# Supplementary material for: Metagenomics-informed soil biogeochemical models projected less carbon loss in tropical soils in response to climate warming
Source: Research Square preprint supplement (doi:10.21203/rs.3.rs-918612/v2), 2021-10-08
Supplement: Supplementary file 2 [file 60d990852ea182a6fde07f03.xlsx]

## Sheet: Sheet1
Supplementary Data S4. Calibrated parameters in the CoMEND model
Parameter symbol	Description	A priori range	Calibrated Value†	Unit	Eq. ID
Vg	Maximum specific uptake rate of DOM for growth at 20 °C	(0.001,0.1)	0.004	mg C mg-1 C h-1	Eqs. S32-S33, S102
α	Vg/(Vg+Vm), Vm is the maximum specific uptake rate of DOM for maintenance at 20°C	(0.01,0.5)	0.15	Unitless	Eqs. S32-S39, S103, S111, S109
Yg0	True growth yield at 20oC	(0.2, 0.6)	0.3	Unitless	Eq. S106
	Half-saturation constant of uptake of DOM for microbial growth	(0.01,0.95)	0.85	mg C cm-3 soil	Eqs. S32-S34, S37-S38, S105
	Fraction of Vm for dormant maintenance respiration	(0.0005,0.05)	0.025	Unitless	Eq. S35
	Initial active fraction of microbial biomass, r0=MBA/(MBA+MBD)	(0.01,1.0)	0.5	Unitless	Eqs. S32-S39
	Fraction of Vm for microbial mortality	(0.0005,1.0)	0.5086	Unitless	Eq. S36
	Soil water potential threshold for microbial mortality	(-0.6, -0.1)	-0.4	MPa	Eq. S107
	Soil water potential threshold for microbial dormancy	(-0.6, -0.1)	-0.3003	MPa	Eq. S109
		(0.01,0.95)	0.0212	Unitless	Eq. S111
	is the soil water potential threshold for microbial resuscitation
	Exponential parameter in Eq. S111	(0.5, 6.0)	0.501	Unitless	Eqs. S109, S111
	Desorption rate of QMOM at 20 oC	(0.0001, 0.003)	0.00026	mg C cm-3 soil h-1	Eq. S11
	The fraction of QROMi desorption rate to	(0.1, 5.5)	[1.1297, 1.0003, 1.0001, 1.0001, 1.4977, 5.0001, 1.3657]a	Unitless	Eq. S8
	where i=1,2, …, 7,
	The fraction of ji desorption rate to	(1.0, 1.2)	[1.0559, 1.0002]a	Unitless	Eqs. S9-S10
	where ji= QLOMi, QOOMi and i=1, 3 for QLOMi, and i=1, 2, 3…, 6 for QOOMi
	The fraction of MROMi desoprtion rate to	(0.1, 0.8)	0.1001a	Unitless	Eq. S13
	where i=1, 2…,7,
	The fraction of MLOMi to desorption rate to	(0.1, 0.8)	0.1057a	Unitless	Eq. S15
	where i= 1, 3,
	The fraction of MOOMi desorption rate to	(0.1, 0.8)	0.1991a	Unitless	Eq. S17
	where i=1, 3,
	The fraction of MMOM desorption rate to QMOM desorption rate,	(0.01, 0.8)	0.0752	Unitless	Eq. S19
	The fraction of binding affinity to QROMi to	(0.6, 2.5)	[1.2361, 1.2788, 1.050, 1.200, 1.0017, 1.2788, 1.0084]a	Unitless	Eq. S4
	where i=1,2, …,7,
	The fraction of binding affinity to the pool ji to	(1.0, 2.0)	[1.0028, 1.0004]a	Unitless	Eqs. S5-S6
	where ji= QLOMi, QOOMi, and i=1, 3 for QLOMi, and i=1, 2…, 6 for QOOMi,
	The fraction of binding affinity to the MROMi to	(2.0, 50.0)	25.999a	Unitless	Eq. S12
	and i=1, 2, …, 7
	The fraction of binding affinity to MLOMi to	(2.0, 50.0)	39.43a	Unitless	Eq. 14
	where i= 1, 3,
	The fraction of binding affinity to MOOMi to	(2.0, 50.0)	47.81a	Unitless	Eq. 16
	where i= 1, 2, …, 6,
	The fraction of binding affinity to MMOM to	(45.0, 150.0)	50	Unitless	Eq. S18
	Rate constant for weathering of parent material P	(1.e-5, 0.003)	0.00277	month-1	Eq. S20
	Rate constant for conversion of secondary P minerals to occluded P	(1.e-7,0.003)	3.7e-07	month-1	Eq. S21
	Rate constant for desorption of secondary P	(0.0001,0.003)	0.001	month-1	Eq. S22
	Rate constant for conversion of labile P to secondary mineral P	(0.0001,0.006)	0.005	month-1	Eq. S23
	The empirical constant representing the tendency of dissolved inorganic P for adsorption	(1.e-5,0.003)	0.00293	mg P cm-3 soil	Eqs. S86-S87
	Maximum sorption capacity of labile P	(0.2,1.7)	0.2538	mg P cm-3 soil	Eqs. S86-S87
	The sensitivity parameter of to C limitation	(0.0,0.1)	0.003d	Unitless	Eq. S113
	The sensitivity parameter of	(0.0,0.05)	0.0003d	Unitless	Eq. S114
	The sensitivity parameter of	(0.0,0.05)	0.0034d	Unitless	Eq. S113
	The sensitivity parameter of	(0.0,0.05)	0.00325d	Unitless	Eq. S114
	The sensitivity parameter of	(0.0,0.05)	0.0006d	Unitless	Eq. S114
	The sensitivity parameter of	(0.0,0.05)	0.0034d	Unitless	Eq. S113
	The sensitivity parameter of	(0.0,0.05)	0.0047d	Unitless	Eq. S114
	The sensitivity parameter of	(0.0,0.05)	0.0005d	Unitless	Eq. S114
	The sensitivity parameter of all P-acquiring EFCs to P limitation	(0.0,0.05)	0.0404d	Unitless	Eq. S115
	The sensitivity parameter of	(0.0,0.05)	0.0005d	Unitless	Eq. S113
	The sensitivity parameter of	(0.0,0.05)	0.0005d	Unitless	Eq. S114
	The sensitivity parameter of all P-acquiring EFCs to water limitation	(0.0,0.05)	0.0005d	Unitless	Eq. S115
†The data in the bracket represent those for the ith enzyme function class (EFCi) or SOM pool described in the description column.
aThe parameter values are only used in the CoMENDH and CoMENDHD.
dThe parameter values are only used in the CoMENDHD.
