# Supplementary material for: Metagenomics-informed soil biogeochemical models projected less carbon loss in tropical soils in response to climate warming
Source: Research Square preprint supplement (doi:10.21203/rs.3.rs-918612/v2), 2021-10-08
Supplement: Supplementary file 2 [file b378096f68eb52afee87dc27.pdf]

1 **Supplementary Information Guide for**  
2 **Metagenomics-informed soil biogeochemical models projected less carbon loss in**  
3 **tropical soils in response to climate warming**  
4  
5

6 Yang Song<sup>a,b</sup>, Qiuming Yao<sup>c,d</sup>, Xiaojuan Yang<sup>b</sup>, S. Joseph Wright<sup>g</sup>, Gangsheng Wang<sup>bj</sup>, Terry C. Hazen<sup>e,f</sup>,  
7 Benjamin L. Turner<sup>g</sup>, Malak M. Tfaily<sup>h,l</sup>, Ljiljana Paša-Tolic<sup>h</sup>, Eric R. Johnston<sup>i</sup>, Minjae Kim<sup>i</sup>, Konstantinos  
8 T. Konstantinidis<sup>i</sup>, Chongle Pan<sup>c,k</sup>, and Melanie A. Mayes<sup>b</sup>

9  
10  
11  
12 \*Yang Song and Melanie A. Mayes

13 **Email:** [chopinsong@arizona.edu](mailto:chopinsong@arizona.edu) and [mayesma@ornl.gov](mailto:mayesma@ornl.gov)  
14

15 **The SI files includes:**  
16

17 1. Song et al\_SI.pdf

18 a. Supplementary Methods

19 **Method S1.** Projection of soil carbon dynamics in response to climate change

20 **Method S2.** SOM analysis with Electrospray Ionization Fourier Transformed Ion  
21 Cyclotron Resonance Mass Spectrometry (ESI-FTICR MS)

22 **Method S3.** A summary of the equations in the CoMEND model

23 **Method S4.** Parameterization of the dynamic EFC allocation scheme for resource  
24 acquisition

25 **Method S5.** Kinetic parameters in the CoMEND model.

26 **Method S6.** Site-specific parameter optimization in the CoMEND model.

27 **Method S7.** Initialization of soil pools in the CoMEND model.

28 **Method S8.** Input data for the CoMEND model.

29 b. Supplementary Equations

30 **S1-S92**

31 c. Supplementary Figures

32 **Fig. S1.** Metagenomics-informed lignocellulose-containing soil organic matter (SOM)  
33 decomposition pathways and corresponding enzymes identified in the Panama soil  
34 samples, where EC refers to the Enzyme Classification number

35 **Fig. S2.** Metagenomics-informed nitrogen (N)-containing SOM decomposition and  
36 mineralization pathways and corresponding enzymes identified in the Panama soil  
37 samples, where EC refers to the Enzyme Classification numbers.

38 **Fig S3.** Metagenomics-informed P-containing SOM decomposition and mineralization  
39 pathways and corresponding enzymes identified in the Panama soil samples, where EC  
40 refers to the Enzyme Classification numbers.

41 **Fig. S4.** Modeled and metagenomics-informed effect sizes of enzyme function groups  
42 (EFCs) between the control and P-fertilized soils. Here the effect size is defined as the  
43  $\log_2$  fold change of gene abundance of the EFC in the control plots relative to that in the  
44 P-fertilized soils. The error bar represents the standard deviation of metagenomics-  
45 informed effect size of each EFC. The filled symbols indicate that the difference of the  
46 EFC between the control soils and the P-fertilized soils is statistically significant (q-value  
47 <0.05). The Willmott index of agreement (WI) for all EFCs is 0.47 (P value <0.05), while  
48 the index (WI<sub>sig</sub>) for EFCs with statistically significant effect size is 0.67 (P value <0.05).  
49 C<sub>EFC</sub>, N<sub>EFC</sub>, P<sub>EFC</sub> are EFCs for decomposing lignocellulose-containing, N-containing, and  
50 P-containing SOM, respectively.

51 **Fig. S5.** Effects of enzyme functional diversity of soil microbial communities on  
52 decomposition kinetics of enzyme functional classes (EFCs): (a-b) Activation energy  
53 (kJ/mol); (c-d) Potential EFC activity (Vd \*E); and (e-f) Substrate affinity (K<sub>m</sub>). Three

54  
55  
56  
57  
58  
59  
60  
61  
62  
63  
64  
65  
66  
67  
68  
69  
70  
71  
72  
73  
74  
75  
76  
77  
78  
79  
80  
81  
82  
83  
84  
85  
86  
87  
88  
89  
90  
91

version of models were compared: CoMEND<sub>H</sub> included all metagenomics-informed 22 EFCs for SOM decomposition and thus represented high enzyme functional diversity. CoMEND<sub>M</sub> only included 15 EFCs for SOM decomposition and thus represented moderate functional diversity of microbial community. CoMEND<sub>L</sub> included 11 clusters of EFCs and represented low functional diversity of microbial community.

- d. Supplementary Tables S1-S3  
**Table S1.** Classification of soil enzyme functional groups (EFCs) in Panamanian soils.  
**Table S2.** Classification of soil enzyme functional groups (EFCs) in Panamanian soils.  
**Table S3.** Chemical components, representative molecular formula and C/N and C/P ratio of SOM pool.
- e. Supplementary Notes  
References cited in the SI

## 2. Supplementary Data S1 to S7

- a. **Supplementary Data S1.xlsx**: **Supplementary Data S1.** Differential analysis of gene abundances of all detected enzymes in the Panama soil samples.
- b. **Supplementary Data S2.xlsx**: **Supplementary Data S2.** EC numbers in soil enzyme function classes (EFCs) for organic matter decomposition and mineralization in the Gigante soil and differential analysis of gene abundances for each enzyme between P-deficient Control and P-fertilized soils.
- c. **Supplementary Data S3.xlsx**: **Supplementary Data S3.** Microbial-activated (A), mineral-protected (M), and adsorbed (Q) soil organic matter (SOM) pools, inorganic N and P pools, and the corresponding soil enzyme functional groups (EFCs) that act on each pool in the CoMEND model.
- d. **Supplementary Data S4.xlsx**: **Supplementary Data S4.** Kinetic parameters in the CoMEND model.
- e. **Supplementary Data S5.xlsx**: **Supplementary Data S5.** Calibrated parameters in the CoMEND model.
- f. **Supplementary Data S6.xlsx**: **Supplementary Data S6.** Non-calibrated parameters in the CoMEND model.
- g. **Supplementary Data S7.xlsx**: **Supplementary Data S7.** Initial soil physical and chemical properties
