# Supplementary material for: Metagenomics-informed soil biogeochemical models projected less carbon loss in tropical soils in response to climate warming
Source: Research Square preprint supplement (doi:10.21203/rs.3.rs-918612/v2), 2021-10-08
Supplement: Supplementary file 6 [file d582d6c57a258461e06f854f.xlsx]

## Sheet: Sheet1
Supplementary Data S6. Non-calibrated parameters in the CoMEND model
Parameter symbol	Description	Value†	Unit	Source	Eq. ID
	Minimum C/N ratio of microbial biomass	5.3	Unitless	17,28, 29	Eq. S112
	Maximum C/N ratio of microbial biomass	15.3	Unitless	17,28, 29	Eq. S112
	Averaged C/N ratio of microbial biomass	7.3	Unitless	17,28, 29	Eq. S112
	Minimum C/P ratio of microbial biomass	9	Unitless	17,28, 29	Eq. S112
	Maximum C/P ratio of microbial biomass	70	Unitless	17,28, 29	Eq. S112
	Averaged C/P ratio of microbial biomass	16.5	Unitless	17,28, 29	Eq. S112
	C/N ratio of woody litter	203	Unitless	30	Eq. S42
	C/N ratio of root litter	35	Unitless	22	Eq. S42
	C/N ratio of leaves litter	35	Unitless	22	Eq. S42
	C/N ratio of product litter	35	Unitless	22	Eq. S42
	C/P ratio of woody litter	7276	Unitless	30	Eq. S43
	C/P ratio of root litter	7276	Unitless	22	Eq. S39
	C/P ratio of leaves litter	706	Unitless	22	Eq. S43
	C/P ratio of product litter	150	Unitless	22	Eq. S43
	The minimum soil water potential	-13.9	MPa	10	Eq. S95
	Soil water potential at field capacity	-0.033	MPa	31	Eq. S95
b	Exponential parameter in Eq.S107	1	Unitless	31	Eq. S107
	Maximum sorption capacity of QMOM	3.6	mg C cm-3 soil	This study	Eq. S7
	Maximum sorption capacity of MOOM	26.64	mg C cm-3 soil	This studyd	Eq. S11
	The fraction of maximum sorption capacity of QROMi to	[0.646, 0.258, 0.0333, 0.156, 0.0014, 0.0044, 0.0003]*a	Unitless	This study	Eqs. S4, S8
	where i=1,2, …,7 for CoMENDHD, CoMENDH, and CoMENDM, i=1, 2, 3 for CoMENDL	[0.863, 0.258, 0.156, 0.311, 0.0015, 0.0033, 0.0003]*b
		[3.277, 0.4807, 0.0125]*c
	The fraction of maximum sorption capacity of the pool ji to	[2.59, 1.09]* a	Unitless	This study	Eqs. S5-S6,
	where ji= QLOMi, QOOMi, and i=1, 3 for QLOMi and i=1, 2, …, 6 for QOOMi				S9-S10
	The fraction of maximum sorption capacity of MROMi to	6.95	Unitless	This study	Eqs. S12-S13
	and i= i=1, 2, …, 7
	The fraction of maximum sorption capacity of MLOMi to	6.18a	Unitless	This study	Eqs. S14-S15
	where i=1, 3,
	The fraction of maximum sorption capacity of MOOMi to	6.95a	Unitless	This study	Eqs. S16-S17
	where i=1, 2, …, 6,
	Binding affinity of QMOM,	2.6	(mg C cm-3 soil h-1)-1	This study	Eq. S18
	The fraction of QROMi desorption rate to	[1.1688, 1.0349, 1.0347, 1.0347, 1.5496, 5.1732, 1.4130]*b;	Unitless	This study	Eq. S8
	where i=1,2, …, 7 for CoMENDM, and i=1, 3 for CoMENDL	[1.0887, 1.0224, 2.6795]*c
	The fraction of MROMi to	0.1344b-c	Unitless	This study	Eq. S13
	where i=1, 2…,7 for CoMENDM, and i=1, 2, 3 for CoMENDL
	The fraction of binding affinity to QROMi to	[0.8937, 0.9246, 0.7592, 0.8676, 0.7242, 0.9246, 0.7291]b	Unitless	This study	Eq. S4
	where i=1,2, …,7 for CoMENDM, and i=1, 2, 3 for CoMENDL	[0.9082, 0.8134, 0. 7890]c
	The fraction of binding affinity to the MROMi to	40.21b-c	Unitless	This study	Eq. S12
	and i=1, 2, …, 7 for CoMENDM, and i=1, 2, 3 for CoMENDL
	Fraction of dead microbial biomass into ADOM pool	0.32	Unitless	This study	Eqs. S41-S43, S50-S52
	N-containing cell wall component, nucleic acids and phospholipids fraction in undissolved dead microbial biomass	[0.21, 0.44, 0.35]	Unitless	14	Eqs. S41-S43
