# Supplementary material for: Metagenomics-informed soil biogeochemical models projected less carbon loss in tropical soils in response to climate warming
Source: Research Square preprint supplement (doi:10.21203/rs.3.rs-918612/v2), 2021-10-08
Supplement: Supplementary file 8 [file a29cf4207d0414466534e7af.xls]

## Sheet: Sheet1
Supplementary Data S1. Differential analysis of gene abundances of all detected enzymes in the Panama soil samples.
E.C.	Gene Abundances				Comparison of P-deficient Control vs. P-fertilized			Description
	P-fertilized soils		P-deficient Control soils
	Plot 1	Plot 30	Plot 6	Plot 36	log2 fold change	p-value	q-value
1.17.5.2	3.53977e+06	3.3905e+06	2.79164e+06	2.48819e+06	-0.448713	1.63448e-18	2.7751e-15	caffeine dehydrogenase
3.7.1.19	518690	509929	408579	381666	-0.435514	5.36565e-11	4.55504e-08	2,6-dihydroxypseudooxynicotine hydrolase
1.14.11.17	1.25846e+06	1.22278e+06	1.09654e+06	950194	-0.334953	3.80189e-09	2.15168e-06	taurine dioxygenase
1.14.13.167	545078	531091	454556	381803	-0.421836	2.03946e-08	8.65673e-06	4-nitrophenol 4-monooxygenase
2.5.1.41	2653.64	3245.05	9652.29	7689.44	1.49404	8.76692e-08	2.97698e-05	phosphoglycerol geranylgeranyltransferase
4.1.1.8	293821	291338	234365	213765	-0.440843	6.8096e-07	0.000192695	oxalyl-CoA decarboxylase
1.1.1.346	310674	282889	239361	200098	-0.491346	1.15134e-06	0.000279257	2,5-didehydrogluconate reductase (2-dehydro-L-gulonate-forming)
2.8.3.6	972698	916187	861189	760666	-0.276292	1.3669e-06	0.000290099	3-oxoadipate CoA-transferase
4.1.3.32	627054	629991	560657	509558	-0.288283	1.65818e-06	0.000312816	2,3-dimethylmalate lyase
4.1.1.55	1.55747e+06	1.71655e+06	1.38818e+06	1.31289e+06	-0.333348	2.26845e-06	0.000379388	4,5-dihydroxyphthalate decarboxylase
5.2.1.4	169631	171826	127624	114247	-0.554116	2.45797e-06	0.000379388	maleylpyruvate isomerase
3.1.3.8	8131.99	12103.7	27901.6	65075.1	2.16579	2.71507e-06	0.000384149	3-phytase
1.8.1.2	383608	353671	311427	264083	-0.414746	3.32345e-06	0.000434055	assimilatory sulfite reductase (NADPH)
3.2.1.28	1.67781e+06	1.49308e+06	1.41875e+06	1.18543e+06	-0.341552	4.36649e-06	0.000529546	alpha,alpha-trehalase
1.2.99.2	5.721e+06	5.69133e+06	5.14155e+06	4.94656e+06	-0.232376	4.86378e-06	0.000550532	carbon-monoxide dehydrogenase (acceptor)
1.2.99.3	691917	672279	622969	515766	-0.31913	8.39479e-06	0.000890818	aldehyde dehydrogenase (pyrroloquinoline-quinone)
1.14.13.24	535849	485581	450019	393917	-0.331708	1.00904e-05	0.000951772	3-hydroxybenzoate 6-monooxygenase
1.13.11.2	1.09674e+06	995259	944227	867252	-0.262678	9.89869e-06	0.000951772	catechol 2,3-dioxygenase
1.97.1.2	186744	177412	143015	110753	-0.581251	1.389e-05	0.00124122	pyrogallol hydroxytransferase
1.3.99.16	2.43425e+06	2.50597e+06	2.30176e+06	2.05971e+06	-0.236564	1.54711e-05	0.00131338	isoquinoline 1-oxidoreductase
1.17.2.1	1.85056e+06	1.73805e+06	1.68103e+06	1.50448e+06	-0.227902	1.84904e-05	0.00149495	nicotinate dehydrogenase (cytochrome)
2.6.1.66	873.264	973.693	2294.88	3132.92	1.50952	3.08903e-05	0.00209898	valine---pyruvate transaminase
3.8.1.2	978319	1.00601e+06	924784	788618	-0.269951	3.08706e-05	0.00209898	(S)-2-haloacid dehalogenase
1.14.13.114	949600	885247	852823	767449	-0.235205	3.23634e-05	0.00210592	6-hydroxynicotinate 3-monooxygenase
1.14.14.8	388270	394622	342871	309230	-0.320185	3.34894e-05	0.00210592	anthranilate 3-monooxygenase (FAD)
3.5.1.107	402312	415304	340517	334552	-0.33055	3.92939e-05	0.00238268	maleamate amidohydrolase
5.1.3.-	293689	272334	376433	376023	0.357989	4.20003e-05	0.00244885	Acting on carbohydrates and derivatives
3.5.4.1	353616	357422	310374	275828	-0.335368	4.32698e-05	0.00244885	cytosine deaminase
1.14.99.46	516858	441964	413170	326873	-0.432346	4.99986e-05	0.00265281	pyrimidine oxygenase
4.2.1.84	881227	828013	798779	665560	-0.281145	4.98913e-05	0.00265281	nitrile hydratase
5.1.99.5	380782	377679	337935	292492	-0.324173	6.28566e-05	0.00323397	hydantoin racemase
6.2.1.33	148122	122291	101070	76245.6	-0.66857	7.62906e-05	0.00380971	4-chlorobenzoate---CoA ligase
4.2.1.25	699648	666990	642071	569477	-0.230168	8.19844e-05	0.00386659	L-arabinonate dehydratase
5.2.1.1	368757	368768	327117	289897	-0.314215	8.17829e-05	0.00386659	maleate isomerase
1.7.7.1	438510	439016	400607	344862	-0.292956	0.000105025	0.00478448	ferredoxin---nitrite reductase
4.1.1.-	1.95162e+06	2.09265e+06	1.86852e+06	1.68479e+06	-0.243658	0.000107083	0.00478448	Carboxy-lyases
2.2.1.11	146.575	221.525	714.297	545.879	1.70685	0.000116519	0.00507262	6-deoxy-5-ketofructose 1-phosphate synthase
1.14.14.7	60522.1	62732	98317.5	94013.4	0.586986	0.000132475	0.005522	tryptophan 7-halogenase
3.1.2.23	263251	254240	222866	195021	-0.365305	0.000133346	0.005522	4-hydroxybenzoyl-CoA thioesterase
4.2.2.23	19329.7	20469.3	35071	67495.1	1.32979	0.000160694	0.00620078	rhamnogalacturonan endolyase
4.1.1.7	1.04892e+06	1.09452e+06	974191	931338	-0.224771	0.000158806	0.00620078	benzoylformate decarboxylase
1.1.99.-	966267	921062	900386	761391	-0.241364	0.00016711	0.00630505	With other acceptors
3.4.24.28	22974.6	28556.8	44496	60457.1	0.97959	0.000174063	0.00642462	bacillolysin
1.2.7.8	318236	311640	268769	255954	-0.318105	0.000179826	0.00645052	indolepyruvate ferredoxin oxidoreductase
2.1.1.178	3154.8	3425.74	8171.69	5964.24	1.03996	0.000182363	0.00645052	16S rRNA (cytosine1407-C5)-methyltransferase
4.1.99.3	95717.8	88288.8	141842	127863	0.495981	0.00019648	0.00667188	deoxyribodipyrimidine photo-lyase
1.13.11.4	631790	683864	579247	555393	-0.268814	0.00019375	0.00667188	gentisate 1,2-dioxygenase
3.4.99.-	3516.93	2637.94	1495.49	1265.56	-1.21211	0.000201244	0.00669966	Endopeptidases of unknown catalytic mechanism
2.1.1.17	848304	772956	762207	671020	-0.234056	0.000221228	0.00708701	phosphatidylethanolamine N-methyltransferase
3.2.1.55	313211	287750	392147	378993	0.306102	0.000220956	0.00708701	non-reducing end alpha-L-arabinofuranosidase
1.14.14.12	752987	726065	702446	634235	-0.201997	0.000233876	0.00735347	3-hydroxy-9,10-secoandrosta-1,3,5(10)-triene-9,17-dione monooxygenase
1.14.12.15	264139	260146	230063	197069	-0.35333	0.000272088	0.00824937	terephthalate 1,2-dioxygenase
6.6.1.2	554130	488125	471521	362989	-0.380427	0.000354239	0.0105516	cobaltochelatase
3.4.24.40	43677.9	60372.9	87419	102778	0.818639	0.00038709	0.0111393	serralysin
5.3.1.17	12274.5	14384.8	23541.2	25428	0.824681	0.000430823	0.011798	5-dehydro-4-deoxy-D-glucuronate isomerase
1.14.12.-	488718	517269	457766	417723	-0.256936	0.000428571	0.011798	With NADH or NADPH as one donor, and incorporation of two atoms of oxygen into one donor
1.1.1.31	346451	340817	308348	278405	-0.284272	0.000417397	0.011798	3-hydroxyisobutyrate dehydrogenase
1.1.1.90	139948	121409	104737	84847.7	-0.521321	0.000457701	0.0119292	aryl-alcohol dehydrogenase
3.1.6.-	487212	504761	621971	718378	0.384647	0.000463722	0.0119292	Sulfuric ester hydrolases
6.3.1.11	33507.6	41222.1	60694.3	70522.1	0.761277	0.000453687	0.0119292	glutamate---putrescine ligase
1.4.1.21	232692	232493	200635	180514	-0.343837	0.000511159	0.0129533	aspartate dehydrogenase
3.1.4.12	526.18	785.041	1436.34	2833.25	1.66476	0.000622235	0.015311	sphingomyelin phosphodiesterase
6.2.1.25	768750	784817	725720	683988	-0.195439	0.000617753	0.015311	benzoate---CoA ligase
3.4.21.50	6283.96	9783.98	15731.4	19597.8	1.08573	0.0006497	0.0157585	lysyl endopeptidase
2.7.10.2	448962	497124	602908	593705	0.28421	0.000691831	0.016544	non-specific protein-tyrosine kinase
3.1.4.14	10354.6	9913.24	21113.7	15794.6	0.803522	0.000787601	0.0185726	[acyl-carrier-protein] phosphodiesterase
1.1.99.3	1.18801e+06	1.08517e+06	1.06767e+06	795400	-0.347989	0.000823861	0.0191615	gluconate 2-dehydrogenase (acceptor)
1.13.11.37	343516	310329	295167	254930	-0.305941	0.000908672	0.0193153	hydroxyquinol 1,2-dioxygenase
1.13.11.33	10875.3	11095.8	18069.5	22246.5	0.828081	0.000910107	0.0193153	arachidonate 15-lipoxygenase
1.14.14.9	279832	281365	254001	213651	-0.32143	0.000908347	0.0193153	4-hydroxyphenylacetate 3-monooxygenase
1.8.4.-	1.11893e+06	1.11231e+06	1.08986e+06	933197	-0.199064	0.000885211	0.0193153	With a disulfide as acceptor
3.1.1.92	883388	920656	858554	777102	-0.197948	0.000853084	0.0193153	4-sulfomuconolactone hydrolase
3.5.4.23	77622.9	62581	52409.1	40250.5	-0.656543	0.000965007	0.0199809	blasticidin-S deaminase
1.1.2.3	917970	908609	857268	818448	-0.178981	0.000953293	0.0199809	L-lactate dehydrogenase (cytochrome)
3.5.1.46	323930	318944	414638	378572	0.247324	0.000999887	0.0204537	6-aminohexanoate-oligomer exohydrolase
1.6.5.5	4.6026e+06	4.38897e+06	4.4107e+06	3.65345e+06	-0.215387	0.00106716	0.0215699	NADPH:quinone reductase
1.18.1.3	651542	572528	574335	490331	-0.258053	0.00116677	0.0232922	ferredoxin---NAD+ reductase
3.2.1.89	1907.47	2092.76	3822.9	4373.69	0.984674	0.00117981	0.0232922	arabinogalactan endo-beta-1,4-galactanase
1.13.11.24	487628	516363	615425	638457	0.267825	0.00119476	0.0233163	quercetin 2,3-dioxygenase
1.16.1.1	410030	444345	389178	349668	-0.266727	0.00124163	0.0237248	mercury(II) reductase
3.4.13.-	1.03e+06	925657	933687	828034	-0.206546	0.00124364	0.0237248	Dipeptidases
1.1.5.4	97274.3	104244	82015	61599.6	-0.550813	0.00137447	0.0255619	malate dehydrogenase (quinone)
1.1.1.26	1.76498e+06	1.78e+06	1.67502e+06	1.60055e+06	-0.168784	0.00136644	0.0255619	glyoxylate reductase
1.3.1.53	65547.5	62033.6	44638.7	45157.2	-0.559266	0.0013851	0.0255619	(3S,4R)-3,4-dihydroxycyclohexa-1,5-diene-1,4-dicarboxylate dehydrogenase
1.13.11.39	932292	935789	905014	819140	-0.171926	0.00141765	0.0257107	biphenyl-2,3-diol 1,2-dioxygenase
2.3.1.37	321550	291829	280041	222167	-0.347622	0.00142345	0.0257107	5-aminolevulinate synthase
6.2.1.27	184416	176319	155199	138483	-0.352926	0.00146508	0.026184	4-hydroxybenzoate---CoA ligase
3.1.1.2	615116	617540	587270	536822	-0.188988	0.00148624	0.0262855	arylesterase
4.1.1.75	304250	286360	268594	235923	-0.283856	0.0015581	0.0272673	5-guanidino-2-oxopentanoate decarboxylase
3.1.1.32	5766.23	5378.58	8971.23	16265.5	1.14273	0.00157387	0.0272673	phospholipase A1
1.6.5.-	473755	488476	590043	568181	0.212735	0.00164796	0.0279798	With a quinone or similar compound as acceptor
2.3.1.178	144098	133047	117908	95062.1	-0.43881	0.00163939	0.0279798	diaminobutyrate acetyltransferase
4.2.1.12	20192	21156.6	33352.2	33409.7	0.637434	0.00174567	0.0290756	phosphogluconate dehydratase
5.4.1.2	147814	121112	109059	70634.1	-0.645581	0.00174675	0.0290756	precorrin-8X methylmutase
2.4.99.14	1262.15	1506.57	3646.34	2446.37	1.07136	0.00178124	0.0293619	(Kdo)2-lipid IVA (2-8) 3-deoxy-D-manno-octulosonic acid transferase
2.1.1.176	322598	286014	276901	230989	-0.31851	0.00183745	0.0299973	16S rRNA (cytosine967-C5)-methyltransferase
3.4.24.55	1036.38	1002.33	3163.57	1722.02	1.19145	0.002007	0.032147	pitrilysin
3.1.1.4	5658.35	5280.65	8651.96	16003.1	1.13649	0.00199618	0.032147	phospholipase A2
3.6.3.42	188444	167736	155232	128362	-0.386565	0.00204958	0.0325222	beta-glucan-transporting ATPase
2.5.1.84	17055.8	18093.5	28058.5	29341.5	0.654902	0.00215615	0.0325792	all-trans-nonaprenyl-diphosphate synthase [geranyl-diphosphate specific]
4.2.2.2	42025.1	33253.2	55194	87862.7	0.887903	0.00215973	0.0325792	pectate lyase
1.1.1.47	995960	992464	980851	830250	-0.192861	0.00230262	0.0325792	glucose 1-dehydrogenase [NAD(P)+]
1.2.1.77	68484.9	75071	52644.2	51023.8	-0.524712	0.00227638	0.0325792	3,4-dehydroadipyl-CoA semialdehyde dehydrogenase (NADP+)
3.4.13.22	257287	265557	238712	200667	-0.309517	0.00228972	0.0325792	D-Ala-D-Ala dipeptidase
4.99.1.2	49978.2	54741.3	40579.6	28683.1	-0.660361	0.00207355	0.0325792	alkylmercury lyase
2.5.1.44	233869	198955	189760	153829	-0.391054	0.00221306	0.0325792	homospermidine synthase
6.3.1.5	52241.3	50653.2	72141.8	93105.3	0.637569	0.00227407	0.0325792	NAD+ synthase
3.1.13.-	18251.1	19020.1	30585.3	29264	0.628271	0.00220814	0.0325792	Exoribonucleases producing 5'-phosphomonoesters
2.7.1.76	12192.2	17115.9	25487.2	27873.4	0.810715	0.00218636	0.0325792	2'-deoxyadenosine kinase
2.7.1.74	12139.4	17055.9	25361.6	27718.2	0.808672	0.00226479	0.0325792	deoxycytidine kinase
3.4.21.4	59217.4	65330.1	91249.2	91651	0.500256	0.00225456	0.0325792	trypsin
2.1.1.157	247752	259119	230890	190518	-0.325646	0.00241356	0.0336816	sarcosine/dimethylglycine N-methyltransferase
1.1.1.87	176001	172440	139870	142315	-0.356984	0.00250185	0.0342562	homoisocitrate dehydrogenase
4.1.1.96	12976.9	14006.8	21940.8	22740.7	0.67456	0.00249618	0.0342562	carboxynorspermidine decarboxylase
2.5.1.18	2.3821e+06	2.46052e+06	2.35053e+06	2.1476e+06	-0.162701	0.00255114	0.0346516	glutathione transferase
1.1.1.337	140432	144683	110322	113713	-0.400598	0.00265205	0.0357363	L-2-hydroxycarboxylate dehydrogenase (NAD+)
2.3.1.204	3675.06	5167.08	7686.63	10160.3	0.964789	0.00275953	0.0368918	octanoyl-[GcvH]:protein N-octanoyltransferase
4.2.3.90	2054.02	2730.05	5315.05	4194.43	0.928509	0.00284093	0.0376833	5-epi-alpha-selinene synthase
5.5.1.19	291.046	353.287	1046.58	601.814	1.28585	0.00294554	0.038768	lycopene beta-cyclase
1.13.11.8	385500	344987	337891	297766	-0.256633	0.00313582	0.040955	protocatechuate 4,5-dioxygenase
3.4.15.5	247213	221155	211365	178699	-0.321131	0.00329934	0.0427617	peptidyl-dipeptidase Dcp
2.7.8.37	403447	419345	381058	353090	-0.220348	0.00350832	0.0447864	alpha-D-ribose 1-methylphosphonate 5-triphosphate synthase
4.1.3.40	799.099	897.221	1928.52	1584.9	0.990954	0.00349674	0.0447864	chorismate lyase
3.1.1.24	946253	924727	908339	842362	-0.151194	0.00366266	0.0464078	3-oxoadipate enol-lactonase
3.4.24.27	4580.84	7260.85	10732	12911.1	0.945433	0.00371981	0.0467828	thermolysin
3.1.6.6	441031	448130	532514	604020	0.30419	0.003766	0.0470155	choline-sulfatase
4.1.1.61	278.013	438.581	733.633	1169.1	1.3636	0.00398662	0.0492915	4-hydroxybenzoate decarboxylase
2.7.7.65	720839	787616	934131	868410	0.200729	0.00400638	0.0492915	diguanylate cyclase
2.9.1.-	14077.4	15448.3	22411.8	26964.1	0.692926	0.00406683	0.0494841	Selenotransferases
4.3.1.7	333770	333539	316488	256550	-0.279078	0.00408032	0.0494841	ethanolamine ammonia-lyase
2.3.1.31	840042	868911	837176	739042	-0.173876	0.00415854	0.0500751	homoserine O-acetyltransferase
3.4.14.11	21335.6	22431.4	31363.1	44766.8	0.75481	0.00420213	0.0502436	Xaa-Pro dipeptidyl-peptidase
4.2.2.5	1305.91	1047.79	2643.98	2084.81	0.94812	0.00438296	0.0513215	chondroitin AC lyase
1.3.1.84	595790	540974	551188	441599	-0.254231	0.00435833	0.0513215	acrylyl-CoA reductase (NADPH)
1.14.13.81	1672.39	2001.28	4300.09	3001.62	0.926233	0.004381	0.0513215	magnesium-protoporphyrin IX monomethyl ester (oxidative) cyclase
2.-.-.-	6.25972e+06	5.99118e+06	6.13167e+06	5.32657e+06	-0.153519	0.00451913	0.0521959	Transferases
2.1.1.66	903.175	1317.34	2155.96	2662.99	1.06746	0.00451649	0.0521959	rRNA (adenosine-2'-O-)-methyltransferase
1.1.5.2	423546	440916	520412	645933	0.384519	0.00499687	0.0550905	glucose 1-dehydrogenase (PQQ, quinone)
4.1.1.44	700254	711308	664516	641544	-0.166593	0.00497168	0.0550905	4-carboxymuconolactone decarboxylase
3.6.3.28	390381	419462	368558	348359	-0.231449	0.0049422	0.0550905	phosphonate-transporting ATPase
3.4.21.111	42519.6	53655.3	67732.4	98533.5	0.744901	0.00486849	0.0550905	aqualysin 1
2.1.1.131	119674	87997	83535.3	54807.5	-0.648685	0.00487089	0.0550905	precorrin-3B C17-methyltransferase
1.14.13.83	71842.9	55616	50085.7	30390.6	-0.728579	0.00491191	0.0550905	precorrin-3B synthase
4.2.1.2	1.33764e+06	1.39982e+06	1.31797e+06	1.22591e+06	-0.161653	0.0049074	0.0550905	fumarate hydratase
6.2.1.9	26943.4	26442.3	44762.4	36633.6	0.549598	0.00513048	0.0561986	malate---CoA ligase
3.5.1.84	159222	135017	127938	103369	-0.405203	0.00518724	0.0563763	biuret amidohydrolase
1.1.1.36	501545	465756	467573	405293	-0.205019	0.00521311	0.0563763	acetoacetyl-CoA reductase
3.6.3.19	522346	530577	499067	465494	-0.181959	0.00527438	0.0566779	maltose-transporting ATPase
2.8.2.22	242.274	383.493	595.623	1163.76	1.45422	0.00531095	0.0567119	aryl-sulfate sulfotransferase
3.5.3.11	246053	262325	317856	318267	0.269504	0.00551676	0.0580288	agmatinase
2.7.7.43	55731.3	57616.1	77336.9	89748.4	0.510396	0.00553681	0.0580288	N-acylneuraminate cytidylyltransferase
2.4.99.16	344071	335173	323048	276259	-0.238248	0.00549534	0.0580288	starch synthase (maltosyl-transferring)
3.5.4.-	2.69062e+06	2.73157e+06	2.67451e+06	2.43313e+06	-0.142428	0.00560688	0.0584027	In cyclic amidines
2.1.1.201	1.80605e+06	1.75329e+06	1.78262e+06	1.55376e+06	-0.150367	0.0058224	0.0602778	2-methoxy-6-polyprenyl-1,4-benzoquinol methylase
4.2.2.3	11647.1	16807.5	23274.8	26786.1	0.76247	0.00602612	0.0613533	poly(beta-D-mannuronate) lyase
1.1.1.313	203175	189618	179844	146166	-0.327539	0.00596342	0.0613533	sulfoacetaldehyde reductase
1.1.1.76	48427	54027	37880.8	36588.1	-0.515584	0.0060347	0.0613533	(S,S)-butanediol dehydrogenase
4.2.1.47	729131	756438	723536	656108	-0.16321	0.00626089	0.0625297	GDP-mannose 4,6-dehydratase
3.5.4.2	457825	434587	422003	391708	-0.188248	0.00625378	0.0625297	adenine deaminase
2.1.1.133	165233	133705	127721	77926.8	-0.605099	0.00618924	0.0625297	precorrin-4 C11-methyltransferase
2.7.4.23	159158	149720	137079	117946	-0.333534	0.00641277	0.063384	ribose 1,5-bisphosphate phosphokinase
1.3.7.7	5594.01	7004.95	13792.1	9113.87	0.795405	0.00642109	0.063384	ferredoxin:protochlorophyllide reductase (ATP-dependent)
1.1.1.49	1.4583e+06	1.40481e+06	1.43745e+06	1.20076e+06	-0.176207	0.00650771	0.0637405	glucose-6-phosphate dehydrogenase (NADP+)
3.2.1.41	15879.3	20117.3	27597.5	31634.1	0.666994	0.00656648	0.0637405	pullulanase
3.8.1.3	962656	1.00758e+06	975518	832136	-0.182557	0.00660738	0.0637405	haloacetate dehalogenase
5.3.1.-	654623	654299	767826	753556	0.163091	0.00657509	0.0637405	Interconverting aldoses and ketoses
1.1.1.37	1.15842e+06	1.16693e+06	1.12396e+06	1.06316e+06	-0.143452	0.00673381	0.0638234	malate dehydrogenase
1.3.1.54	126802	96204.4	93023.7	63245.9	-0.574949	0.00668939	0.0638234	precorrin-6A reductase
2.6.1.88	76238.6	83253	106230	119655	0.451346	0.00676633	0.0638234	methionine transaminase
3.2.1.172	48191.4	48256.8	69755.8	67808.4	0.458077	0.00671328	0.0638234	unsaturated rhamnogalacturonyl hydrolase
3.4.22.8	1671.88	3046.56	4331.25	6212.85	1.11155	0.00682227	0.0639955	clostripain
3.1.2.29	392111	390348	373322	335161	-0.1997	0.00730779	0.0678007	fluoroacetyl-CoA thioesterase
4.1.2.43	25435.8	30357.5	38496.9	60149.3	0.779705	0.00739264	0.0682151	3-hexulose-6-phosphate synthase
1.14.13.162	325717	347478	303482	289669	-0.237896	0.00744292	0.0683079	2,5-diketocamphane 1,2-monooxygenase
1.14.13.82	169992	161860	141895	136822	-0.305734	0.00764466	0.0697822	vanillate monooxygenase
1.3.99.22	525959	507014	608054	605567	0.179335	0.0076904	0.0698243	coproporphyrinogen dehydrogenase
4.1.1.79	668457	750145	664682	612579	-0.208126	0.00773166	0.0698255	sulfopyruvate decarboxylase
2.1.1.130	160239	125528	123055	79056.3	-0.563435	0.00792295	0.0711745	precorrin-2 C20-methyltransferase
2.3.1.168	239988	210849	204861	178189	-0.291309	0.00808313	0.0715419	dihydrolipoyllysine-residue (2-methylpropanoyl)transferase
1.1.1.311	305761	319634	277756	271935	-0.240518	0.00809026	0.0715419	(S)-1-phenylethanol dehydrogenase
2.2.1.2	1.19255e+06	1.23159e+06	1.20669e+06	1.0526e+06	-0.159157	0.00806886	0.0715419	transaldolase
2.4.1.64	141351	126249	119451	83461.1	-0.461778	0.00816607	0.0718382	alpha,alpha-trehalose phosphorylase
3.1.31.1	42841.7	43293.6	57528.6	76017.4	0.58705	0.00841446	0.0736417	micrococcal nuclease
3.5.1.42	364905	339171	327401	304111	-0.211773	0.00849576	0.0739719	nicotinamide-nucleotide amidase
1.2.5.1	223055	209439	192222	107316	-0.599041	0.00858616	0.0743776	pyruvate dehydrogenase (quinone)
1.6.99.3	534986	522706	523521	415582	-0.231316	0.00872714	0.0749763	NADH dehydrogenase
5.4.99.17	524646	509085	510630	397876	-0.24651	0.00878776	0.0749763	squalene---hopene cyclase
4.2.1.129	524646	509085	510630	397876	-0.24651	0.00878776	0.0749763	squalene---hopanol cyclase
4.1.1.81	150140	133610	125608	76701.6	-0.55428	0.00893197	0.0755747	threonine-phosphate decarboxylase
5.5.1.2	346074	316346	315990	266799	-0.242197	0.00894691	0.0755747	3-carboxy-cis,cis-muconate cycloisomerase
3.4.24.77	1114.92	1282.28	2024.21	2682.35	0.926518	0.00906346	0.0761802	snapalysin
4.2.1.104	227047	224476	212938	161032	-0.333098	0.00931794	0.0779333	cyanase
6.3.2.37	856.769	1030.66	2028.76	1625.66	0.891713	0.00943043	0.0784876	UDP-N-acetylmuramoyl-L-alanyl-D-glutamate---D-lysine ligase
2.1.1.242	3098.48	3536.37	7099.35	4762.91	0.772609	0.0097544	0.0805102	16S rRNA (guanine1516-N2)-methyltransferase
3.2.1.64	514.99	502.184	1091.7	921.452	0.92689	0.0097683	0.0805102	2,6-beta-fructan 6-levanbiohydrolase
2.1.1.219	2239.58	3063.21	5553.6	4199.56	0.815186	0.0100191	0.0813923	tRNA (adenine57-N1/adenine58-N1)-methyltransferase
3.4.15.6	138164	126246	173544	165144	0.303165	0.00998519	0.0813923	cyanophycinase
3.1.27.-	156340	129991	127303	85576.3	-0.490658	0.00992979	0.0813923	Endoribonucleases producing other than 5'-phosphomonoesters
1.6.99.1	533672	487289	498247	433103	-0.18912	0.0102522	0.0821403	NADPH dehydrogenase
3.8.1.5	2.11982e+06	2.2715e+06	2173469	1.60877e+06	-0.277939	0.0103374	0.0821403	haloalkane dehalogenase
2.1.1.250	142477	125714	178509	166326	0.308332	0.0103266	0.0821403	trimethylamine---corrinoid protein Co-methyltransferase
3.1.6.1	3.70114e+06	3.53829e+06	4.15256e+06	4.34465e+06	0.179413	0.0103531	0.0821403	arylsulfatase
1.1.1.17	2973.2	5194.17	6656.01	10725	1.04481	0.0102108	0.0821403	mannitol-1-phosphate 5-dehydrogenase
3.6.3.43	330061	288749	292798	205760	-0.373952	0.0104254	0.0823288	peptide-transporting ATPase
3.2.1.183	32564.8	40476.3	50546	65909.2	0.625239	0.0105399	0.0828479	UDP-N-acetylglucosamine 2-epimerase (hydrolysing)
1.1.5.8	280170	240232	314504	385980	0.382489	0.0106387	0.0828573	quinate dehydrogenase (quinone)
4.4.1.22	395838	429481	396953	335355	-0.231396	0.0106008	0.0828573	S-(hydroxymethyl)glutathione synthase
1.1.1.291	605818	562263	566103	519319	-0.161079	0.0107903	0.0836542	2-hydroxymethylglutarate dehydrogenase
2.7.1.83	2228.1	2396.38	4665.24	3506.41	0.759253	0.01084	0.0836574	pseudouridine kinase
2.7.11.1	8.68139e+06	8.391e+06	1.01543e+07	9.16807e+06	0.122602	0.0109352	0.0837485	non-specific serine/threonine protein kinase
3.1.25.-	9730.01	9819.5	14147.7	17622.7	0.653364	0.0109504	0.0837485	Site-specific endodeoxyribonucleases specific for altered bases
1.1.1.108	351678	341988	334375	232640	-0.354266	0.0111784	0.0847288	carnitine 3-dehydrogenase
4.1.1.2	221715	204256	197257	126157	-0.46264	0.0111737	0.0847288	oxalate decarboxylase
1.2.1.72	193.53	283.448	462.156	631.704	1.14931	0.0115621	0.0868619	erythrose-4-phosphate dehydrogenase
3.2.1.78	16832.5	14129	23917.9	23329.3	0.55714	0.0115379	0.0868619	mannan endo-1,4-beta-mannosidase
3.6.3.3	74733.8	63548.7	93383.5	98425.8	0.421574	0.0116353	0.0870264	Cd2+-exporting ATPase
2.7.6.2	16342.8	13352.2	22206.3	23905.9	0.58538	0.0117754	0.087688	thiamine diphosphokinase
1.2.1.26	201285	191785	182389	154947	-0.278209	0.011832	0.0877245	2,5-dioxovalerate dehydrogenase
1.18.1.-	364717	310207	316510	270529	-0.257722	0.0119117	0.0879316	With NAD(+) or NADP(+) as acceptor
4.2.1.96	730588	725467	724349	650529	-0.139147	0.0121181	0.0890677	4a-hydroxytetrahydrobiopterin dehydratase
4.1.1.19	355363	381376	445822	437723	0.207633	0.012336	0.0902786	arginine decarboxylase
1.1.99.1	1.03777e+06	1.02711e+06	1.04286e+06	815121	-0.212625	0.0124993	0.0910813	choline dehydrogenase
2.7.8.-	994435	992059	1.15007e+06	1.12147e+06	0.139365	0.0126654	0.0915064	Transferases for other substituted phosphate groups
1.8.1.8	243010	248861	305008	291558	0.223527	0.0126207	0.0915064	protein-disulfide reductase
1.1.5.-	468549	487256	558721	764865	0.424805	0.0128943	0.0919858	With a quinone or similar compound as acceptor
1.10.3.-	1.78036e+06	1.69846e+06	1.75783e+06	1.35552e+06	-0.220495	0.0128842	0.0919858	With oxygen as acceptor
5.4.4.3	17686.1	19564.5	26407.6	31034.8	0.575215	0.0128527	0.0919858	3-(hydroxyamino)phenol mutase
2.4.1.279	342.664	492.147	802.011	948.946	1.01642	0.0133298	0.093686	nigerose phosphorylase
3.5.2.-	674547	739405	674243	625927	-0.177332	0.0133305	0.093686	In cyclic amides
1.1.99.35	93526.7	87760.5	119959	118448	0.341951	0.0133534	0.093686	soluble quinoprotein glucose dehydrogenase
2.1.1.187	8273.26	9371.96	13474.5	14405.3	0.6074	0.0132644	0.093686	23S rRNA (guanine745-N1)-methyltransferase
2.6.1.85	314356	306982	367728	385906	0.226686	0.0142251	0.0993914	aminodeoxychorismate synthase
6.3.2.39	360.008	245.4	540.44	800.658	1.10867	0.0142869	0.0994138	aerobactin synthase
3.1.1.81	976886	911444	945900	831955	-0.143413	0.0143545	0.0994769	quorum-quenching N-acyl-homoserine lactonase
4.1.1.95	37653.8	42211.8	57318.4	56354.9	0.45438	0.0144689	0.0998617	L-glutamyl-[BtrI acyl-carrier protein] decarboxylase
2.1.1.132	223013	178573	183437	122789	-0.453915	0.0145911	0.100298	precorrin-6B C5,15-methyltransferase (decarboxylating)
2.4.1.15	274372	230038	237409	174799	-0.35177	0.0150123	0.102218	alpha,alpha-trehalose-phosphate synthase (UDP-forming)
3.6.3.36	265973	261587	251602	217136	-0.22799	0.0151113	0.102218	taurine-transporting ATPase
3.5.1.24	9093.22	12548.1	15958.2	20920.9	0.72053	0.0150915	0.102218	choloylglycine hydrolase
1.1.1.29	240409	226140	219764	189852	-0.244778	0.0153789	0.103616	glycerate dehydrogenase
3.1.3.1	465085	580276	637622	770705	0.380071	0.0154696	0.103815	alkaline phosphatase
6.2.1.19	31878.5	35383.1	52377.6	44357.9	0.46524	0.0157131	0.104954	long-chain-fatty-acid---luciferin-component ligase
2.7.1.22	19043.5	19721.7	27992.5	29151.1	0.507275	0.0157631	0.104954	ribosylnicotinamide kinase
3.2.1.3	167611	161094	154173	104939	-0.407135	0.0158854	0.105005	glucan 1,4-alpha-glucosidase
5.3.2.-	554834	549846	553083	414728	-0.252313	0.0158944	0.105005	Interconverting keto- and enol-groups
2.5.1.83	751.93	935.398	1388.7	1915.49	0.923388	0.0160952	0.10551	hexaprenyl-diphosphate synthase [(2E,6E)-farnesyl-diphosphate specific]
1.11.1.-	1.40152e+06	1.35814e+06	1.40104e+06	1.20951e+06	-0.137437	0.0160595	0.10551	Peroxidases
3.6.1.63	193661	194645	173376	164629	-0.255052	0.0163356	0.106674	alpha-D-ribose 1-methylphosphonate 5-triphosphate diphosphatase
4.2.1.53	44029.3	36394.4	33880.7	20073.4	-0.642276	0.0169384	0.109817	oleate hydratase
2.6.1.13	200687	175076	175387	139808	-0.312229	0.0171896	0.110538	ornithine aminotransferase
2.5.1.-	3.85544e+06	3.77785e+06	3.86452e+06	3.44157e+06	-0.119717	0.0172527	0.110538	Transferring alkyl or aryl groups, other than methyl groups
1.1.1.1	3.00025e+06	2.93257e+06	3.0297e+06	2.55941e+06	-0.144094	0.0172232	0.110538	alcohol dehydrogenase
1.14.99.44	10641.7	8138.05	14399.1	15087	0.60108	0.017881	0.114133	diapolycopene oxygenase
2.7.1.50	77665.8	53816.3	51846.3	43272.4	-0.522453	0.0181224	0.11524	hydroxyethylthiazole kinase
2.7.8.23	166400	164715	153747	130752	-0.276819	0.0184968	0.115854	carboxyvinyl-carboxyphosphonate phosphorylmutase
3.1.1.11	24835.6	21016.1	32678.5	34442.5	0.499315	0.0183411	0.115854	pectinesterase
1.1.1.320	13664.2	12051.6	18569.2	20265.1	0.544837	0.0187279	0.115854	benzil reductase [(S)-benzoin forming]
3.5.1.44	57941	58671.2	76845.1	82671.8	0.400584	0.0188331	0.115854	protein-glutamine glutaminase
3.4.24.76	2635.36	3453.48	5113.53	5129.49	0.694956	0.018766	0.115854	flavastacin
5.5.1.16	151.15	425.218	1092.52	559.278	1.43978	0.0183618	0.115854	halimadienyl-diphosphate synthase
2.5.1.42	79063.7	77094.5	110666	95278.2	0.341806	0.0187819	0.115854	geranylgeranylglycerol-phosphate geranylgeranyltransferase
3.5.1.110	1.14956e+06	1.14133e+06	1.16945e+06	935218	-0.182	0.0188062	0.115854	peroxyureidoacrylate/ureidoacrylate amidohydrolase
3.4.14.12	413853	437943	495262	544602	0.236648	0.0190047	0.116488	Xaa-Xaa-Pro tripeptidyl-peptidase
2.3.2.16	29153.2	31645.2	43511	42823.5	0.451373	0.0192999	0.11703	lipid II:glycine glycyltransferase
2.6.1.98	199982	206419	190368	164131	-0.255006	0.0191948	0.11703	UDP-2-acetamido-2-deoxy-ribo-hexuluronate aminotransferase
2.4.99.15	552.801	717.85	1706.74	938.84	0.985594	0.0192845	0.11703	(Kdo)3-lipid IVA (2-4) 3-deoxy-D-manno-octulosonic acid transferase
2.1.1.163	5.24064e+06	5.02529e+06	5.22141e+06	4.59422e+06	-0.121379	0.0195015	0.117832	demethylmenaquinone methyltransferase
2.4.1.102	1388.56	1232.6	2961.76	1868.49	0.81603	0.0205132	0.121777	beta-1,3-galactosyl-O-glycosyl-glycoprotein beta-1,6-N-acetylglucosaminyltransferase
5.1.2.3	688631	670977	670860	623677	-0.125991	0.0204914	0.121777	3-hydroxybutyryl-CoA epimerase
2.4.1.150	1388.56	1232.6	2961.76	1868.49	0.81603	0.0205132	0.121777	N-acetyllactosaminide beta-1,6-N-acetylglucosaminyl-transferase
3.5.2.5	332962	317869	311165	281896	-0.189899	0.0203524	0.121777	allantoinase
3.5.1.9	1.26484e+06	1.34017e+06	1.26049e+06	1.19395e+06	-0.141328	0.0206283	0.122034	arylformamidase
4.2.1.17	3.20133e+06	3.07748e+06	3.11211e+06	2.91729e+06	-0.11336	0.0209792	0.123154	enoyl-CoA hydratase
4.2.3.96	625.914	554.664	1305.82	922.567	0.854162	0.020971	0.123154	avermitilol synthase
3.5.1.32	332960	302971	311655	246295	-0.247994	0.0210353	0.123154	hippurate hydrolase
3.1.3.39	12267.8	13222.5	18708.3	19231.3	0.520442	0.0214021	0.123706	streptomycin-6-phosphatase
3.1.3.27	109184	128646	157545	152996	0.329216	0.021288	0.123706	phosphatidylglycerophosphatase
2.7.1.166	11286.8	13801.6	18188.3	20570.9	0.575852	0.021421	0.123706	3-deoxy-D-manno-octulosonic acid kinase
3.4.11.9	226464	278470	311771	350990	0.340599	0.0213416	0.123706	Xaa-Pro aminopeptidase
6.3.2.7	1050.23	1317.17	2358.27	1887.09	0.781026	0.0215093	0.123795	UDP-N-acetylmuramoyl-L-alanyl-D-glutamate---L-lysine ligase
1.3.3.11	269710	272889	264104	216990	-0.232647	0.0216782	0.124198	pyrroloquinoline-quinone synthase
1.3.1.9	922179	860113	898461	787757	-0.136469	0.0217256	0.124198	enoyl-[acyl-carrier-protein] reductase (NADH)
3.1.7.2	23830.4	23664.7	31070.7	40724.4	0.55043	0.0220199	0.125458	guanosine-3',5'-bis(diphosphate) 3'-diphosphatase
4.1.1.12	37342.1	41209	50560.5	65915.7	0.521595	0.0222538	0.126076	aspartate 4-decarboxylase
5.1.3.3	301788	295387	364625	338823	0.181001	0.0222769	0.126076	aldose 1-epimerase
1.1.1.81	436072	402674	406729	369467	-0.167244	0.0224815	0.126112	hydroxypyruvate reductase
3.5.1.28	688326	636979	655614	597688	-0.135938	0.0225061	0.126112	N-acetylmuramoyl-L-alanine amidase
1.3.3.4	311703	329863	402599	359545	0.191368	0.0224405	0.126112	protoporphyrinogen oxidase
2.7.1.12	357676	328347	339105	264121	-0.245306	0.0228952	0.12787	gluconokinase
1.2.1.83	136941	147779	173952	192572	0.313217	0.0233028	0.12972	3-succinoylsemialdehyde-pyridine dehydrogenase
2.4.2.45	157453	159744	191098	211413	0.293018	0.0233881	0.129769	decaprenyl-phosphate phosphoribosyltransferase
4.1.1.4	347697	290174	307196	206079	-0.376632	0.0235056	0.129997	acetoacetate decarboxylase
2.3.1.41	212175	204138	196626	170952	-0.236653	0.0236246	0.130231	beta-ketoacyl-[acyl-carrier-protein] synthase I
1.14.13.113	238878	225320	222601	188094	-0.234347	0.0237189	0.130327	FAD-dependent urate hydroxylase
3.1.1.5	167314	155611	152274	123159	-0.288291	0.0241478	0.132256	lysophospholipase
3.6.3.32	34974.4	38941.9	49893.1	54490.3	0.446123	0.024262	0.132279	quaternary-amine-transporting ATPase
4.1.2.48	279537	253718	260689	198715	-0.275319	0.024386	0.132279	low-specificity L-threonine aldolase
4.1.2.-	1.68488e+06	1.65906e+06	1.7068e+06	1.48758e+06	-0.123184	0.0244637	0.132279	Aldehyde-lyases
3.4.19.3	154339	149801	139046	123833	-0.266763	0.0243928	0.132279	pyroglutamyl-peptidase I
6.3.2.31	297312	276508	269150	250240	-0.19861	0.0246472	0.132428	coenzyme F420-0:L-glutamate ligase
6.3.2.34	297312	276508	269150	250240	-0.19861	0.0246472	0.132428	coenzyme F420-1:gamma-L-glutamate ligase
3.6.1.55	320402	310861	381616	357691	0.172966	0.0249878	0.132518	8-oxo-dGTP diphosphatase
3.2.1.37	308272	258189	357240	331273	0.227508	0.0250016	0.132518	xylan 1,4-beta-xylosidase
1.3.8.3	545176	513912	503450	487328	-0.149987	0.024936	0.132518	(R)-benzylsuccinyl-CoA dehydrogenase
5.1.3.20	215545	199835	201150	146540	-0.318342	0.0249621	0.132518	ADP-glyceromanno-heptose 6-epimerase
3.2.1.99	38985.8	30564.4	49293	49637.8	0.457289	0.0250542	0.132518	arabinan endo-1,5-alpha-L-arabinanase
3.5.1.87	630687	596992	608113	555811	-0.132407	0.0254268	0.134071	N-carbamoyl-L-amino-acid hydrolase
1.4.99.1	530218	514114	522764	456818	-0.149301	0.0257723	0.135472	D-amino-acid dehydrogenase
3.1.3.70	6536.36	10149.9	12707	15417.7	0.70156	0.0260262	0.135645	mannosyl-3-phosphoglycerate phosphatase
1.1.1.38	488131	473684	486750	374789	-0.219397	0.0262538	0.135645	malate dehydrogenase (oxaloacetate-decarboxylating)
2.6.1.45	371532	356031	358215	310112	-0.17964	0.0262845	0.135645	serine---glyoxylate transaminase
5.2.1.2	401348	410147	395823	357251	-0.164284	0.0261577	0.135645	maleylacetoacetate isomerase
1.14.19.8	18015.4	20371.9	15912.4	11558.7	-0.546204	0.0258866	0.135645	pentalenolactone synthase
1.16.8.1	166953	153507	150636	86063.2	-0.505393	0.0261682	0.135645	cob(II)yrinic acid a,c-diamide reductase
3.4.24.31	479.543	576.598	816.688	1269.11	0.937822	0.026425	0.135956	mycolysin
2.2.1.6	3.29425e+06	3.36924e+06	3.26587e+06	3.11285e+06	-0.117958	0.0265884	0.136384	acetolactate synthase
4.1.3.3	27104.9	30593.2	40450.1	41092.7	0.445057	0.0267417	0.136757	N-acetylneuraminate lyase
2.4.1.4	6182.66	4457.06	8567.39	8261.78	0.609828	0.0268394	0.136845	amylosucrase
2.4.1.289	551377	519814	646082	578668	0.137259	0.0271413	0.13797	N-acetylglucosaminyl-diphospho-decaprenol L-rhamnosyltransferase
3.1.1.10	90320.6	100726	117842	140143	0.383956	0.0276179	0.139186	tropinesterase
1.4.7.1	128.168	223.725	374.566	380.812	1.04483	0.0276289	0.139186	glutamate synthase (ferredoxin)
2.7.1.63	450265	437893	447331	368383	-0.181423	0.0274924	0.139186	polyphosphate---glucose phosphotransferase
1.14.11.-	998909	1.03525e+06	990360	943667	-0.127897	0.0277084	0.139186	With 2-oxoglutarate as one donor, and incorporation of one atom each of oxygen into both donors
1.1.1.336	192487	185903	181007	149455	-0.253924	0.0280591	0.140139	UDP-N-acetyl-D-mannosamine dehydrogenase
2.1.1.191	349486	381799	435418	433906	0.195213	0.0280633	0.140139	23S rRNA (cytosine1962-C5)-methyltransferase
2.4.1.52	152.193	265.498	382.108	532.838	1.08457	0.0281784	0.140239	poly(glycerol-phosphate) alpha-glucosyltransferase
5.4.99.16	473272	452691	461697	403230	-0.155232	0.0282484	0.140239	maltose alpha-D-glucosyltransferase
2.7.8.15	481.21	552.047	1260.9	744.798	0.88819	0.0290273	0.143267	UDP-N-acetylglucosamine---dolichyl-phosphate N-acetylglucosaminephosphotransferase
5.4.99.19	6023.04	5407.02	7518.72	11328.5	0.68059	0.0300188	0.146502	16S rRNA pseudouridine516 synthase
2.2.1.1	1.70699e+06	1.73813e+06	1.75944e+06	1.52729e+06	-0.125476	0.0302899	0.146502	transketolase
3.1.4.3	1.21323e+06	1.06994e+06	1.11909e+06	630759	-0.452121	0.0299838	0.146502	phospholipase C
3.2.1.132	12228.5	14808.3	21592.7	18512.7	0.509515	0.0303649	0.146502	chitosanase
2.5.1.32	406437	410745	407700	348017	-0.170796	0.0301806	0.146502	15-cis-phytoene synthase
1.4.1.24	805.632	516.64	1769.61	937.655	0.966125	0.0298915	0.146502	3-dehydroquinate synthase II
3.5.1.97	138817	138325	174462	166768	0.245481	0.0304593	0.146502	acyl-homoserine-lactone acylase
3.4.17.-	412946	450992	509744	510365	0.185613	0.0303994	0.146502	Metallocarboxypeptidases
2.3.1.174	604893	512502	526851	495216	-0.182361	0.0302087	0.146502	3-oxoadipyl-CoA thiolase
4.1.1.70	32063.4	38260.2	45440.5	58198	0.511578	0.0305993	0.14676	glutaconyl-CoA decarboxylase
2.7.8.20	203.26	192.049	455.183	321.248	0.91122	0.0308364	0.147481	phosphatidylglycerol---membrane-oligosaccharide glycerophosphotransferase
6.3.2.29	71985	67895.5	90752.7	91970.6	0.332981	0.0311372	0.148085	cyanophycin synthase (L-aspartate-adding)
6.3.2.30	71985	67895.5	90752.7	91970.6	0.332981	0.0311372	0.148085	cyanophycin synthase (L-arginine-adding)
1.14.12.13	88230.6	77711.4	74028.2	60863.5	-0.35673	0.0313559	0.148442	2-halobenzoate 1,2-dioxygenase
2.7.1.11	462918	433311	516500	526304	0.166257	0.0313872	0.148442	6-phosphofructokinase
3.4.21.62	307983	306183	353896	390000	0.225908	0.0315234	0.148672	subtilisin
1.2.1.8	248940	235663	285887	296557	0.213454	0.0318794	0.149723	betaine-aldehyde dehydrogenase
3.5.1.79	44923.7	37019.3	36117	19992.8	-0.614548	0.0319225	0.149723	phthalyl amidase
1.2.1.50	27865.1	29447.9	40104	39230.8	0.414605	0.0320175	0.149755	long-chain-fatty-acyl-CoA reductase
3.1.2.12	107518	120058	103085	86817.3	-0.320324	0.0323615	0.150948	S-formylglutathione hydrolase
3.2.1.4	433683	397853	507907	454004	0.154291	0.0328713	0.152488	cellulase
1.4.1.20	369.186	493.784	644.433	1122.75	0.993031	0.0328033	0.152488	phenylalanine dehydrogenase
3.1.27.9	1176.29	1320.98	2748.67	1706.5	0.767795	0.032965	0.152506	tRNA-intron endonuclease
4.2.1.44	217095	222366	281097	245832	0.204462	0.0331792	0.153079	myo-inosose-2 dehydratase
1.14.12.7	567641	633201	554913	547080	-0.178665	0.0335456	0.154351	phthalate 4,5-dioxygenase
2.1.1.61	11740.4	14408.6	17166.3	24041.4	0.610459	0.0339402	0.155324	tRNA (5-methylaminomethyl-2-thiouridylate)-methyltransferase
1.5.-.-	11740.4	14408.6	17166.3	24041.4	0.610459	0.0339402	0.155324	Acting on the CH-NH group of donors
2.7.11.32	220966	207115	207162	172026	-0.233085	0.0343217	0.156228	[pyruvate, phosphate dikinase] kinase
2.7.4.27	220966	207115	207162	172026	-0.233085	0.0343217	0.156228	[pyruvate, phosphate dikinase]-phosphate phosphotransferase
2.7.8.38	7839.78	7424.71	9357.09	16999.9	0.751475	0.0349455	0.157798	archaetidylserine synthase
2.7.1.90	384561	358803	367704	318760	-0.171737	0.0349219	0.157798	diphosphate---fructose-6-phosphate 1-phosphotransferase
3.5.99.6	211064	222322	269270	249945	0.204723	0.0349161	0.157798	glucosamine-6-phosphate deaminase
1.5.1.42	174708	146457	149902	123220	-0.291206	0.0352757	0.158019	FMN reductase (NADH)
1.1.1.82	21778.2	26845.3	17468.8	18405.8	-0.492361	0.0354243	0.158019	malate dehydrogenase (NADP+)
3.8.1.9	7730.12	7406.76	6392.43	3592	-0.669424	0.0354946	0.158019	(R)-2-haloacid dehalogenase
2.7.1.69	51144.2	52999.8	67918.7	71418.3	0.367738	0.0354962	0.158019	protein-Npi-phosphohistidine---sugar phosphotransferase
2.7.1.163	9093.44	9225.81	13389.9	13242.9	0.486043	0.0365873	0.162193	hygromycin B 4-O-kinase
5.1.2.2	426745	428524	419310	384658	-0.145118	0.0371735	0.164362	mandelate racemase
1.17.99.5	3585.45	3604.76	5620.24	5303.62	0.54834	0.0373051	0.164515	bile-acid 7alpha-dehydroxylase
1.17.1.2	816725	767722	789332	731328	-0.114304	0.0387325	0.170368	4-hydroxy-3-methylbut-2-enyl diphosphate reductase
3.5.3.-	322021	290635	303622	247478	-0.211078	0.0395992	0.173282	In linear amidines
1.3.1.34	254329	253981	301446	299091	0.186951	0.0395603	0.173282	2,4-dienoyl-CoA reductase (NADPH)
1.5.3.6	227593	232167	260098	342162	0.343707	0.0403277	0.175504	(R)-6-hydroxynicotine oxidase
1.8.1.7	259945	291384	259809	234961	-0.213394	0.0403757	0.175504	glutathione-disulfide reductase
1.1.1.61	579.909	600.976	963.398	1083.53	0.742989	0.0404171	0.175504	4-hydroxybutyrate dehydrogenase
1.2.1.78	92806.2	98330.4	86296.5	74471	-0.307703	0.0405579	0.175652	2-formylbenzoate dehydrogenase
3.4.24.25	443.128	621.401	867.041	1092.75	0.831453	0.040658	0.175652	vibriolysin
2.5.1.3	751916	736628	756369	674437	-0.113547	0.0407889	0.17577	thiamine-phosphate diphosphorylase
2.7.1.87	23032.3	21697.8	29644.5	32857.3	0.432695	0.0413799	0.177416	streptomycin 3''-kinase
1.2.1.4	63317.1	55103.9	81770.9	73658.6	0.337182	0.0419321	0.179331	aldehyde dehydrogenase (NADP+)
6.3.-.-	476030	398225	423624	371389	-0.192664	0.0424095	0.180146	Forming carbon-nitrogen bonds
1.1.1.30	526845	541624	532978	479015	-0.135012	0.042441	0.180146	3-hydroxybutyrate dehydrogenase
2.1.1.152	56639	59076.5	51976	41061	-0.375163	0.0427544	0.181024	precorrin-6A synthase (deacetylating)
1.14.18.1	81800.5	88212.8	73819.2	68177	-0.316098	0.0430417	0.181116	tyrosinase
3.1.1.61	848334	864598	1.00411e+06	919128	0.111003	0.043203	0.181116	protein-glutamate methylesterase
3.13.1.3	1214.69	1063.23	1861.99	1873.04	0.661189	0.0431388	0.181116	2'-hydroxybiphenyl-2-sulfinate desulfinase
2.1.1.206	817.375	674.256	1331.72	1194.13	0.705626	0.0429855	0.181116	tRNA (cytidine56-2'-O)-methyltransferase
2.4.2.22	217333	191898	195137	167859	-0.229556	0.0434213	0.181583	xanthine phosphoribosyltransferase
1.1.1.22	899870	917601	918961	829139	-0.112629	0.0435928	0.181853	UDP-glucose 6-dehydrogenase
3.1.4.46	451444	488914	535859	586264	0.203437	0.0446136	0.185201	glycerophosphodiester phosphodiesterase
3.5.4.29	454.812	525.988	1283.83	635.749	0.89481	0.0445244	0.185201	GTP cyclohydrolase IIa
1.1.1.46	14345.3	15895.9	21920.1	20729.2	0.440139	0.0448579	0.185309	L-arabinose 1-dehydrogenase
1.1.1.11	2665.67	2225.61	3760.61	3865.22	0.589406	0.0448088	0.185309	D-arabinitol 4-dehydrogenase
5.4.99.21	9989.09	14786	17051.7	22179.2	0.613801	0.0450063	0.185471	23S rRNA pseudouridine2604 synthase
2.5.1.16	578412	617416	675257	735706	0.187166	0.0452648	0.185635	spermidine synthase
2.7.7.19	58209.8	56468	68323.6	91606.1	0.435015	0.0454227	0.185834	polynucleotide adenylyltransferase
2.3.1.102	402.429	451.043	561.585	1173.38	0.989504	0.0457569	0.186697	N6-hydroxylysine N-acetyltransferase
3.7.1.9	601547	600464	603836	547102	-0.11882	0.0458537	0.186697	2-hydroxymuconate-6-semialdehyde hydrolase
5.4.4.4	2738.24	3299.84	4528.8	4827.64	0.578776	0.0464191	0.187874	geraniol isomerase
3.1.30.2	699.46	1378.54	2189.39	1756.71	0.859891	0.0464747	0.187874	Serratia marcescens nuclease
4.2.1.127	2738.24	3299.84	4528.8	4827.64	0.578776	0.0464191	0.187874	linalool dehydratase
1.2.1.62	191065	195948	180540	166867	-0.211602	0.0466136	0.187988	4-formylbenzenesulfonate dehydrogenase
1.1.3.6	129660	128681	158712	157902	0.239986	0.0469929	0.188022	cholesterol oxidase
3.5.1.4	1.64993e+06	1.67008e+06	1.67844e+06	1.53639e+06	-0.102459	0.0471757	0.188022	amidase
6.3.2.36	3943.93	7147.4	8334.6	10857.4	0.740196	0.0468475	0.188022	4-phosphopantoate---beta-alanine ligase
1.3.1.83	3405.01	4712	7522.09	5432.49	0.608992	0.0469142	0.188022	geranylgeranyl diphosphate reductase
2.5.-.-	193456	212322	241129	254470	0.235829	0.0470765	0.188022	Transferring alkyl or aryl groups, other than methyl groups
4.3.1.1	144617	151261	169363	220384	0.351215	0.0474214	0.188153	aspartate ammonia-lyase
1.1.1.60	942490	1.0073e+06	938869	910096	-0.131447	0.0474303	0.188153	2-hydroxy-3-oxopropionate reductase
2.1.1.173	69020.2	78416.9	93599.1	98931.7	0.332084	0.0476515	0.18859	23S rRNA (guanine2445-N2)-methyltransferase
4.1.2.21	44581	45500.3	59695.8	59159.2	0.34609	0.0484601	0.191344	2-dehydro-3-deoxy-6-phosphogalactonate aldolase
2.6.1.18	232716	211004	207597	193117	-0.201671	0.048865	0.192495	beta-alanine---pyruvate transaminase
2.6.1.-	1.57787e+06	1.54586e+06	1.57803e+06	1.45578e+06	-0.097643	0.0492253	0.193466	Transaminases
3.3.2.12	50058.6	49096.8	65044.9	64762.5	0.335269	0.049786	0.194767	oxepin-CoA hydrolase
1.17.1.7	50058.6	49096.8	65044.9	64762.5	0.335269	0.049786	0.194767	3-oxo-5,6-dehydrosuberyl-CoA semialdehyde dehydrogenase
1.14.13.2	357152	297600	317434	270652	-0.211268	0.0501391	0.195698	4-hydroxybenzoate 3-monooxygenase
1.13.11.64	45583.4	50384.5	41482.6	35928.8	-0.368341	0.0504298	0.196381	5-nitrosalicylate dioxygenase
1.1.1.159	166881	209382	162357	157757	-0.289316	0.0511177	0.198605	7alpha-hydroxysteroid dehydrogenase
2.4.1.293	36911.4	35004.5	31867.7	25215	-0.39281	0.0512858	0.198803	GalNAc5-diNAcBac-PP-undecaprenol beta-1,3-glucosyltransferase
2.7.1.51	8527.64	6265.42	11480.9	10421.4	0.512647	0.0515622	0.199419	L-fuculokinase
4.1.3.24	320803	291942	294385	271046	-0.170856	0.0520264	0.200302	malyl-CoA lyase
3.6.1.40	167651	160808	157001	135453	-0.224731	0.0520171	0.200302	guanosine-5'-triphosphate,3'-diphosphate phosphatase
4.1.1.17	353379	315743	335159	273019	-0.19602	0.0523734	0.200984	ornithine decarboxylase
4.1.3.6	291601	298866	284007	262109	-0.168533	0.0524403	0.200984	citrate (pro-3S)-lyase
2.7.7.1	32024.3	34366.7	42856.9	47140.2	0.387604	0.0529144	0.202344	nicotinamide-nucleotide adenylyltransferase
1.8.-.-	3.38864e+06	3.26045e+06	3.46151e+06	2.90958e+06	-0.119616	0.0531857	0.202469	Acting on a sulfur group of donors
4.2.1.131	2604.67	2951.67	6239.86	3257.37	0.700698	0.0531298	0.202469	carotenoid 1,2-hydratase
3.5.1.96	4166.38	3789.47	5599.19	6204.05	0.519543	0.0537679	0.204228	succinylglutamate desuccinylase
2.5.1.47	818104	880822	978218	957773	0.133825	0.0540706	0.204463	cysteine synthase
2.1.2.-	81269.3	80332.4	105725	97289.5	0.273497	0.0545444	0.205796	Hydroxymethyl-, formyl- and related transferases
4.2.1.137	1087.83	1544.74	2507.48	1925.35	0.687372	0.0547796	0.206225	sporulenol synthase
1.4.3.20	54073.5	58643.5	50886	40875.4	-0.357083	0.0557797	0.207233	L-lysine 6-oxidase
1.3.99.29	34237.3	42870.4	52615	52739.9	0.395069	0.0553719	0.207233	phytoene desaturase (zeta-carotene-forming)
1.1.1.302	303890	235571	259666	204168	-0.275933	0.0555791	0.207233	2,5-diamino-6-(ribosylamino)-4(3H)-pyrimidinone 5'-phosphate reductase
4.2.99.-	2.0723e+06	2.0667e+06	2.15579e+06	1.80364e+06	-0.122432	0.0555414	0.207233	Other carbon-oxygen lyases
3.4.24.33	20917.3	23038	28887.9	31876.4	0.415768	0.0556952	0.207233	peptidyl-Asp metalloendopeptidase
2.6.1.5	2747.37	3376.25	4122.94	5607.49	0.621666	0.0559433	0.207387	tyrosine transaminase
2.8.3.16	2.08791e+06	2.20596e+06	2.08213e+06	2.02554e+06	-0.118602	0.0561936	0.207861	formyl-CoA transferase
2.7.8.7	505337	479307	494811	442215	-0.127641	0.0565417	0.208259	holo-[acyl-carrier-protein] synthase
4.1.3.41	226633	217123	212072	192985	-0.187341	0.0565464	0.208259	3-hydroxy-D-aspartate aldolase
2.7.1.48	102012	116985	133448	145300	0.295906	0.0570213	0.209553	uridine kinase
3.5.1.19	380366	369814	373480	332630	-0.143784	0.0573456	0.21029	nicotinamidase
2.7.7.80	37900.6	43908.1	55801.9	53312.4	0.359547	0.0575387	0.210543	molybdopterin-synthase adenylyltransferase
1.1.1.23	638244	609018	624625	576718	-0.109368	0.0579199	0.211482	histidinol dehydrogenase
2.4.2.3	30361.7	32800.1	38978.6	48623.6	0.424135	0.0587254	0.211767	uridine phosphorylase
6.3.4.22	789.288	730.82	1879.47	917.461	0.806844	0.0587461	0.211767	tRNAIle2-agmatinylcytidine synthase
2.1.1.14	20704	28054.6	33467.5	36228.6	0.461669	0.0582674	0.211767	5-methyltetrahydropteroyltriglutamate---homocysteine S-methyltransferase
4.2.2.10	655.308	343.571	775.588	1140.62	0.90277	0.0581392	0.211767	pectin lyase
3.5.3.18	140492	125853	161550	164293	0.238933	0.0584986	0.211767	dimethylargininase
3.5.2.1	71695.1	74925.4	61403.4	61226	-0.311628	0.0583846	0.211767	barbiturase
4.2.1.116	1.97761e+06	2.02726e+06	2.02432e+06	1.8614e+06	-0.0995628	0.0593356	0.212538	3-hydroxypropionyl-CoA dehydratase
2.1.1.34	44164.5	38810.4	54393.7	55054.3	0.347577	0.059303	0.212538	tRNA (guanosine18-2'-O)-methyltransferase
1.1.1.-	6.8139e+06	6.64818e+06	6.86369e+06	6.2846e+06	-0.0897088	0.0592722	0.212538	With NAD(+) or NADP(+) as acceptor
3.2.1.10	14944.7	12458.9	22821.8	16583.7	0.463166	0.059546	0.212842	oligo-1,6-glucosidase
1.14.15.9	9979.67	7395.15	11348.5	14822	0.547686	0.0599517	0.213843	spheroidene monooxygenase
6.2.1.12	25848.4	31945.7	35801.8	47526.3	0.480671	0.0602097	0.213864	4-coumarate---CoA ligase
6.2.1.-	2.589e+06	2.4713e+06	2.58573e+06	2.34154e+06	-0.0942416	0.0601842	0.213864	Acid--thiol ligases
2.1.1.266	161725	142130	144112	123371	-0.240627	0.0608447	0.215461	23S rRNA (adenine2030-N6)-methyltransferase
6.3.2.19	523.708	660.423	2206.45	575.125	1.14268	0.060913	0.215461	ubiquitin---protein ligase
1.7.-.-	1.49174e+06	1.6449e+06	1.62333e+06	1.23733e+06	-0.194823	0.0614873	0.215695	Acting on other nitrogenous compounds as donors
3.1.4.52	447836	518890	573616	564036	0.179743	0.0612051	0.215695	cyclic-guanylate-specific phosphodiesterase
1.1.1.132	137169	159112	180619	186757	0.256578	0.0614646	0.215695	GDP-mannose 6-dehydrogenase
1.14.11.35	39024	42385.3	56343	50869	0.340193	0.0613542	0.215695	1-deoxypentalenic acid 11beta-hydroxylase
4.4.1.8	496229	481998	487149	447782	-0.120842	0.0619661	0.21648	cystathionine beta-lyase
2.8.1.1	1.11626e+06	1.05145e+06	1.1085e+06	992673	-0.100985	0.0623532	0.216939	thiosulfate sulfurtransferase
2.1.1.181	244.459	163.613	290.815	513.427	0.94342	0.062272	0.216939	23S rRNA (adenine1618-N6)-methyltransferase
1.14.13.107	587186	598482	563481	562558	-0.128037	0.0630791	0.21787	limonene 1,2-monooxygenase
1.97.1.9	9491.21	9957.42	13174.6	14260.1	0.444841	0.0631958	0.21787	selenate reductase
2.4.2.21	264616	227199	243731	193367	-0.228807	0.0632624	0.21787	nicotinate-nucleotide---dimethylbenzimidazole phosphoribosyltransferase
2.5.1.105	225540	227765	227776	176831	-0.224627	0.0629237	0.21787	7,8-dihydropterin-6-yl-methyl-4-(beta-D-ribofuranosyl)aminobenzene 5'-phosphate synthase
2.10.1.1	778570	730746	766221	692579	-0.104826	0.0635648	0.218072	molybdopterin molybdotransferase
1.14.13.7	243598	237028	242555	188366	-0.217826	0.0635778	0.218072	phenol 2-monooxygenase
2.1.1.161	47083.4	54897.3	43393.2	39663.8	-0.353385	0.06406	0.218571	dimethylglycine N-methyltransferase
3.8.1.10	744.189	585.355	462.395	381.099	-0.713293	0.064041	0.218571	2-haloacid dehalogenase (configuration-inverting)
3.4.11.24	63926.1	72767.6	83112.4	97011.6	0.347932	0.0641096	0.218571	aminopeptidase S
6.3.2.2	277289	277867	273947	240845	-0.165975	0.0648151	0.220534	glutamate---cysteine ligase
3.5.1.93	91032.3	115915	127575	143981	0.339964	0.0658482	0.223601	glutaryl-7-aminocephalosporanic-acid acylase
1.3.99.31	49308.9	57335.6	70305.4	69053.9	0.33079	0.0671872	0.226534	phytoene desaturase (lycopene-forming)
5.4.99.15	345573	350569	351509	297857	-0.158576	0.0672456	0.226534	(1->4)-alpha-D-glucan 1-alpha-D-glucosylmutase
2.8.3.5	558533	545845	571441	474587	-0.136786	0.0670266	0.226534	3-oxoacid CoA-transferase
1.14.11.21	950.178	1671.1	2773.95	1868.83	0.755661	0.0668843	0.226534	clavaminate synthase
6.3.2.-	429566	457072	510854	506189	0.143782	0.0676787	0.227541	Acid--amino-acid ligases (peptide synthases)
1.97.1.12	6531.7	10755	13310.3	13403.9	0.570493	0.0679715	0.227624	photosystem I
4.2.1.118	120774	108684	111295	84355.5	-0.290288	0.06785	0.227624	3-dehydroshikimate dehydratase
1.14.13.50	182902	187982	184237	145692	-0.22911	0.0683557	0.228121	pentachlorophenol monooxygenase
3.1.3.79	394.166	195.556	576.386	531.749	0.858913	0.0687916	0.228121	mannosylfructose-phosphate phosphatase
1.1.1.169	865210	845583	873793	789107	-0.0970538	0.0687266	0.228121	2-dehydropantoate 2-reductase
1.11.1.18	280802	272350	272742	241519	-0.161758	0.0684896	0.228121	bromide peroxidase
5.4.3.6	1112.83	1114.74	2109.03	1480.33	0.624425	0.0687625	0.228121	tyrosine 2,3-aminomutase
3.5.1.2	251494	202928	265998	292609	0.248992	0.0689344	0.228149	glutaminase
2.1.1.10	420962	419999	478124	480792	0.136162	0.0699052	0.230912	homocysteine S-methyltransferase
3.4.21.12	272.422	120.187	288.75	547.668	1.06433	0.0700794	0.231038	alpha-lytic endopeptidase
4.2.2.-	1.17121e+06	1.10134e+06	1.10268e+06	1.08716e+06	-0.106741	0.0705025	0.231223	Acting on polysaccharides
2.8.3.-	523596	476421	507537	439407	-0.135345	0.0703902	0.231223	CoA-transferases
4.6.1.1	6.42076e+06	6.33406e+06	6.73416e+06	5.17375e+06	-0.159883	0.0705442	0.231223	adenylate cyclase
1.1.99.28	207761	215190	256198	240110	0.175209	0.0710044	0.231836	glucose-fructose oxidoreductase
3.5.1.59	77318.2	79624.2	73324.1	59717.6	-0.297829	0.0709093	0.231836	N-carbamoylsarcosine amidase
4.1.2.41	365357	408438	356484	355726	-0.174057	0.0712821	0.231851	vanillin synthase
4.2.1.101	365357	408438	356484	355726	-0.174057	0.0712821	0.231851	trans-feruloyl-CoA hydratase
3.4.21.81	4412.34	4795.82	7770.47	5726.89	0.488931	0.0718011	0.232648	streptogrisin B
2.5.1.31	12821.1	11695.6	16520.9	17213.3	0.408995	0.0730585	0.236271	ditrans,polycis-undecaprenyl-diphosphate synthase [(2E,6E)-farnesyl-diphosphate specific]
2.4.2.44	12630.6	12666.2	14689.6	23372.2	0.548921	0.07405	0.239023	S-methyl-5'-thioinosine phosphorylase
2.1.1.257	1182.6	869.881	1660.05	1611.29	0.620297	0.0748583	0.240977	tRNA (pseudouridine54-N1)-methyltransferase
3.2.1.81	13637.3	11339.7	10938.3	8023.58	-0.458046	0.0749394	0.240977	beta-agarase
3.4.-.-	3.14464e+06	2.95187e+06	3.08051e+06	2.86686e+06	-0.090613	0.0752387	0.241068	Acting on peptide bonds (peptidases)
4.3.1.27	41486.2	41691.2	51095.9	58459.1	0.3478	0.0752516	0.241068	threo-3-hydroxy-D-aspartate ammonia-lyase
4.1.1.18	346526	313561	333825	276204	-0.17169	0.0754986	0.241311	lysine decarboxylase
1.6.99.-	1.18087e+06	1.1446e+06	1.21075e+06	1.04163e+06	-0.103472	0.0756117	0.241311	With other acceptors
4.1.1.76	352075	411724	346387	347596	-0.19293	0.0762756	0.241456	arylmalonate decarboxylase
2.1.1.77	1.22082e+06	1.25974e+06	1.22579e+06	1.17621e+06	-0.101261	0.0763682	0.241456	protein-L-isoaspartate(D-aspartate) O-methyltransferase
4.2.2.22	32391.8	20743.9	31973.1	49486.3	0.579025	0.0760349	0.241456	pectate trisaccharide-lyase
3.4.11.10	21867.3	23977.2	29135.8	33050.8	0.389282	0.0763237	0.241456	bacterial leucyl aminopeptidase
2.4.1.217	1141.7	1745.45	2675.15	2067.97	0.651932	0.0758416	0.241456	mannosyl-3-phosphoglycerate synthase
3.1.1.45	1.83204e+06	1.89132e+06	1.89605e+06	1.72622e+06	-0.0960479	0.0769166	0.242737	carboxymethylenebutenolidase
1.3.1.25	32074.7	39018	30282.4	26861.6	-0.373595	0.0770653	0.242756	1,6-dihydroxycyclohexa-2,4-diene-1-carboxylate dehydrogenase
4.1.99.18	1.22106e+06	1.22658e+06	1.2648e+06	1.11631e+06	-0.0967437	0.0774272	0.243444	cyclic pyranopterin phosphate synthase
5.99.1.4	540222	505904	542909	442067	-0.14556	0.0783456	0.243848	2-hydroxychromene-2-carboxylate isomerase
5.1.1.13	6240.55	9395.99	12986.4	10467.9	0.521861	0.0783882	0.243848	aspartate racemase
3.4.17.14	7953.74	7123.84	9595.42	12010.5	0.47283	0.0784175	0.243848	zinc D-Ala-D-Ala carboxypeptidase
1.17.1.-	380767	357783	381508	297798	-0.180522	0.0782935	0.243848	With NAD(+) or NADP(+) as acceptor
5.2.1.8	2.94036e+06	3.00697e+06	3.34972e+06	3.26213e+06	0.0984834	0.0782254	0.243848	peptidylprolyl isomerase
3.4.21.92	1.06785e+06	1.01264e+06	1.05774e+06	970063	-0.0924013	0.0779833	0.243848	endopeptidase Clp
5.1.3.2	4.35784e+06	4.35296e+06	4.45898e+06	4.0732e+06	-0.0858445	0.0793831	0.245706	UDP-glucose 4-epimerase
2.7.1.169	748.784	825.655	2082.02	860	0.823371	0.0794491	0.245706	pantoate kinase
2.3.1.12	1.31032e+06	1.24514e+06	1.29655e+06	1.19778e+06	-0.0901296	0.0792905	0.245706	dihydrolipoyllysine-residue acetyltransferase
1.11.1.17	79487.6	71564.4	71425.1	56025.2	-0.304491	0.0803293	0.247844	glutathione amide-dependent peroxidase
3.4.11.-	932268	848311	1.01401e+06	976844	0.107415	0.0805783	0.247844	Aminopeptidases
5.4.3.4	33921.6	26652.7	28306.9	16985.7	-0.485051	0.0805151	0.247844	D-lysine 5,6-aminomutase
1.1.3.-	749191	755171	785031	658604	-0.1179	0.081068	0.248899	With oxygen as acceptor
3.1.3.68	137055	91799.7	102224	82600.8	-0.364287	0.0820436	0.250987	2-deoxyglucose-6-phosphatase
3.1.4.17	1.07322e+06	1.00045e+06	1.09625e+06	810085	-0.18275	0.0819533	0.250987	3',5'-cyclic-nucleotide phosphodiesterase
6.3.4.21	411525	384538	398040	358747	-0.128753	0.0822819	0.251263	nicotinate phosphoribosyltransferase
2.7.1.21	121180	121824	139460	162366	0.263632	0.0828393	0.252511	thymidine kinase
3.5.3.8	32166.7	34529.5	50131.3	38553.5	0.349592	0.0832665	0.253358	formimidoylglutamase
2.1.1.209	944.475	968.89	2015.46	1161.26	0.662396	0.0837058	0.254239	23S rRNA (guanine2535-N1)-methyltransferase
2.7.4.-	124757	127345	141761	177683	0.294398	0.0842839	0.255083	Phosphotransferases with a phosphate group as acceptor
2.7.7.7	5.69527e+06	5.49399e+06	5.68443e+06	5.29243e+06	-0.0827566	0.084226	0.255083	DNA-directed DNA polymerase
1.1.1.312	189179	168319	169467	154494	-0.197122	0.0848179	0.256242	2-hydroxy-4-carboxymuconate semialdehyde hemiacetal dehydrogenase
1.3.8.1	1.19248e+06	1.2526e+06	1.2202e+06	1.14851e+06	-0.101312	0.0855868	0.258106	short-chain acyl-CoA dehydrogenase
1.2.4.1	1.57552e+06	1.5664e+06	1.57188e+06	1.49751e+06	-0.0884104	0.0865669	0.259951	pyruvate dehydrogenase (acetyl-transferring)
1.2.99.5	135823	115057	155971	148721	0.227052	0.0868111	0.259951	formylmethanofuran dehydrogenase
2.4.1.292	23880.3	27496.4	35166.1	33012.9	0.351828	0.0867839	0.259951	GalNAc-alpha-(1->4)-GalNAc-alpha-(1->3)-diNAcBac-PP-undecaprenol alpha-1,4-N-acetyl-D-galactosaminyltransferase
1.4.1.2	322337	297786	305667	276324	-0.14713	0.0865065	0.259951	glutamate dehydrogenase
3.3.2.10	1.56993e+06	1.49706e+06	1.77236e+06	1.61271e+06	0.0866953	0.08736	0.260276	soluble epoxide hydrolase
1.16.3.1	615744	661134	718690	734312	0.133031	0.0873794	0.260276	ferroxidase
2.3.1.57	138991	131980	166760	155883	0.196943	0.088032	0.26176	diamine N-acetyltransferase
2.5.1.17	766805	725508	768961	680655	-0.0982592	0.0887844	0.263536	cob(I)yrinic acid a,c-diamide adenosyltransferase
2.7.7.27	538264	546616	628408	583569	0.1042	0.089087	0.2636	glucose-1-phosphate adenylyltransferase
2.4.2.-	2.89446e+06	2.74435e+06	2.87318e+06	2.65112e+06	-0.084814	0.0891654	0.2636	Pentosyltransferases
1.3.1.86	257339	248585	242335	229532	-0.15517	0.0892719	0.2636	crotonyl-CoA reductase
1.1.1.133	407405	358783	385391	332271	-0.150902	0.0897492	0.264091	dTDP-4-dehydrorhamnose reductase
1.1.1.14	633320	655249	671628	558765	-0.125569	0.0896754	0.264091	L-iditol 2-dehydrogenase
2.4.1.291	48251.6	57673.7	65286.4	73555	0.338845	0.0902949	0.264323	N-acetylgalactosamine-N,N'-diacetylbacillosaminyl-diphospho-undecaprenol 4-alpha-N-acetylgalactosaminyltransferase
4.2.1.22	599116	581362	590262	553893	-0.100023	0.0902877	0.264323	cystathionine beta-synthase
3.2.1.8	143807	116447	159519	159154	0.240535	0.090115	0.264323	endo-1,4-beta-xylanase
1.8.1.16	22669.6	30284.5	23487.2	17610.8	-0.429743	0.0905167	0.264516	glutathione amide reductase
1.14.13.25	232173	237446	238007	191476	-0.188659	0.0907352	0.264692	methane monooxygenase (soluble)
3.2.1.18	46526.4	45049.5	57617.1	59312.5	0.300327	0.0908886	0.264692	exo-alpha-sialidase
1.1.1.274	1639.29	1356.17	1979.96	2694.14	0.598923	0.0912154	0.264695	2,5-didehydrogluconate reductase (2-dehydro-D-gluconate-forming)
4.1.2.34	1231.87	2113.36	2761.87	2668.25	0.640007	0.0911944	0.264695	4-(2-carboxyphenyl)-2-oxobut-3-enoate aldolase
4.1.99.19	44279.6	38680.5	38426.9	29754.5	-0.342525	0.0915134	0.264695	2-iminoacetate synthase
2.1.2.10	1.039e+06	998367	1.14125e+06	1.1167e+06	0.0946506	0.0914427	0.264695	aminomethyltransferase
1.2.1.71	16977.5	20047.2	25668.5	24134.8	0.371157	0.0921208	0.265999	succinylglutamate-semialdehyde dehydrogenase
3.5.4.16	764727	751613	751004	723692	-0.0944641	0.0924308	0.266441	GTP cyclohydrolase I
2.1.1.197	1.3289e+06	1.24941e+06	1.33868e+06	1.1714e+06	-0.0953459	0.0932482	0.267888	malonyl-[acyl-carrier protein] O-methyltransferase
1.1.2.6	339175	283533	367373	359998	0.171728	0.0931525	0.267888	polyvinyl alcohol dehydrogenase (cytochrome)
2.7.8.36	8974.32	11532.6	15119.4	13509	0.422556	0.0951297	0.26802	undecaprenyl phosphate N,N'-diacetylbacillosamine 1-phosphate transferase
3.4.16.-	229800	224759	282178	245081	0.156837	0.0949674	0.26802	Serine-type carboxypeptidases
4.1.1.50	198132	202700	190649	178560	-0.174008	0.0948217	0.26802	adenosylmethionine decarboxylase
2.4.1.264	3379.5	2907.66	5466.81	3806.49	0.498115	0.0952328	0.26802	D-Man-alpha-(1->3)-D-Glc-beta-(1->4)-D-Glc-alpha-1-diphosphoundecaprenol 2-beta-glucuronyltransferase
5.1.3.10	317683	355491	344213	267283	-0.200188	0.0938548	0.26802	CDP-paratose 2-epimerase
1.2.1.67	47281.2	41075.2	54588.3	59698.1	0.321632	0.0936275	0.26802	vanillin dehydrogenase
2.4.1.281	5157.42	3940.53	8436.54	5250.35	0.524789	0.0935509	0.26802	4-O-beta-D-mannosyl-D-glucose phosphorylase
4.5.1.3	1010.14	1334.5	1515.7	2319.37	0.665633	0.0953467	0.26802	dichloromethane dehalogenase
3.2.1.73	131884	134795	169535	148945	0.198836	0.0948195	0.26802	licheninase
5.1.1.-	641297	602638	640641	562414	-0.104764	0.0943066	0.26802	Acting on amino acids and derivatives
1.14.15.-	4070.13	4122.94	5845.64	5631.59	0.431835	0.095254	0.26802	With reduced iron-sulfur protein as one donor, and incorporation of one atom of oxygen
5.1.1.5	342.159	461.544	265.537	248.955	-0.700138	0.0952563	0.26802	lysine racemase
4.1.1.5	66071.1	78234.4	66461.9	55268	-0.305533	0.09507	0.26802	acetolactate decarboxylase
3.2.1.177	163460	156214	197391	178873	0.179346	0.0957283	0.268648	alpha-D-xyloside xylohydrolase
1.7.2.2	58958.8	86528.5	82951.2	129154	0.499588	0.0960266	0.269041	nitrite reductase (cytochrome; ammonia-forming)
1.17.4.1	739740	767904	851266	831210	0.103904	0.0977736	0.272833	ribonucleoside-diphosphate reductase
3.2.1.32	1221.77	1081.24	1709.62	1770.61	0.544572	0.0980228	0.272833	endo-1,3-beta-xylanase
1.1.1.95	1.69781e+06	1.69266e+06	1.69345e+06	1.62325e+06	-0.0863041	0.0979925	0.272833	phosphoglycerate dehydrogenase
5.3.1.8	578218	593088	614559	494337	-0.138794	0.0982989	0.273153	mannose-6-phosphate isomerase
2.5.1.87	1264.33	967.16	956.286	406.845	-0.784759	0.0993174	0.275083	ditrans,polycis-polyprenyl diphosphate synthase [(2E,6E)-farnesyl diphosphate specific]
2.1.1.238	4888.66	7584.94	5153.55	3847.94	-0.535989	0.0992487	0.275083	mycinamicin VI 2''-O-methyltransferase
1.14.11.33	230631	224863	222419	201877	-0.158287	0.100236	0.277176	DNA oxidative demethylase
2.7.1.113	107830	135248	148986	155084	0.26879	0.100462	0.277348	deoxyguanosine kinase
1.10.9.1	293717	284329	338592	320337	0.134258	0.101128	0.277943	plastoquinol---plastocyanin reductase
1.5.1.20	779748	736649	757168	719929	-0.09221	0.101168	0.277943	methylenetetrahydrofolate reductase [NAD(P)H]
3.6.3.44	15577.2	18949.2	21774.2	25547.2	0.404257	0.101076	0.277943	xenobiotic-transporting ATPase
1.1.2.-	89565.7	82611	104670	105934	0.238301	0.101903	0.279508	With a cytochrome as acceptor
2.3.1.191	1726.4	2146.68	2783.79	2986.42	0.521814	0.102257	0.279791	UDP-3-O-(3-hydroxymyristoyl)glucosamine N-acyltransferase
5.4.2.9	22175.4	33378.2	33189.4	48788.9	0.515309	0.102335	0.279791	phosphoenolpyruvate mutase
1.14.12.10	200370	210894	200180	179218	-0.173333	0.102769	0.280022	benzoate 1,2-dioxygenase
5.4.99.-	955521	932993	1.07332e+06	1.00663e+06	0.0842956	0.102798	0.280022	Transferring other groups
1.1.9.1	1.6406e+06	1.51365e+06	1.79827e+06	1.68604e+06	0.0890575	0.102915	0.280022	alcohol dehydrogenase (azurin)
1.14.13.172	107688	113978	102126	94997.7	-0.225222	0.103651	0.281574	salicylate 5-hydroxylase
1.14.13.70	21646.2	23756.2	28796.1	31100.5	0.347729	0.104195	0.282601	sterol 14alpha-demethylase
4.1.3.38	24240.1	20030.3	29599.2	28674.1	0.343858	0.104806	0.283805	aminodeoxychorismate lyase
3.1.22.-	2828.91	6045.71	6141.74	8803.13	0.702292	0.104992	0.283855	Endodeoxyribonucleases producing other than 5'-phosphomonoesters
2.7.1.58	35909.5	39895.5	51390.8	45977	0.303687	0.105539	0.284881	2-dehydro-3-deoxygalactonokinase
6.2.1.20	333769	313097	336978	258129	-0.180722	0.10577	0.285051	long-chain-fatty-acid---[acyl-carrier-protein] ligase
3.4.22.37	725.286	1274.66	1308.71	2159.76	0.750193	0.106818	0.287417	gingipain R
1.14.13.142	69457.2	60871.1	78946.5	84383.1	0.275301	0.107893	0.289853	3-ketosteroid 9alpha-monooxygenase
3.1.1.31	1.44441e+06	1.44167e+06	1.52779e+06	1.25531e+06	-0.11138	0.108439	0.290859	6-phosphogluconolactonase
4.99.1.4	339168	304097	314875	291096	-0.140839	0.108923	0.291696	sirohydrochlorin ferrochelatase
4.2.1.79	357678	386440	370262	333655	-0.137148	0.109288	0.292211	2-methylcitrate dehydratase
2.3.1.40	328165	309761	332786	254809	-0.179038	0.109637	0.292589	acyl-[acyl-carrier-protein]---phospholipid O-acyltransferase
2.4.1.266	71184.2	67187.4	81122.5	92508	0.278337	0.109774	0.292589	glucosyl-3-phosphoglycerate synthase
1.1.1.40	284975	275442	281737	246380	-0.142553	0.110136	0.293095	malate dehydrogenase (oxaloacetate-decarboxylating) (NADP+)
2.4.1.60	3410.16	3198.62	4648.86	4613.74	0.433977	0.110578	0.293809	abequosyltransferase
2.3.2.3	93842.7	74180.9	102932	107160	0.272152	0.11085	0.294073	lysyltransferase
3.2.1.80	42341.5	36255.9	58512.6	44009.5	0.323255	0.111278	0.294748	fructan beta-fructosidase
2.1.1.180	9607.7	13008.5	14653.7	17116.3	0.43874	0.111469	0.294793	16S rRNA (adenine1408-N1)-methyltransferase
3.5.99.7	84500.7	77607.4	98465.7	99641.5	0.237018	0.112492	0.296834	1-aminocyclopropane-1-carboxylate deaminase
1.1.99.22	53982.5	62675.3	66745.8	87075.6	0.351835	0.11259	0.296834	glycerol dehydrogenase (acceptor)
2.1.1.269	47804.7	40897.4	52188.1	63324.9	0.334474	0.112869	0.297109	dimethylsulfoniopropionate demethylase
2.1.1.72	1.39563e+06	1.3953e+06	1.46782e+06	1.25081e+06	-0.0958075	0.113323	0.29784	site-specific DNA-methyltransferase (adenine-specific)
2.1.1.63	1.1597e+06	1.10236e+06	1.17861e+06	1.03508e+06	-0.0878271	0.113917	0.298214	methylated-DNA---[protein]-cysteine S-methyltransferase
4.2.3.98	789.124	1092.46	2342.85	996.038	0.748603	0.114284	0.298214	(+)-T-muurolol synthase
2.7.3.-	500966	491987	521886	421878	-0.132581	0.114343	0.298214	Phosphotransferases with a nitrogenous group as acceptor
2.1.1.98	1202.05	1162.19	2180.64	1445.11	0.552471	0.114248	0.298214	diphthine synthase
1.6.-.-	813950	828808	871298	697354	-0.126473	0.115277	0.298813	Acting on NADH or NADPH
2.5.1.98	1432.29	1285.07	2116.59	1883.19	0.502164	0.114761	0.298813	Rhizobium leguminosarum exopolysaccharide glucosyl ketal-pyruvate-transferase
2.8.1.10	699182	687818	710920	647661	-0.0857647	0.115163	0.298813	thiazole synthase
3.1.27.3	26456.6	31057.7	36474.7	38677	0.332772	0.11519	0.298813	ribonuclease T1
2.4.1.230	81357.3	60844.7	70816.1	35803.3	-0.48521	0.11623	0.299477	kojibiose phosphorylase
3.4.21.26	395593	394361	462678	422666	0.108535	0.116242	0.299477	prolyl oligopeptidase
1.11.2.4	2061.74	1563.34	2509.24	2854.96	0.517923	0.116367	0.299477	fatty-acid peroxygenase
1.1.1.310	34475	38034.6	29369.2	30943.9	-0.318457	0.116935	0.299477	(S)-sulfolactate dehydrogenase
1.14.16.1	99729.9	97052.9	122511	113793	0.208787	0.116403	0.299477	phenylalanine 4-monooxygenase
3.1.3.18	754369	777954	894300	804034	0.0917164	0.116555	0.299477	phosphoglycolate phosphatase
3.4.24.75	6742.32	6035.69	7968.85	9719.02	0.422289	0.116944	0.299477	lysostaphin
1.1.1.301	28297.6	29020.5	35513	38458.5	0.316631	0.116864	0.299477	D-arabitol-phosphate dehydrogenase
1.13.11.6	285560	316640	287603	274578	-0.154807	0.117497	0.30044	3-hydroxyanthranilate 3,4-dioxygenase
3.1.2.6	951202	918708	942770	891311	-0.0825927	0.117852	0.300623	hydroxyacylglutathione hydrolase
5.4.3.3	58433.4	57098.5	56396	41224.1	-0.305114	0.117923	0.300623	beta-lysine 5,6-aminomutase
6.5.1.3	4222.18	4363.9	6957.41	5086.91	0.425723	0.118642	0.302004	RNA ligase (ATP)
1.18.6.1	2947.55	1975.36	5571.42	2577.56	0.656038	0.11899	0.302435	nitrogenase
3.4.21.19	18313	27273.4	28800.7	35316.9	0.441133	0.11958	0.302928	glutamyl endopeptidase
3.4.17.18	13777.6	17711.2	18242.2	26642	0.466436	0.119897	0.302928	carboxypeptidase T
1.1.1.290	2519.32	3024.22	4125.42	3775.02	0.453693	0.119504	0.302928	4-phosphoerythronate dehydrogenase
2.1.1.200	270231	267967	272939	233631	-0.145116	0.119892	0.302928	tRNA (cytidine32/uridine32-2'-O)-methyltransferase
5.1.1.9	301.759	424.141	230.031	243.138	-0.672651	0.12027	0.303417	arginine racemase
2.1.1.264	55459.4	60805.1	77994.3	67372.4	0.263933	0.120758	0.304197	23S rRNA (guanine2069-N7)-methyltransferase
1.13.12.3	5435.83	7835.31	9964.99	8845.43	0.443312	0.122769	0.308806	tryptophan 2-monooxygenase
3.1.3.5	974376	1.01707e+06	1.09892e+06	1.13361e+06	0.111992	0.12385	0.310604	5'-nucleotidase
5.1.3.14	361482	420243	456060	448632	0.155612	0.123723	0.310604	UDP-N-acetylglucosamine 2-epimerase (non-hydrolysing)
3.6.3.12	1.82184e+06	1.8792e+06	1.89359e+06	1.73935e+06	-0.0828688	0.124096	0.310762	K+-transporting ATPase
2.7.1.119	18264.3	20096.1	25141.1	24840.2	0.327221	0.12469	0.311789	hygromycin-B 7''-O-kinase
3.5.99.2	146725	176043	148744	140498	-0.214805	0.125538	0.313448	aminopyrimidine aminohydrolase
1.4.1.1	1.13418e+06	1.15327e+06	1.13597e+06	1.10109e+06	-0.0865573	0.125819	0.313689	alanine dehydrogenase
6.5.1.4	69211.8	78525.7	90327	92320.6	0.252172	0.126369	0.314596	RNA 3'-terminal-phosphate cyclase (ATP)
4.99.1.7	5902	5889.34	9909.13	6624.2	0.422939	0.127414	0.316676	phenylacetaldoxime dehydratase
3.6.1.41	158961	172768	197283	192226	0.176807	0.127577	0.316676	bis(5'-nucleosyl)-tetraphosphatase (symmetrical)
3.6.1.26	17042.3	12249.1	14121.8	4808.98	-0.708565	0.129082	0.316708	CDP-diacylglycerol diphosphatase
5.3.1.27	8889.79	6840.16	10303.1	11154.1	0.399051	0.128977	0.316708	6-phospho-3-hexuloisomerase
1.13.-.-	438180	392952	480902	453458	0.114788	0.128802	0.316708	Acting on single donors with incorporation of molecular oxygen (oxygenases) The oxygen incorporated need not be derived from O(2)
2.1.1.172	25301.4	23470.9	32564.9	29884.2	0.301443	0.128624	0.316708	16S rRNA (guanine1207-N2)-methyltransferase
5.4.4.1	47506.8	64184.2	52946.8	37841.2	-0.364431	0.128854	0.316708	(hydroxyamino)benzene mutase
3.1.1.72	57431.7	53857.9	73527.6	64330.5	0.252224	0.128864	0.316708	acetylxylan esterase
4.1.1.49	390451	349582	365005	339618	-0.125217	0.128727	0.316708	phosphoenolpyruvate carboxykinase (ATP)
1.13.11.5	157808	136853	147330	117167	-0.21447	0.128586	0.316708	homogentisate 1,2-dioxygenase
4.4.1.19	177028	158352	169890	134158	-0.200631	0.129944	0.317906	phosphosulfolactate synthase
1.1.99.32	150877	167394	158062	130599	-0.200598	0.129945	0.317906	L-sorbose 1-dehydrogenase
3.1.3.77	58130.4	81644.3	88056	93884.4	0.325894	0.131796	0.321809	acireductone synthase
1.1.1.347	5737.97	4129.7	4268.05	3226.77	-0.45529	0.131919	0.321809	geraniol dehydrogenase (NAD+)
4.1.1.11	109907	112484	133044	131445	0.196181	0.133595	0.322571	aspartate 1-decarboxylase
2.6.1.21	238945	237122	237680	210908	-0.142496	0.134344	0.322571	D-amino-acid transaminase
2.7.8.28	283930	263800	263261	253972	-0.136419	0.134151	0.322571	2-phospho-L-lactate transferase
2.4.1.276	158982	160227	166853	112256	-0.258324	0.132675	0.322571	zeaxanthin glucosyltransferase
4.2.1.115	67969.9	75278.7	94562.8	81650.6	0.240352	0.134512	0.322571	UDP-N-acetylglucosamine 4,6-dehydratase (configuration-inverting)
6.3.2.6	691672	687120	699684	653702	-0.082095	0.133645	0.322571	phosphoribosylaminoimidazolesuccinocarboxamide synthase
1.14.11.36	36989.2	37796.3	34867.8	28713.5	-0.29325	0.132501	0.322571	pentalenolactone F synthase
3.1.11.5	85500	75581.7	100701	94510.4	0.223116	0.134219	0.322571	exodeoxyribonuclease V
6.3.1.13	78593.2	50798.2	59105.6	44929.7	-0.372095	0.133104	0.322571	L-cysteine:1D-myo-inositol 2-amino-2-deoxy-alpha-D-glucopyranoside ligase
3.2.1.141	422912	425795	437085	381082	-0.110221	0.133247	0.322571	4-alpha-D-{(1->4)-alpha-D-glucano}trehalose trehalohydrolase
3.5.1.25	471606	422488	459338	395920	-0.12073	0.134149	0.322571	N-acetylglucosamine-6-phosphate deacetylase
3.4.21.-	4.75494e+06	4.86971e+06	5.38078e+06	5.19375e+06	0.0811913	0.134411	0.322571	Serine endopeptidases
3.6.1.11	319361	314295	349566	378756	0.149919	0.135097	0.323519	exopolyphosphatase
3.5.99.8	39330.7	54996	42294.1	34956.4	-0.349823	0.136066	0.325379	5-nitroanthranilic acid aminohydrolase
1.14.13.128	6017.76	4277.4	7865.48	6473.09	0.421897	0.136878	0.32686	7-methylxanthine demethylase
1.4.1.18	156716	133483	178919	163485	0.184092	0.138981	0.328633	lysine 6-dehydrogenase
2.4.1.12	153449	134120	148173	104384	-0.249438	0.138889	0.328633	cellulose synthase (UDP-forming)
4.2.1.41	78813.7	77361.8	94613.5	94124.9	0.219851	0.138269	0.328633	5-dehydro-4-deoxyglucarate dehydratase
3.6.3.34	32324.4	31832	38881.3	42592.6	0.2941	0.138602	0.328633	iron-chelate-transporting ATPase
1.1.99.33	13837.4	12832.2	17655.9	17072.8	0.327286	0.138525	0.328633	formate dehydrogenase (acceptor)
2.7.9.2	66429	64405.3	80297.6	79238.3	0.232651	0.139555	0.328633	pyruvate, water dikinase
3.1.26.-	225763	228873	254453	272368	0.161039	0.139465	0.328633	Endoribonucleases producing 5'-phosphomonoesters
1.3.7.8	67335.4	58224.8	81055.9	73497.2	0.24481	0.137971	0.328633	benzoyl-CoA reductase
2.3.1.18	15581.5	13227.4	18866.9	18742.9	0.332438	0.140436	0.329294	galactoside O-acetyltransferase
3.4.13.18	11813.9	7184.97	12793.2	13976.3	0.447995	0.140708	0.329294	cytosol nonspecific dipeptidase
3.5.4.4	167296	149449	177662	199470	0.20264	0.140872	0.329294	adenosine deaminase
1.4.1.9	88445.4	89061.7	103265	111480	0.223486	0.141	0.329294	leucine dehydrogenase
5.4.3.2	324738	314698	318137	293744	-0.118933	0.140787	0.329294	lysine 2,3-aminomutase
3.1.3.87	88497.2	92185.6	109478	107337	0.208704	0.140915	0.329294	2-hydroxy-3-keto-5-methylthiopentenyl-1-phosphate phosphatase
2.1.1.67	35263.9	43977	48529.4	53818.3	0.316805	0.141514	0.329587	thiopurine S-methyltransferase
3.1.5.1	379.699	423.313	891.837	446.504	0.66441	0.141375	0.329587	dGTPase
2.3.1.46	60814.1	49289.3	56290.6	28329.1	-0.45032	0.142173	0.330217	homoserine O-succinyltransferase
3.1.2.-	3.13418e+06	3.07677e+06	3.23647e+06	2.90234e+06	-0.0731848	0.142084	0.330217	Thiolester hydrolases
3.1.3.48	517908	492643	596928	526038	0.0956195	0.142605	0.330768	protein-tyrosine-phosphatase
1.1.1.140	7395.1	8821.43	11156.6	10561.5	0.364999	0.143328	0.331515	sorbitol-6-phosphate 2-dehydrogenase
1.1.1.244	101899	95187.5	117007	118213	0.202687	0.144294	0.331515	methanol dehydrogenase
2.7.4.13	1561.29	1013.06	2007.75	1832.99	0.525106	0.143882	0.331515	(deoxy)nucleoside-phosphate kinase
2.7.2.1	682667	656207	714424	573491	-0.115277	0.14427	0.331515	acetate kinase
3.2.1.91	93900.2	74056.8	98928.8	109517	0.263147	0.143417	0.331515	cellulose 1,4-beta-cellobiosidase (non-reducing end)
4.1.1.3	127869	119031	123781	98936	-0.207851	0.143925	0.331515	oxaloacetate decarboxylase
4.1.2.4	304017	282700	334547	330458	0.127599	0.144506	0.331554	deoxyribose-phosphate aldolase
1.3.7.9	1.26663e+06	1.35266e+06	1.25437e+06	1.27233e+06	-0.105471	0.145538	0.33347	4-hydroxybenzoyl-CoA reductase
2.1.1.44	440963	459251	456736	413926	-0.104696	0.14666	0.333647	L-histidine Nalpha-methyltransferase
3.1.30.-	55672.8	68416.3	83769.8	71996.2	0.268525	0.146794	0.333647	Endoribonucleases active with either ribo- or deoxyribonucleic acids and producing 5'-phosphomonoesters
1.11.1.9	197583	195203	227224	224400	0.147745	0.146364	0.333647	glutathione peroxidase
5.4.99.20	31058.3	36361.8	40983.9	45464.5	0.306861	0.145985	0.333647	23S rRNA pseudouridine2457 synthase
3.2.1.14	169012	156365	191952	185360	0.159942	0.146605	0.333647	chitinase
3.4.14.-	59733.8	52789.5	53444.3	44044.9	-0.264726	0.14637	0.333647	Dipeptidyl-peptidases and tripeptidyl-peptidases
4.4.1.11	598294	531685	591772	489033	-0.12198	0.147913	0.3344	methionine gamma-lyase
2.4.1.248	728.897	1207.71	2136.51	1094.57	0.662496	0.14788	0.3344	cycloisomaltooligosaccharide glucanotransferase
1.14.11.34	40824.7	37255	51924.6	45586.3	0.264311	0.147527	0.3344	2-oxoglutarate/L-arginine monooxygenase/decarboxylase (succinate-forming)
1.13.12.19	40824.7	37255	51924.6	45586.3	0.264311	0.147527	0.3344	2-oxoglutarate dioxygenase (ethylene-forming)
1.14.99.3	190093	195840	192255	168091	-0.156437	0.148544	0.334423	heme oxygenase (biliverdin-producing)
4.3.3.7	1.60597e+06	1.5661e+06	1.65035e+06	1.48457e+06	-0.0731762	0.148711	0.334423	4-hydroxy-tetrahydrodipicolinate synthase
1.97.1.-	67876.8	69228.2	81309.5	86046	0.23569	0.148371	0.334423	Other oxidoreductases
1.1.1.281	193436	203067	225780	234206	0.161499	0.148243	0.334423	GDP-4-dehydro-6-deoxy-D-mannose reductase
2.7.7.33	475154	481782	556936	505268	0.0942878	0.149207	0.335095	glucose-1-phosphate cytidylyltransferase
4.4.1.1	100104	116209	134508	125613	0.209438	0.149646	0.335636	cystathionine gamma-lyase
5.3.1.14	30313.3	25440.1	36600.2	34152.7	0.289901	0.150241	0.336527	L-rhamnose isomerase
4.1.2.44	300128	297849	288634	280970	-0.124214	0.150717	0.336705	benzoyl-CoA-dihydrodiol lyase
3.4.21.53	1.24021e+06	1.33419e+06	1.25093e+06	1.2419e+06	-0.100675	0.150659	0.336705	endopeptidase La
6.3.3.2	2959.12	2508.89	3715.1	3846.51	0.416752	0.151007	0.336908	5-formyltetrahydrofolate cyclo-ligase
5.5.1.15	1695.92	1907.57	3081.48	2145.34	0.471493	0.151899	0.337597	terpentedienyl-diphosphate synthase
3.4.24.32	265.788	327.704	313.851	726.687	0.776179	0.151912	0.337597	beta-lytic metalloendopeptidase
5.4.3.8	1.22118e+06	1.25841e+06	1.38345e+06	1.34552e+06	0.0838218	0.151907	0.337597	glutamate-1-semialdehyde 2,1-aminomutase
1.8.1.9	1.66307e+06	1.55304e+06	1.68413e+06	1.47897e+06	-0.0804717	0.153745	0.341223	thioredoxin-disulfide reductase
3.5.3.1	307817	328942	354563	375031	0.143989	0.154112	0.341591	arginase
1.13.12.16	849387	785434	872552	699922	-0.115075	0.154669	0.342378	nitronate monooxygenase
2.1.1.107	735683	673786	716238	663924	-0.0850969	0.15557	0.343478	uroporphyrinogen-III C-methyltransferase
1.14.13.-	2.34792e+06	2.24917e+06	2.42417e+06	2.10498e+06	-0.0785143	0.155481	0.343478	With NADH or NADPH as one donor, and incorporation of one atom of oxygen
4.2.1.42	162709	166572	197139	183363	0.152933	0.156189	0.344398	galactarate dehydratase
6.2.1.17	15123	15671.4	17737.7	23139	0.362456	0.156628	0.344918	propionate---CoA ligase
3.4.21.100	442440	326835	407055	157010	-0.523931	0.157046	0.345389	sedolisin
1.7.1.4	201099	196317	235446	218779	0.13749	0.159433	0.346218	nitrite reductase [NAD(P)H]
1.3.99.28	37924.6	37387.6	50306.8	43418.3	0.258079	0.158294	0.346218	phytoene desaturase (neurosporene-forming)
4.3.1.19	1.38993e+06	1.2956e+06	1.35662e+06	1.28767e+06	-0.0765795	0.159462	0.346218	threonine ammonia-lyase
1.5.1.40	247700	252252	256602	215423	-0.14145	0.157876	0.346218	8-hydroxy-5-deazaflavin:NADPH oxidoreductase
6.4.1.1	421919	415175	420542	392580	-0.0971224	0.159256	0.346218	pyruvate carboxylase
4.1.1.87	3559.16	5298.55	6357.34	6059.58	0.429115	0.15878	0.346218	malonyl-S-ACP decarboxylase
1.2.1.73	1399.86	937.36	802.071	866.19	-0.534334	0.159159	0.346218	sulfoacetaldehyde dehydrogenase
4.7.1.1	110133	119521	106178	101970	-0.197097	0.158138	0.346218	alpha-D-ribose 1-methylphosphonate 5-phosphate C-P-lyase
1.3.3.3	268181	273258	273913	241376	-0.128567	0.158416	0.346218	coproporphyrinogen oxidase
1.5.3.-	416014	336846	372179	332629	-0.149911	0.15873	0.346218	With oxygen as acceptor
4.2.1.55	628521	661610	647164	612251	-0.0901725	0.160062	0.347077	3-hydroxybutyryl-CoA dehydratase
5.4.99.26	16717.5	17649.6	20859.4	23523.2	0.318511	0.160758	0.348141	tRNA pseudouridine65 synthase
1.14.15.1	9129.42	11046.3	14976.8	11909.2	0.352742	0.16133	0.348511	camphor 5-monooxygenase
4.2.1.1	1.07979e+06	991309	1.08386e+06	945263	-0.0860835	0.161339	0.348511	carbonate dehydratase
1.3.1.-	1.55142e+06	1.54607e+06	1.59858e+06	1.46813e+06	-0.0701949	0.163249	0.352189	With NAD(+) or NADP(+) as acceptor
1.1.-.-	1.65233e+06	1.56768e+06	1.68675e+06	1.49322e+06	-0.0744471	0.164547	0.354539	Acting on the CH-OH group of donors
1.1.1.305	42533.1	50245.5	56719.9	59379	0.269982	0.165546	0.355338	UDP-glucuronic acid dehydrogenase (UDP-4-keto-hexauronic acid decarboxylating)
3.5.99.5	51293.9	42526.9	47660.7	29571.1	-0.34589	0.165515	0.355338	2-aminomuconate deaminase
2.1.2.13	42533.1	50245.5	56719.9	59379	0.269982	0.165546	0.355338	UDP-4-amino-4-deoxy-L-arabinose formyltransferase
3.2.1.131	63711.3	62822.8	78031.6	74897.5	0.218907	0.166244	0.355935	xylan alpha-1,2-glucuronosidase
4.2.1.54	2406.06	1018.58	2060.3	3671.56	0.712447	0.166772	0.355955	lactoyl-CoA dehydratase
5.4.99.28	34850.9	32979.6	45858.3	38728.2	0.260756	0.167206	0.355955	tRNA pseudouridine32 synthase
5.4.99.29	34850.9	32979.6	45858.3	38728.2	0.260756	0.167206	0.355955	23S rRNA pseudouridine746 synthase
4.1.2.14	240409	226912	272684	256876	0.125796	0.167301	0.355955	2-dehydro-3-deoxy-phosphogluconate aldolase
1.3.1.1	107635	126070	140460	138800	0.201831	0.166665	0.355955	dihydropyrimidine dehydrogenase (NAD+)
4.1.3.16	239580	225883	271949	255511	0.125746	0.16836	0.35776	4-hydroxy-2-oxoglutarate aldolase
2.3.1.111	65507.1	71586.1	92431.4	75200	0.230109	0.16938	0.358774	mycocerosate synthase
3.6.1.13	972433	994617	1.12154e+06	1.03191e+06	0.0746595	0.169606	0.358774	ADP-ribose diphosphatase
2.3.3.15	158121	142488	142854	135243	-0.166341	0.169683	0.358774	sulfoacetaldehyde acetyltransferase
2.3.1.180	907900	909864	1.03344e+06	953138	0.0724114	0.169379	0.358774	beta-ketoacyl-[acyl-carrier-protein] synthase III
1.1.1.309	562.57	770.789	974.237	1012.72	0.519801	0.17067	0.359808	phosphonoacetaldehyde reductase (NADH)
6.3.3.4	181.12	301.042	347.785	432.772	0.644497	0.170572	0.359808	(carboxyethyl)arginine beta-lactam-synthase
3.5.1.112	11018.4	9105	14510.1	11879.5	0.333719	0.170807	0.359808	2'-N-acetylparomamine deacetylase
2.8.3.12	49958.8	50581.1	45530.9	42817.7	-0.241725	0.171775	0.361257	glutaconate CoA-transferase
2.6.1.2	205657	229494	248292	255582	0.15804	0.171921	0.361257	alanine transaminase
2.1.1.37	283614	239676	303885	295415	0.142938	0.172898	0.362861	DNA (cytosine-5-)-methyltransferase
2.1.1.255	21372.9	23888.5	19286.7	19050.4	-0.294261	0.173865	0.363792	geranyl diphosphate 2-C-methyltransferase
1.4.-.-	11565.6	9399.38	8817.49	8413.81	-0.3359	0.173984	0.363792	Acting on the CH-NH(2) group of donors
1.1.1.79	214513	210846	209860	192807	-0.134743	0.173567	0.363792	glyoxylate reductase (NADP+)
1.14.15.3	29733.3	27185.4	34683.4	36499.2	0.271473	0.175287	0.365616	alkane 1-monooxygenase
3.6.1.8	321125	308960	319232	287200	-0.111263	0.175595	0.365809	ATP diphosphatase
2.6.1.16	1.04608e+06	1.01429e+06	1.06603e+06	974805	-0.0694136	0.176038	0.365833	glutamine---fructose-6-phosphate transaminase (isomerizing)
5.5.1.-	21222.8	20830.5	27612.1	25281.7	0.275125	0.175981	0.365833	Intramolecular lyases
1.13.11.1	131157	129208	125167	115566	-0.16863	0.176938	0.367254	catechol 1,2-dioxygenase
6.2.1.32	23547.4	21451.4	19532.9	18878.5	-0.281849	0.180616	0.374431	anthranilate---CoA ligase
3.2.1.49	41489	56008.2	58696.4	66148.9	0.304145	0.181162	0.374647	alpha-N-acetylgalactosaminidase
3.4.24.70	115085	120660	138094	138198	0.175196	0.180993	0.374647	oligopeptidase A
2.4.1.287	45032.3	31965.5	37800.7	25277.1	-0.349483	0.181608	0.375112	rhamnopyranosyl-N-acetylglucosaminyl-diphospho-decaprenol beta-1,3/1,4-galactofuranosyltransferase
1.4.3.10	27304.5	28902	36747.1	33220.3	0.259198	0.184276	0.379198	putrescine oxidase
2.1.1.213	3765.91	3172.41	2826.87	2687.72	-0.384492	0.184163	0.379198	tRNA (guanine10-N2)-dimethyltransferase
4.2.1.33	1.8689e+06	1.82929e+06	1.87313e+06	1.79177e+06	-0.0675052	0.186229	0.379198	3-isopropylmalate dehydratase
2.8.1.4	97369.2	106604	112072	135924	0.233248	0.186265	0.379198	tRNA sulfurtransferase
1.1.1.261	70644.4	56607.8	79473.4	75742.2	0.233741	0.185376	0.379198	sn-glycerol-1-phosphate dehydrogenase
5.3.1.23	513535	500575	506376	485673	-0.0860817	0.185744	0.379198	S-methyl-5-thioribose-1-phosphate isomerase
2.7.10.-	227900	249800	300863	249299	0.144218	0.185846	0.379198	Protein-tyrosine kinases
6.3.2.28	2222.68	1672.59	3138.8	2349.24	0.435117	0.185675	0.379198	L-amino-acid alpha-ligase
4.2.1.91	163045	155237	158559	139369	-0.151976	0.184786	0.379198	arogenate dehydratase
3.1.3.45	186749	225097	244739	237246	0.170999	0.185476	0.379198	3-deoxy-manno-octulosonate-8-phosphatase
3.1.11.2	857744	844406	860809	821440	-0.071548	0.186708	0.379644	exodeoxyribonuclease III
3.5.2.6	1.96801e+06	1.93899e+06	2.19364e+06	2.05317e+06	0.0651773	0.18716	0.380107	beta-lactamase
1.4.3.5	1.02798e+06	968606	1.02814e+06	947932	-0.070087	0.187885	0.380215	pyridoxal 5'-phosphate synthase
2.1.4.2	34099.1	33797.3	40422.9	43651.4	0.257214	0.187571	0.380215	scyllo-inosamine-4-phosphate amidinotransferase
2.1.-.-	36479.5	31585	46993.7	37940.2	0.261203	0.187741	0.380215	Transferring one-carbon groups
4.1.2.13	954493	964841	1.01784e+06	869992	-0.0818256	0.188149	0.380296	fructose-bisphosphate aldolase
1.4.3.2	205106	213484	246771	229242	0.129632	0.188925	0.38141	L-amino-acid oxidase
5.4.99.27	105500	106492	127820	120160	0.170988	0.190372	0.383486	tRNA pseudouridine13 synthase
3.4.21.105	343332	343870	399327	365471	0.0984223	0.190408	0.383486	rhomboid protease
1.17.1.4	2.74477e+06	2.8653e+06	2.82424e+06	2.70763e+06	-0.0752119	0.19063	0.383486	xanthine dehydrogenase
2.3.1.81	46312.7	51654.9	58583.5	61657.5	0.242663	0.191689	0.385159	aminoglycoside N3'-acetyltransferase
3.5.1.88	750355	769033	840275	828614	0.0814043	0.192527	0.386386	peptide deformylase
1.4.9.2	33444.7	40677.6	47745.5	44722.4	0.262077	0.19324	0.387358	aralkylamine dehydrogenase (azurin)
3.5.2.10	293463	316559	353100	334090	0.116231	0.194035	0.388494	creatininase
1.2.1.10	111748	110097	125888	134747	0.181163	0.195738	0.390522	acetaldehyde dehydrogenase (acetylating)
3.6.3.33	62744.7	59013.4	71501.1	75301.2	0.21848	0.195724	0.390522	vitamin B12-transporting ATPase
2.4.1.288	24570.1	17814.3	20769.3	13785.7	-0.356801	0.196292	0.391167	galactofuranosylgalactofuranosylrhamnosyl-N-acetylglucosaminyl-diphospho-decaprenol beta-1,5/1,6-galactofuranosyltransferase
2.3.1.28	101565	108388	99305.3	93098.5	-0.181714	0.198295	0.394496	chloramphenicol O-acetyltransferase
4.1.1.32	245425	271024	301782	284805	0.127826	0.198427	0.394496	phosphoenolpyruvate carboxykinase (GTP)
2.7.1.27	5749.4	5397.65	7403.02	7039.65	0.319434	0.199633	0.396428	erythritol kinase
2.7.7.39	4453.43	4915.34	5363.76	7237.22	0.381905	0.200436	0.396785	glycerol-3-phosphate cytidylyltransferase
3.5.2.19	61240.6	57634	56160.4	50131.5	-0.217505	0.200513	0.396785	streptothricin hydrolase
1.1.1.9	7264.53	6502.91	9136.23	8619.8	0.312898	0.200337	0.396785	D-xylulose reductase
2.8.3.17	302312	324235	355860	348878	0.11511	0.201834	0.398934	cinnamoyl-CoA:phenyllactate CoA-transferase
5.3.3.17	106202	89303.7	93522.5	83891.3	-0.195081	0.202804	0.400333	trans-2,3-dihydro-3-hydroxyanthranilate isomerase
2.7.4.14	4414.27	5089.07	5715.66	6897.2	0.359146	0.203014	0.400333	UMP/CMP kinase
2.1.1.177	269326	271334	285355	227994	-0.134615	0.203308	0.400448	23S rRNA (pseudouridine1915-N3)-methyltransferase
3.11.1.2	232734	255245	240005	223356	-0.130915	0.204414	0.401005	phosphonoacetate hydrolase
1.3.99.34	366889	330009	404250	372963	0.102602	0.204143	0.401005	2,3-bis-O-geranylgeranyl-sn-glycerol 1-phosphate reductase (donor)
2.1.1.166	217517	220626	220167	197375	-0.126102	0.204125	0.401005	23S rRNA (uridine2552-2'-O)-methyltransferase
3.7.1.20	151491	137514	138644	130810	-0.155257	0.204535	0.401005	3-fumarylpyruvate hydrolase
4.4.1.24	115205	110766	123593	144713	0.199184	0.205862	0.402676	(2R)-sulfolactate sulfo-lyase
4.1.1.25	65487.2	66329.6	80515.9	76579.1	0.198178	0.205659	0.402676	tyrosine decarboxylase
2.4.1.44	934.555	958.215	783.147	665.544	-0.443694	0.206251	0.402973	lipopolysaccharide 3-alpha-galactosyltransferase
6.3.1.2	1.80908e+06	1.72728e+06	1.80963e+06	1.70459e+06	-0.0637461	0.207675	0.405288	glutamate---ammonia ligase
1.2.1.9	7667.87	6785.09	8800.7	9882.95	0.32139	0.208626	0.406678	glyceraldehyde-3-phosphate dehydrogenase (NADP+)
3.5.1.1	293590	335683	352259	366865	0.139171	0.210549	0.409094	asparaginase
1.3.1.32	207948	175253	184422	173883	-0.150492	0.210589	0.409094	maleylacetate reductase
3.6.3.2	169971	147608	174954	91049.4	-0.325943	0.211647	0.410211	Mg2+-importing ATPase
1.1.1.69	495248	452679	485484	440989	-0.0883708	0.21157	0.410211	gluconate 5-dehydrogenase
3.5.1.77	197361	199886	199188	178527	-0.129353	0.212755	0.411888	N-carbamoyl-D-amino-acid hydrolase
3.2.1.82	33726	32126.1	40539.7	39850.6	0.234356	0.213348	0.412566	exo-poly-alpha-galacturonosidase
4.2.1.80	170729	157355	194950	179420	0.135357	0.214619	0.414552	2-oxopent-4-enoate hydratase
3.1.3.71	159145	151098	182221	171908	0.136283	0.215152	0.415109	2-phosphosulfolactate phosphatase
5.1.3.13	538188	538323	631990	551883	0.0799031	0.216308	0.416545	dTDP-4-dehydrorhamnose 3,5-epimerase
1.13.11.3	525580	506867	565171	573628	0.088802	0.216387	0.416545	protocatechuate 3,4-dioxygenase
2.1.1.271	24431.9	18106.9	20438.2	15258.6	-0.312074	0.217166	0.416627	cobalt-precorrin-4 methyltransferase
2.1.1.11	30313.1	25750	35048.9	34040.7	0.248624	0.217029	0.416627	magnesium protoporphyrin IX methyltransferase
4.2.-.-	447142	445567	458591	417217	-0.0836231	0.216763	0.416627	Carbon-oxygen lyases
1.12.5.1	742.732	327.81	1866.21	332.031	0.950128	0.218137	0.418017	hydrogen:quinone oxidoreductase
1.17.2.2	4748.41	4917.45	6913.54	5634.63	0.317232	0.220217	0.420579	lupanine 17-hydroxylase (cytochrome c)
1.2.99.7	49393.9	50370.7	63702.7	56390.9	0.21053	0.219966	0.420579	aldehyde dehydrogenase (FAD-independent)
1.7.1.15	47897.2	43461.1	47990.7	67764.9	0.298657	0.220108	0.420579	nitrite reductase (NADH)
3.6.1.31	388374	376538	390510	357025	-0.0888227	0.221618	0.422366	phosphoribosyl-ATP diphosphatase
2.7.7.42	371684	377572	388021	341936	-0.0947703	0.221898	0.422366	[glutamate---ammonia-ligase] adenylyltransferase
3.4.21.83	336397	334656	344872	307282	-0.0978416	0.221779	0.422366	oligopeptidase B
2.7.8.33	321086	324742	381657	337373	0.0979053	0.223451	0.424845	UDP-N-acetylglucosamine---undecaprenyl-phosphate N-acetylglucosaminephosphotransferase
1.12.7.2	142787	136164	141755	119210	-0.15406	0.224176	0.425294	ferredoxin hydrogenase
2.1.1.171	300343	255367	280826	248229	-0.126409	0.224689	0.425294	16S rRNA (guanine966-N2)-methyltransferase
1.1.1.157	840753	852201	930029	919910	0.0741242	0.224614	0.425294	3-hydroxybutyryl-CoA dehydrogenase
2.1.2.11	669663	646395	668881	635081	-0.0678754	0.224476	0.425294	3-methyl-2-oxobutanoate hydroxymethyltransferase
5.1.1.4	20470.2	25605.9	26244.9	32745.8	0.307433	0.224995	0.425399	proline racemase
4.2.1.-	929484	909210	947150	881784	-0.0629085	0.226394	0.426649	Hydro-lyases
2.7.7.9	652931	666849	696396	607078	-0.0754137	0.226005	0.426649	UTP---glucose-1-phosphate uridylyltransferase
3.8.1.7	4878.6	3985.49	4001.89	3278.41	-0.341308	0.22641	0.426649	4-chlorobenzoyl-CoA dehalogenase
1.2.7.6	449.822	613.394	320.234	443.391	-0.525376	0.227662	0.428057	glyceraldehyde-3-phosphate dehydrogenase (ferredoxin)
1.3.5.2	283343	286608	295197	254650	-0.1095	0.227588	0.428057	dihydroorotate dehydrogenase (quinone)
2.6.1.11	1.0263e+06	937901	1.02988e+06	911478	-0.0729595	0.228362	0.428899	acetylornithine transaminase
3.6.3.25	525797	495622	558816	566982	0.0879182	0.229977	0.429352	sulfate-transporting ATPase
1.5.1.24	7597.86	3479.8	4954.39	3183.83	-0.504299	0.229478	0.429352	N5-(carboxyethyl)ornithine synthase
3.5.3.12	219880	248505	284497	249514	0.130991	0.229109	0.429352	agmatine deiminase
3.1.1.27	87627.8	72069.6	72749.5	71107.4	-0.203052	0.230121	0.429352	4-pyridoxolactonase
1.1.1.292	415067	404621	471146	430413	0.0816074	0.229033	0.429352	1,5-anhydro-D-fructose reductase (1,5-anhydro-D-mannitol-forming)
1.4.1.11	42609.6	35330.9	39506	28007.9	-0.268698	0.230476	0.429544	L-erythro-3,5-diaminohexanoate dehydrogenase
1.2.1.5	187520	176426	209483	202258	0.124159	0.235273	0.431381	aldehyde dehydrogenase [NAD(P)+]
1.14.15.13	7550.21	6719.63	8737	9440.77	0.299023	0.234605	0.431381	pulcherriminic acid synthase
2.1.1.247	22412.9	32711.2	33693.5	37236.9	0.309941	0.234632	0.431381	[methyl-Co(III) methylamine-specific corrinoid protein]:coenzyme M methyltransferase
3.5.1.54	142027	116455	131597	105218	-0.184334	0.233841	0.431381	allophanate hydrolase
1.2.1.58	70080.1	79661.3	94358	83655.3	0.191589	0.235125	0.431381	phenylglyoxylate dehydrogenase (acylating)
4.2.1.6	925005	935761	1.02615e+06	1.00045e+06	0.0689551	0.232158	0.431381	galactonate dehydratase
1.3.1.12	228215	203984	250143	237499	0.120238	0.233145	0.431381	prephenate dehydrogenase
4.3.2.3	553277	568734	564705	539914	-0.0774394	0.234155	0.431381	ureidoglycolate lyase
1.1.1.338	37667.3	37470.2	40534.2	53150.5	0.272618	0.232861	0.431381	(2R)-3-sulfolactate dehydrogenase (NADP+)
3.5.3.3	23338.2	31461.2	23802.9	22975.5	-0.285247	0.233507	0.431381	creatinase
1.2.1.86	90250.7	77371.1	97335.3	100468	0.187708	0.233378	0.431381	geranial dehydrogenase
2.1.1.186	13460.6	13867.8	18210.6	15909.2	0.262693	0.235272	0.431381	23S rRNA (cytidine2498-2'-O)-methyltransferase
4.2.1.103	599032	617023	639037	560029	-0.0776987	0.232356	0.431381	cyclohexyl-isocyanide hydratase
3.1.1.84	1.09785e+06	1.15545e+06	1.18724e+06	1.03871e+06	-0.0752557	0.232862	0.431381	cocaine esterase
3.5.3.7	217240	216530	226949	186134	-0.129498	0.235638	0.431408	guanidinobutyrase
3.4.23.43	379979	394042	439250	415347	0.0875784	0.235796	0.431408	prepilin peptidase
3.6.1.54	338213	339225	334337	323852	-0.0959036	0.236423	0.431625	UDP-2,3-diacylglucosamine diphosphatase
3.1.3.12	297750	249885	274855	246369	-0.126295	0.236255	0.431625	trehalose-phosphatase
2.3.1.51	616961	670289	728027	688844	0.0827375	0.237493	0.432183	1-acylglycerol-3-phosphate O-acyltransferase
2.3.1.5	80187.2	77030.7	98550.6	86035.7	0.174629	0.237345	0.432183	arylamine N-acetyltransferase
5.1.3.22	260680	246843	295279	271392	0.103723	0.237365	0.432183	L-ribulose-5-phosphate 3-epimerase
3.2.1.67	3982.9	2291.92	2569.67	2277.87	-0.424356	0.238027	0.432692	galacturan 1,4-alpha-galacturonidase
3.4.22.39	603.687	230.108	478.8	902.974	0.700036	0.238913	0.433839	adenain
2.8.4.2	161260	130005	136124	132817	-0.167262	0.241043	0.437238	arsenate-mycothiol transferase
4.1.1.15	153940	100190	124913	96595.9	-0.255217	0.242136	0.438328	glutamate decarboxylase
3.7.1.7	4294.9	4440.79	5273.47	5988.63	0.316338	0.24216	0.438328	beta-diketone hydrolase
3.5.-.-	2.21572e+06	2.31965e+06	2.52481e+06	2.41359e+06	0.0677562	0.242458	0.438399	Acting on carbon-nitrogen bonds, other than peptide bonds
1.7.2.4	71693.2	55545.3	69321.5	87483.4	0.256848	0.243736	0.439158	nitrous-oxide reductase
3.5.1.86	20250.3	24393.7	25507.9	30706.9	0.282759	0.243655	0.439158	mandelamide amidase
1.7.99.4	866071	694176	744667	745685	-0.117549	0.244214	0.439158	nitrate reductase
1.2.1.76	89180.6	77592.2	95673	100603	0.184254	0.244429	0.439158	succinate-semialdehyde dehydrogenase (acylating)
3.5.2.3	764657	720123	768142	707037	-0.0645846	0.244128	0.439158	dihydroorotase
1.3.1.76	452257	432721	459697	410639	-0.0802859	0.244232	0.439158	precorrin-2 dehydrogenase
5.3.3.8	75009	72055.6	85654.3	87062.6	0.179387	0.245955	0.440905	dodecenoyl-CoA isomerase
2.7.4.16	469163	439196	473592	418715	-0.0820432	0.246181	0.440905	thiamine-phosphate kinase
3.4.24.29	1126.92	2955.09	2853.12	3473.95	0.576683	0.245827	0.440905	aureolysin
2.1.1.80	401879	448262	510167	440989	0.103497	0.248116	0.443902	protein-glutamate O-methyltransferase
3.5.99.4	26493.5	23631.2	24837.8	19003.8	-0.253209	0.249755	0.44454	N-isopropylammelide isopropylaminohydrolase
6.1.1.17	652767	635757	712366	687970	0.0659069	0.248776	0.44454	glutamate---tRNA ligase
4.1.1.77	29300.4	28602.7	27955.2	23365.3	-0.232395	0.249474	0.44454	2-oxo-3-hexenedioate decarboxylase
1.14.14.5	285272	296868	299574	264163	-0.103658	0.250305	0.44454	alkanesulfonate monooxygenase
2.6.1.42	1.16992e+06	1.19837e+06	1.2992e+06	1.2796e+06	0.0688294	0.249981	0.44454	branched-chain-amino-acid transaminase
3.1.1.77	12320.2	12358.4	17080.7	13807.6	0.264408	0.249283	0.44454	acyloxyacyl hydrolase
4.3.1.-	61654.8	75304.9	65554.2	57451.2	-0.213909	0.250156	0.44454	Ammonia-lyases
1.5.1.39	98601.1	98887.2	84321.7	95370	-0.186144	0.250573	0.444551	FMN reductase [NAD(P)H]
5.3.3.6	30471.2	41484.6	41393.7	49378	0.284104	0.251607	0.445772	methylitaconate Delta-isomerase
2.7.7.68	244849	241916	261205	201026	-0.135334	0.251786	0.445772	2-phospho-L-lactate guanylyltransferase
2.7.1.59	24258.9	16928.3	21428.9	12134.3	-0.361481	0.254648	0.447026	N-acetylglucosamine kinase
2.7.11.-	439368	425112	472177	480348	0.0873182	0.254862	0.447026	Protein-serine/threonine kinases
2.7.4.7	419121	412297	424555	393586	-0.0786242	0.253789	0.447026	phosphomethylpyrimidine kinase
3.6.3.8	338612	271337	348773	343582	0.130931	0.254864	0.447026	Ca2+-transporting ATPase
2.7.1.175	101964	80861.3	91838.3	73647.4	-0.201423	0.254597	0.447026	maltokinase
6.2.1.39	499.833	454.594	655.024	674.067	0.424839	0.2531	0.447026	[butirosin acyl-carrier protein]---L-glutamate ligase
2.7.1.49	419121	412297	424555	393586	-0.0786242	0.253789	0.447026	hydroxymethylpyrimidine kinase
3.2.1.165	119031	120706	135490	64182	-0.337847	0.254121	0.447026	exo-1,4-beta-D-glucosaminidase
3.1.1.23	151754	145338	170286	167006	0.129526	0.255713	0.448052	acylglycerol lipase
3.5.4.25	805164	823197	843260	776451	-0.0636125	0.256192	0.448428	GTP cyclohydrolase II
4.2.1.8	189147	187704	219716	204142	0.114174	0.257514	0.450279	mannonate dehydratase
1.1.1.27	238896	214787	234787	199550	-0.119963	0.259695	0.453624	L-lactate dehydrogenase
1.1.1.35	809761	815541	840799	778377	-0.0610918	0.260457	0.454488	3-hydroxyacyl-CoA dehydrogenase
5.-.-.-	170023	172753	167659	159156	-0.123797	0.261918	0.455167	Isomerases
1.14.12.1	148183	149444	154304	126692	-0.142026	0.261392	0.455167	anthranilate 1,2-dioxygenase (deaminating, decarboxylating)
3.1.21.3	211705	274708	299302	267614	0.162132	0.261858	0.455167	type I site-specific deoxyribonuclease
3.4.23.36	419775	413301	480862	432580	0.0766005	0.261519	0.455167	signal peptidase II
3.1.3.23	251226	220314	253971	188740	-0.151688	0.263611	0.45764	sugar-phosphatase
1.3.5.6	25929	23847.1	31354.9	28944.5	0.221769	0.265165	0.459867	9,9'-dicis-zeta-carotene desaturase
5.1.1.1	539387	507792	530110	504105	-0.0722649	0.265729	0.460375	alanine racemase
1.13.11.48	5251.9	3881.58	5889.08	5841.35	0.309847	0.266789	0.461211	3-hydroxy-2-methylquinolin-4-one 2,4-dioxygenase
2.7.8.24	146802	149828	142716	138352	-0.13219	0.268016	0.461211	phosphatidylcholine synthase
1.1.1.271	504942	524163	524135	491242	-0.0749293	0.268113	0.461211	GDP-L-fucose synthase
2.7.1.177	5031.38	6473.36	7233.5	7521.9	0.304623	0.267738	0.461211	L-threonine kinase
2.1.1.189	15473.1	17772.9	19405.1	21888.7	0.261591	0.268027	0.461211	23S rRNA (uracil747-C5)-methyltransferase
2.7.2.15	491.772	347.805	375.675	251.865	-0.480923	0.26664	0.461211	propionate kinase
2.7.-.-	837619	833326	975533	844155	0.0655658	0.267868	0.461211	Transferring phosphorus-containing groups
4.3.1.17	151041	125725	159372	158793	0.149211	0.268663	0.46169	L-serine ammonia-lyase
1.3.7.1	32501.4	30127	43833	32733.2	0.228882	0.270281	0.463531	6-hydroxynicotinate reductase
4.2.3.37	261.761	179.122	314.596	320.796	0.478201	0.27025	0.463531	epi-isozizaene synthase
1.12.98.1	31961.3	25244.3	32108.4	38521.3	0.257942	0.271009	0.464311	coenzyme F420 hydrogenase
4.1.3.30	226162	220919	227965	203829	-0.106562	0.271857	0.465157	methylisocitrate lyase
1.1.1.306	310139	255507	279038	261082	-0.120221	0.272051	0.465157	S-(hydroxymethyl)mycothiol dehydrogenase
2.7.7.76	52944.4	63660.6	71145.2	68225.6	0.20113	0.272495	0.465448	molybdenum cofactor cytidylyltransferase
1.14.13.15	152624	146260	152194	131864	-0.130499	0.272772	0.465453	cholestanetriol 26-monooxygenase
2.3.1.109	25085.3	35676.2	38388.9	37577.8	0.265215	0.274761	0.46555	arginine N-succinyltransferase
2.7.2.4	705996	704067	780304	747771	0.0613829	0.275022	0.46555	aspartate kinase
1.1.99.31	128397	120040	118928	114882	-0.141329	0.274761	0.46555	(S)-mandelate dehydrogenase
4.1.2.49	378674	367928	415934	403550	0.0803821	0.274897	0.46555	L-allo-threonine aldolase
3.1.1.-	3.30104e+06	3.1578e+06	3.40149e+06	3.06348e+06	-0.054612	0.274797	0.46555	Carboxylic ester hydrolases
4.3.2.6	3942.75	4319.4	5735.82	4806.91	0.292528	0.273433	0.46555	gamma-L-glutamyl-butirosin B gamma-glutamyl cyclotransferase
2.1.1.38	462415	483608	538435	498081	0.0758026	0.274862	0.46555	O-demethylpuromycin O-methyltransferase
2.7.1.39	486308	465302	500484	439110	-0.0750615	0.274797	0.46555	homoserine kinase
3.4.25.1	327921	314221	328306	299845	-0.0873787	0.278101	0.470292	proteasome endopeptidase complex
3.1.13.1	526310	520710	550790	486394	-0.0704512	0.278388	0.470309	exoribonuclease II
2.5.1.76	1342.97	1032.15	1449.92	1754.29	0.386107	0.278753	0.470458	cysteate synthase
4.2.1.106	101858	101880	123824	110382	0.144402	0.279256	0.470839	bile-acid 7alpha-dehydratase
2.3.1.183	551898	510776	546720	504508	-0.0706255	0.279929	0.471038	phosphinothricin acetyltransferase
1.1.1.350	25502.1	19901.6	21266	18530.8	-0.245323	0.279828	0.471038	ureidoglycolate dehydrogenase (NAD+)
3.3.2.8	80807.7	81469.1	98084.8	89944.3	0.156573	0.280278	0.471158	limonene-1,2-epoxide hydrolase
2.1.1.144	982940	935676	1.02382e+06	886375	-0.0634137	0.281031	0.471957	trans-aconitate 2-methyltransferase
3.5.1.100	93573.3	99376.9	110607	112288	0.154663	0.283006	0.474804	(R)-amidase
2.7.7.81	26064.1	26846.8	32135.3	31498.5	0.21202	0.284086	0.476145	pseudaminic acid cytidylyltransferase
1.12.-.-	262070	274327	270935	250073	-0.0980593	0.285524	0.478084	Acting on hydrogen as donors
1.7.2.6	49449.9	40653.6	48938.7	28672.4	-0.281987	0.288412	0.479292	hydroxylamine dehydrogenase
2.7.1.25	688925	647006	751533	694968	0.0596527	0.288455	0.479292	adenylyl-sulfate kinase
1.1.3.17	13645.3	11629.5	12895.2	8854.54	-0.279308	0.288786	0.479292	choline oxidase
1.3.99.-	8.10441e+06	7.88109e+06	8.0796e+06	7.88937e+06	-0.0553102	0.28874	0.479292	With other acceptors
2.4.1.7	9404.54	8201.04	10070.5	11947.3	0.275253	0.287447	0.479292	sucrose phosphorylase
1.1.1.57	4790.56	4651.3	6219.97	5610.4	0.269214	0.28946	0.479767	fructuronate reductase
2.6.1.57	3671.26	3516.2	3984.49	5284.68	0.321948	0.289638	0.479767	aromatic-amino-acid transaminase
4.2.3.22	3814.43	5240.21	5935.16	5696.94	0.304195	0.292544	0.481295	germacradienol synthase
4.2.3.75	3814.43	5240.21	5935.16	5696.94	0.304195	0.292544	0.481295	(-)-germacrene D synthase
4.2.1.51	686614	665665	703019	647637	-0.0571859	0.291875	0.481295	prephenate dehydratase
3.4.11.19	66408.3	68180.1	81931.5	74943.9	0.164922	0.291402	0.481295	D-stereospecific aminopeptidase
3.1.13.5	348499	335634	353575	318086	-0.0826154	0.29096	0.481295	ribonuclease D
4.1.99.16	3814.43	5240.21	5935.16	5696.94	0.304195	0.292544	0.481295	geosmin synthase
1.13.11.9	135949	126206	119890	126083	-0.143222	0.29201	0.481295	2,5-dihydroxypyridine 5,6-dioxygenase
4.6.1.13	7032.07	5570.33	6462.4	4106.68	-0.317906	0.294751	0.483595	phosphatidylinositol diacylglycerol-lyase
1.14.12.18	143638	145084	150036	124245	-0.132867	0.294725	0.483595	biphenyl 2,3-dioxygenase
5.1.99.6	577317	553910	594951	529604	-0.0648746	0.295026	0.483595	NAD(P)H-hydrate epimerase
3.5.4.5	236630	237627	269923	256311	0.0951411	0.29537	0.483595	cytidine deaminase
3.2.1.86	156350	111914	129241	115848	-0.183971	0.295651	0.483595	6-phospho-beta-glucosidase
3.2.1.35	559.62	318.367	355.206	303.162	-0.469119	0.295182	0.483595	hyaluronoglucosaminidase
3.2.1.68	7247.97	8870.17	10725	9459.29	0.265836	0.296321	0.483759	isoamylase
2.4.2.4	91621.7	82846	98295.1	103494	0.158845	0.29786	0.485803	thymidine phosphorylase
1.5.1.37	2334.17	2419.86	3222.23	2881.55	0.303735	0.298339	0.486117	FAD reductase (NADH)
4.4.1.23	124000	112324	115096	107852	-0.138437	0.298703	0.486244	2-hydroxypropyl-CoM lyase
2.1.1.265	113474	102069	126441	119964	0.139092	0.299119	0.486455	tellurite methyltransferase
1.8.7.1	193227	182251	211893	208016	0.107947	0.302314	0.486735	assimilatory sulfite reductase (ferredoxin)
4.4.1.15	33926.7	34320.8	42221.5	38877.6	0.193062	0.299682	0.486735	D-cysteine desulfhydrase
1.3.99.32	50635.2	53441	60286.8	62248	0.182618	0.30254	0.486735	glutaryl-CoA dehydrogenase (acceptor)
1.1.1.202	117098	106263	142103	115122	0.145119	0.302797	0.486735	1,3-propanediol dehydrogenase
3.5.1.82	258842	283694	309939	294364	0.0999061	0.302511	0.486735	N-acyl-D-glutamate deacylase
1.14.14.13	28761.2	51757.6	47030.3	57965.5	0.330518	0.303305	0.486735	4-(gamma-L-glutamylamino)butanoyl-[BtrI acyl-carrier protein] monooxygenase
3.1.1.91	113962	122350	121368	101161	-0.145885	0.301886	0.486735	2-oxo-3-(5-oxofuran-2-ylidene)propanoate lactonase
4.3.1.18	329.322	381.488	474.486	503.163	0.407405	0.30104	0.486735	D-serine ammonia-lyase
6.-.-.-	56705.6	56225.4	62313.4	71084.4	0.190721	0.302454	0.486735	Ligases
2.7.1.-	3.25998e+06	3.13053e+06	3.38305e+06	3.02543e+06	-0.0521645	0.301071	0.486735	Phosphotransferases with an alcohol group as acceptor
4.1.1.22	6723.34	8551.39	9247.54	9951.31	0.276576	0.302286	0.486735	histidine decarboxylase
1.14.11.2	16894.8	18752.5	21416.1	21888.4	0.227053	0.301798	0.486735	procollagen-proline dioxygenase
4.1.1.39	99456.5	80063.4	98146.3	61505.9	-0.233871	0.302702	0.486735	ribulose-bisphosphate carboxylase
1.1.1.2	19295	24796.8	31775.3	23264.3	0.255548	0.303294	0.486735	alcohol dehydrogenase (NADP+)
4.2.3.97	506.409	504.85	697.145	665.669	0.376244	0.304139	0.487614	(-)-delta-cadinene synthase
4.1.99.14	7832.42	14617.2	16933	13159.2	0.356943	0.305236	0.48891	spore photoproduct lyase
2.5.1.89	5972.72	8869.43	6888.49	5630.65	-0.308044	0.305976	0.489173	tritrans,polycis-undecaprenyl-diphosphate synthase [geranylgeranyl-diphosphate specific]
2.1.1.251	8291.17	14979.5	14102.6	16767.2	0.354285	0.305816	0.489173	methylated-thiol---coenzyme M methyltransferase
1.14.13.131	52518.1	44417.4	53676.2	30039.9	-0.279639	0.306716	0.489894	dimethyl-sulfide monooxygenase
5.3.3.18	1.39249e+06	1.3824e+06	1.39755e+06	1.37121e+06	-0.0570457	0.307125	0.490087	2-(1,2-epoxy-1,2-dihydrophenyl)acetyl-CoA isomerase
2.1.1.243	2154.25	1756.49	1645.08	1585.1	-0.328314	0.307469	0.490174	2-ketoarginine methyltransferase
2.4.1.283	21269.6	19605.1	24745.7	24358.4	0.211492	0.309181	0.491503	2-deoxystreptamine N-acetyl-D-glucosaminyltransferase
2.1.1.185	242204	219748	236203	211355	-0.101376	0.308959	0.491503	23S rRNA (guanosine2251-2'-O)-methyltransferase
3.6.1.1	1.30539e+06	1.25403e+06	1.43463e+06	1.3214e+06	0.0513962	0.308753	0.491503	inorganic diphosphatase
3.2.1.156	9671.71	5894.24	9505.3	10498.5	0.315539	0.309586	0.491503	oligosaccharide reducing-end xylanase
2.1.1.235	60724.2	54484.3	62705.9	73670.3	0.195485	0.309758	0.491503	dTDP-3-amino-3,6-dideoxy-alpha-D-glucopyranose N,N-dimethyltransferase
2.5.1.68	31562.2	22735.5	29500	16112.6	-0.318845	0.310039	0.491503	(2Z,6E)-farnesyl diphosphate synthase
2.4.2.43	418874	444997	473699	362284	-0.108872	0.3106	0.491932	lipid IVA 4-amino-4-deoxy-L-arabinosyltransferase
4.2.3.3	40535.8	47087.6	54416.2	49685.1	0.191313	0.311262	0.492523	methylglyoxal synthase
2.6.1.101	38246.6	39311.4	48352.2	43284.4	0.183862	0.31322	0.493271	L-glutamine:3-amino-2,3-dideoxy-scyllo-inosose aminotransferase
6.3.2.9	571977	518249	558984	520767	-0.0684748	0.313938	0.493271	UDP-N-acetylmuramoyl-L-alanine---D-glutamate ligase
2.3.1.35	503940	489483	503146	482391	-0.065829	0.314437	0.493271	glutamate N-acetyltransferase
3.4.21.101	55956.8	46256.2	59725.7	19280.5	-0.452768	0.314079	0.493271	xanthomonalisin
2.5.1.19	602128	560929	595480	560981	-0.0626745	0.314131	0.493271	3-phosphoshikimate 1-carboxyvinyltransferase
1.5.5.-	9441.01	6667.47	8492.43	4832.88	-0.33975	0.312674	0.493271	With a quinone or similar compound as acceptor
1.1.1.24	10197.5	6842.71	11016.9	10431.5	0.280301	0.31464	0.493271	quinate dehydrogenase
3.4.19.11	1876.13	1750.82	2113.17	2595.33	0.329297	0.313848	0.493271	gamma-D-glutamyl-meso-diaminopimelate peptidase
6.3.1.-	271421	267008	285391	238868	-0.0967857	0.312784	0.493271	Acid--ammonia (or amine) ligases (amide synthases)
5.3.1.12	116226	112665	139508	120941	0.129157	0.316381	0.495086	glucuronate isomerase
1.4.9.1	4826.93	4692.96	5072.59	2877.18	-0.328919	0.316238	0.495086	methylamine dehydrogenase (amicyanin)
2.1.1.223	105829	90767.5	101871	81453.6	-0.159255	0.318908	0.496294	tRNA1Val (adenine37-N6)-methyltransferase
1.1.1.219	633641	648454	689512	583592	-0.0684883	0.31816	0.496294	dihydrokaempferol 4-reductase
3.1.3.73	154215	141988	153201	129677	-0.123822	0.317564	0.496294	adenosylcobalamin/alpha-ribazole phosphatase
3.2.1.133	19188.8	26197.2	29651.5	26266.6	0.241552	0.318848	0.496294	glucan 1,4-alpha-maltohydrolase
5.5.1.4	256127	232759	235975	236665	-0.101225	0.317744	0.496294	inositol-3-phosphate synthase
1.14.12.21	332520	351184	339482	329614	-0.0858555	0.318782	0.496294	benzoyl-CoA 2,3-dioxygenase
4.2.1.119	859157	905844	880416	869840	-0.0662881	0.320007	0.496878	enoyl-CoA hydratase 2
2.7.2.11	407016	395856	417438	377623	-0.0701037	0.32016	0.496878	glutamate 5-kinase
3.2.1.185	207967	183079	225645	211362	0.106176	0.322942	0.50028	non-reducing end beta-L-arabinofuranosidase
4.1.2.42	324811	305633	353262	338717	0.0803068	0.32284	0.50028	D-threonine aldolase
3.5.4.28	1.52603e+06	1.62041e+06	1.56015e+06	1.55824e+06	-0.066857	0.324577	0.50056	S-adenosylhomocysteine deaminase
3.5.1.102	838.728	435.11	542.107	428.016	-0.447784	0.323917	0.50056	2-amino-5-formylamino-6-ribosylaminopyrimidin-4(3H)-one 5'-monophosphate deformylase
3.5.4.31	1.52603e+06	1.62041e+06	1.56015e+06	1.55824e+06	-0.066857	0.324577	0.50056	S-methyl-5'-thioadenosine deaminase
1.2.1.59	21902.6	37906.7	34651.1	42262.7	0.310475	0.324597	0.50056	glyceraldehyde-3-phosphate dehydrogenase (NAD(P)+) (phosphorylating)
2.3.2.8	240675	232881	246979	214277	-0.0951123	0.323968	0.50056	arginyltransferase
1.1.1.266	99458.5	88832.6	101016	73206.4	-0.17358	0.325404	0.500895	dTDP-4-dehydro-6-deoxyglucose reductase
3.6.3.41	222685	200737	215761	194093	-0.102486	0.325351	0.500895	heme-transporting ATPase
1.1.1.233	5781.28	4263.24	4024.98	4480.31	-0.287687	0.326315	0.501842	N-acylmannosamine 1-dehydrogenase
1.11.1.5	187893	198754	195782	177878	-0.105895	0.32694	0.502241	cytochrome-c peroxidase
1.1.1.335	19960.7	21049.4	23980.3	25180.8	0.209085	0.327462	0.502241	UDP-N-acetyl-2-amino-2-deoxyglucuronate dehydrogenase
3.1.26.11	1.29615e+06	1.32788e+06	1.37302e+06	1.25721e+06	-0.0526983	0.327274	0.502241	tRNase Z
3.5.1.15	203.317	336.525	319.963	455.341	0.473149	0.328404	0.502782	aspartoacylase
3.2.1.179	45446.4	51726.7	52345.2	63728	0.207484	0.328407	0.502782	gellan tetrasaccharide unsaturated glucuronyl hydrolase
1.14.14.3	449515	527435	554874	530183	0.0953503	0.329448	0.503922	alkanal monooxygenase (FMN)
3.6.1.22	280536	270544	275770	263733	-0.084971	0.331507	0.505705	NAD+ diphosphatase
5.3.3.2	150655	160717	169337	183246	0.12763	0.331442	0.505705	isopentenyl-diphosphate Delta-isomerase
1.4.3.-	614591	602787	641678	575419	-0.0566545	0.332411	0.506628	With oxygen as acceptor
2.1.1.216	861.058	733.309	1440.45	766.256	0.399351	0.334147	0.508818	tRNA (guanine26-N2)-dimethyltransferase
2.6.1.39	301653	287074	328527	317967	0.0811542	0.334545	0.508967	2-aminoadipate transaminase
1.1.1.51	22586.1	20652.3	20884	18174.3	-0.203246	0.336264	0.509844	3(or 17)beta-hydroxysteroid dehydrogenase
1.1.1.100	6.42636e+06	6.40042e+06	6.66163e+06	6.2415e+06	-0.0466423	0.335588	0.509844	3-oxoacyl-[acyl-carrier-protein] reductase
1.14.13.127	218137	178651	214763	158852	-0.147031	0.336799	0.509844	3-(3-hydroxyphenyl)propanoate hydroxylase
4.1.1.82	27950.4	38161.7	36375.5	44830.7	0.246558	0.336923	0.509844	phosphonopyruvate decarboxylase
3.2.1.2	1204.51	1413.97	1909.56	1507.97	0.322686	0.336503	0.509844	beta-amylase
2.7.7.62	766.091	641.927	1194.97	723.156	0.380075	0.336014	0.509844	adenosylcobinamide-phosphate guanylyltransferase
1.3.99.26	9542.48	8477.2	11846.2	10122.6	0.229115	0.337783	0.51069	all-trans-zeta-carotene desaturase
3.1.4.56	6094.32	6703.42	6467.51	9789.25	0.302625	0.33878	0.511742	7,8-dihydroneopterin 2',3'-cyclic phosphate phosphodiesterase
4.2.1.39	349729	372172	353398	353295	-0.0846468	0.339933	0.512571	gluconate dehydratase
3.4.22.40	26068.1	22730.3	26620.1	16148.4	-0.25651	0.339744	0.512571	bleomycin hydrolase
5.1.1.12	91822.3	106654	123257	105580	0.146265	0.340794	0.51291	ornithine racemase
1.14.12.19	204535	220374	223733	186986	-0.108143	0.341064	0.51291	3-phenylpropanoate dioxygenase
2.4.2.31	8369.55	9902.68	11840.5	10542.8	0.234611	0.340789	0.51291	NAD+---protein-arginine ADP-ribosyltransferase
2.3.1.15	62920.7	66068.4	74584.8	74532.2	0.155371	0.34177	0.513517	glycerol-3-phosphate 1-O-acyltransferase
1.1.1.145	214084	190239	256725	200517	0.118063	0.342745	0.514527	3beta-hydroxy-Delta5-steroid dehydrogenase
3.5.1.14	10783.4	8562.14	7636.82	9090.32	-0.256243	0.343889	0.515788	N-acyl-aliphatic-L-amino acid amidohydrolase
1.2.1.41	405745	397288	412165	384834	-0.0660375	0.345882	0.517862	glutamate-5-semialdehyde dehydrogenase
3.1.2.26	9199.98	8703.9	9312	6397.05	-0.252186	0.345791	0.517862	bile-acid-CoA hydrolase
2.1.1.179	3250.5	4430.83	5957.55	3977.94	0.303947	0.346591	0.518467	16S rRNA (guanine1405-N7)-methyltransferase
5.3.1.9	785924	789020	840140	737612	-0.054557	0.347501	0.51937	glucose-6-phosphate isomerase
1.13.11.74	5340.38	10153.7	10234.7	10104.5	0.333409	0.348859	0.520484	2-aminophenol 1,6-dioxygenase
3.5.1.-	5.65815e+06	5.60817e+06	5.8679e+06	5.47796e+06	-0.045117	0.348601	0.520484	In linear amides
2.3.1.117	397664	361111	385364	363417	-0.0733465	0.351305	0.522085	2,3,4,5-tetrahydropyridine-2,6-dicarboxylate N-succinyltransferase
2.3.2.2	1.99368e+06	1.99366e+06	2.00919e+06	1.98139e+06	-0.0526115	0.350916	0.522085	gamma-glutamyltransferase
2.4.2.28	380302	394436	394340	372060	-0.0709682	0.351064	0.522085	S-methyl-5'-thioadenosine phosphorylase
2.7.7.47	20440.5	23058.8	27179.1	24690.3	0.196693	0.351447	0.522085	streptomycin 3''-adenylyltransferase
2.6.1.37	97419.7	115682	117482	128445	0.154359	0.352662	0.523398	2-aminoethylphosphonate---pyruvate transaminase
2.4.2.8	495410	473289	530943	519183	0.0628178	0.353327	0.523927	hypoxanthine phosphoribosyltransferase
5.1.1.17	363902	389267	397136	438635	0.0989987	0.354025	0.524504	isopenicillin-N epimerase
1.13.11.43	47450.2	42033.8	57028.5	47720.1	0.169827	0.355335	0.525225	lignostilbene alphabeta-dioxygenase
4.1.-.-	55084.7	49768.1	63308.1	58242.2	0.158301	0.355749	0.525225	Carbon-carbon lyases
2.6.1.87	131543	139922	153023	152352	0.115773	0.355511	0.525225	UDP-4-amino-4-deoxy-L-arabinose aminotransferase
1.18.1.2	595484	591448	630813	556333	-0.0566451	0.356356	0.525264	ferredoxin---NADP+ reductase
6.5.1.1	1.21773e+06	1.11171e+06	1.1987e+06	1.132e+06	-0.0534428	0.356394	0.525264	DNA ligase (ATP)
3.1.31.-	186.592	237.656	284.638	293.914	0.391324	0.356926	0.525592	Endoribonucleases active with either ribo- or deoxyribonucleic acids and producing 3'-phosphomonoesters
1.1.1.308	3955.15	3345.38	4836.03	4204.82	0.252662	0.35856	0.52754	sulfopropanediol 3-dehydrogenase
2.4.2.19	475795	460387	483059	449906	-0.0600903	0.359123	0.52791	nicotinate-nucleotide diphosphorylase (carboxylating)
3.1.22.4	511285	484175	511458	480692	-0.0594839	0.360852	0.529536	crossover junction endodeoxyribonuclease
2.4.1.246	35511.1	33431.5	40429.3	40122.5	0.17146	0.36243	0.530934	mannosylfructose-phosphate synthase
3.5.1.23	26229	28614.5	35275.9	29662.5	0.184706	0.362318	0.530934	ceramidase
1.1.1.304	199981	204520	205062	189127	-0.0931395	0.362774	0.530979	diacetyl reductase [(S)-acetoin forming]
4.2.1.85	4040.66	3474.71	4539.94	4719.65	0.250049	0.363787	0.532003	dimethylmaleate hydratase
2.4.1.10	542.394	221.373	352.912	789.804	0.558197	0.364983	0.532726	levansucrase
3.1.3.11	630483	586653	627648	589124	-0.0549951	0.36533	0.532726	fructose-bisphosphatase
6.1.1.-	311916	287924	303771	286310	-0.0780409	0.365467	0.532726	Ligases forming aminoacyl-tRNA and related compounds
2.3.2.13	62339.3	67283.7	80641.4	69063.4	0.14933	0.366838	0.532816	protein-glutamine gamma-glutamyltransferase
2.4.1.290	103390	102282	108631	86675.1	-0.134322	0.366992	0.532816	N,N'-diacetylbacillosaminyl-diphospho-undecaprenol alpha-1,3-N-acetylgalactosaminyltransferase
4.2.1.83	129628	111291	123497	105812	-0.12772	0.366889	0.532816	4-oxalomesaconate hydratase
1.4.1.3	466709	483005	521594	509627	0.0644471	0.367167	0.532816	glutamate dehydrogenase [NAD(P)+]
1.1.3.21	1776.67	2420.98	2333.76	3090.13	0.321491	0.368158	0.533797	glycerol-3-phosphate oxidase
3.1.3.7	268755	241198	268091	230447	-0.0894172	0.369375	0.534194	3'(2'),5'-bisphosphate nucleotidase
1.1.3.12	6357.19	4078.87	6603.53	6435.86	0.271029	0.368957	0.534194	pyridoxine 4-oxidase
3.7.1.17	345767	353716	364721	327741	-0.0711818	0.369224	0.534194	4,5:9,10-diseco-3-hydroxy-5,9,17-trioxoandrosta-1(10),2-diene-4-oate hydrolase
6.2.1.14	634.913	641.081	866.846	787.205	0.318068	0.370879	0.534195	6-carboxyhexanoate---CoA ligase
3.5.4.33	513701	533199	587081	546295	0.0587442	0.371165	0.534195	tRNA(adenine34) deaminase
1.14.20.1	469.416	392.1	724.592	441.742	0.373098	0.369794	0.534195	deacetoxycephalosporin-C synthase
4.4.99.-	2249.3	1262.82	1876.18	2810.09	0.37878	0.37047	0.534195	#N/A
3.2.1.1	259410	267675	299443	279398	0.0795013	0.370124	0.534195	alpha-amylase
2.6.1.81	1379.15	1605.54	1703.44	2120.76	0.308795	0.371264	0.534195	succinylornithine transaminase
1.2.1.32	53418.2	55849	62476.8	63755.1	0.155029	0.371962	0.534746	aminomuconate-semialdehyde dehydrogenase
4.2.1.9	738313	662727	720480	677598	-0.0572487	0.372896	0.535636	dihydroxy-acid dehydratase
2.1.1.164	323713	316147	353745	269245	-0.0994818	0.37374	0.536394	demethylrebeccamycin-D-glucose O-methyltransferase
2.8.1.2	422745	380920	407592	387619	-0.069168	0.374339	0.536585	3-mercaptopyruvate sulfurtransferase
1.3.8.2	628.371	541.95	724.108	795.621	0.327973	0.375448	0.536585	4,4'-diapophytoene desaturase (4,4'-diapolycopene-forming)
6.3.4.3	344674	311008	325985	318376	-0.0782911	0.374872	0.536585	formate---tetrahydrofolate ligase
4.2.3.7	467.348	592.422	801.773	602.598	0.344435	0.375769	0.536585	pentalenene synthase
3.1.1.73	137474	111815	151461	131557	0.127463	0.375724	0.536585	feruloyl esterase
2.7.7.77	439433	411405	458720	384191	-0.0713658	0.375484	0.536585	molybdenum cofactor guanylyltransferase
2.4.2.48	3839.98	3857.06	5251.53	4221.43	0.2399	0.376584	0.537121	tRNA-guanine15 transglycosylase
2.7.1.92	127304	111451	139419	129321	0.116306	0.377199	0.537121	5-dehydro-2-deoxygluconokinase
3.5.1.26	139649	154002	172567	156709	0.108216	0.37741	0.537121	N4-(beta-N-acetylglucosaminyl)-L-asparaginase
3.6.1.61	288461	263863	285195	257855	-0.0799125	0.376807	0.537121	diadenosine hexaphosphate hydrolase (ATP-forming)
4.2.2.6	65447.2	61449	72351.4	73033.9	0.143664	0.379619	0.538192	oligogalacturonide lyase
1.1.1.42	780558	808282	868409	844593	0.0540755	0.37979	0.538192	isocitrate dehydrogenase (NADP+)
4.1.99.17	450042	477466	475187	446348	-0.0650015	0.379284	0.538192	phosphomethylpyrimidine synthase
5.1.3.1	729674	755974	775652	714504	-0.0516601	0.378944	0.538192	ribulose-phosphate 3-epimerase
2.1.1.170	227638	228406	237288	209971	-0.0849608	0.380698	0.538192	16S rRNA (guanine527-N7)-methyltransferase
3.5.3.19	37720	40809.2	48882.4	42710.2	0.164084	0.378783	0.538192	ureidoglycolate hydrolase
4.4.1.3	6549.46	6930.77	8699.63	7599.93	0.216329	0.380277	0.538192	dimethylpropiothetin dethiomethylase
2.7.1.45	414452	373483	412842	367650	-0.0694779	0.380523	0.538192	2-dehydro-3-deoxygluconokinase
5.3.1.25	3479.14	4615.97	5425.41	4641.21	0.254137	0.382002	0.539585	L-fucose isomerase
3.5.2.15	49894.5	48633.5	50993.2	40812.2	-0.161472	0.38282	0.539866	cyanuric acid amidohydrolase
2.3.1.43	27597.1	27583.7	34644.4	30015.4	0.171214	0.382836	0.539866	phosphatidylcholine---sterol O-acyltransferase
1.8.2.-	220980	209697	214195	206795	-0.0867504	0.384696	0.540692	With a cytochrome as acceptor
2.5.1.88	51945.5	32037.2	39608.6	34878.8	-0.225976	0.384566	0.540692	trans,polycis-polyprenyl diphosphate synthase [(2Z,6E)-farnesyl diphosphate specific]
1.7.2.1	270534	298043	289680	352578	0.127154	0.383827	0.540692	nitrite reductase (NO-forming)
1.2.1.70	391270	382176	435798	402426	0.0605851	0.384226	0.540692	glutamyl-tRNA reductase
1.2.1.11	696784	709823	723459	687870	-0.0501465	0.385535	0.540949	aspartate-semialdehyde dehydrogenase
1.14.13.59	14940.8	18142.3	19005.4	9316.98	-0.298858	0.385711	0.540949	L-lysine N6-monooxygenase (NADPH)
2.3.1.194	2374.6	2675.35	2976.91	3301.55	0.262753	0.385835	0.540949	acetoacetyl-CoA synthase
1.2.7.5	150205	220953	197793	241457	0.191984	0.387031	0.541244	aldehyde ferredoxin oxidoreductase
3.2.2.24	78698.9	73286.8	89848.3	82913.7	0.129793	0.386836	0.541244	ADP-ribosyl-[dinitrogen reductase] hydrolase
3.1.21.5	8070.07	11875.8	12935.4	11684.9	0.244148	0.38732	0.541244	type III site-specific deoxyribonuclease
1.1.98.2	1.46417e+06	1.39948e+06	1.44644e+06	1.42555e+06	-0.0492095	0.386558	0.541244	glucose-6-phosphate dehydrogenase (coenzyme-F420)
1.4.3.19	37998.1	46495.9	52603.7	46534.4	0.171968	0.389016	0.542826	glycine oxidase
2.7.7.59	388837	387955	408146	365254	-0.0628418	0.389634	0.542826	[protein-PII] uridylyltransferase
2.3.3.14	76197.7	86481	92179.1	93759.6	0.138808	0.390051	0.542826	homocitrate synthase
3.1.21.7	113280	123516	144986	122642	0.117683	0.389885	0.542826	deoxyribonuclease V
5.3.1.6	645571	630718	675182	607861	-0.0485607	0.389216	0.542826	ribose-5-phosphate isomerase
4.-.-.-	1.71199e+06	1.69245e+06	1.78545e+06	1.64977e+06	-0.0425477	0.390532	0.543001	Lyases
6.3.4.-	2888.4	2220.4	4551.54	2227.87	0.337766	0.390816	0.543001	Other carbon--nitrogen ligases
1.1.1.88	29361	39279.1	39939	41724.8	0.19601	0.392469	0.543961	hydroxymethylglutaryl-CoA reductase
3.2.2.28	208335	203969	225299	229624	0.089258	0.392389	0.543961	double-stranded uracil-DNA glycosylase
2.7.8.14	1454.7	1951.79	1646.12	1241.99	-0.302232	0.392981	0.544227	CDP-ribitol ribitolphosphotransferase
3.6.3.24	2237.42	2233.75	2543.34	3009.08	0.263759	0.397219	0.544764	nickel-transporting ATPase
2.4.1.18	728614	748269	797053	682838	-0.0550861	0.397142	0.544764	1,4-alpha-glucan branching enzyme
1.-.-.-	3.21247e+07	3.16749e+07	3.409e+07	3.04066e+07	-0.040844	0.396596	0.544764	Oxidoreductases
3.1.3.74	7526.34	5100.06	8531.93	7023.86	0.245485	0.394836	0.544764	pyridoxal phosphatase
3.6.3.30	451209	487673	507722	516901	0.0725332	0.396172	0.544764	Fe3+-transporting ATPase
1.3.1.21	16564.7	20927	23110.7	21635.6	0.197929	0.395415	0.544764	7-dehydrocholesterol reductase
4.2.3.1	1.27583e+06	1.28077e+06	1.32597e+06	1.24993e+06	-0.0442453	0.394958	0.544764	threonine synthase
5.3.1.5	287114	246091	296706	290785	0.0872559	0.39512	0.544764	xylose isomerase
1.10.2.2	228086	211778	230811	200167	-0.0862422	0.396812	0.544764	quinol---cytochrome-c reductase
1.14.13.84	46545.8	36235	46969.4	49775	0.175305	0.397149	0.544764	4-hydroxyacetophenone monooxygenase
4.1.2.20	279942	315550	327264	330745	0.0899081	0.393893	0.544764	2-dehydro-3-deoxyglucarate aldolase
2.7.1.78	10042.9	12673.3	12824	14663.9	0.22351	0.395054	0.544764	polynucleotide 5'-hydroxyl-kinase
3.5.2.17	173486	172465	187101	197065	0.0993102	0.398775	0.546457	hydroxyisourate hydrolase
6.3.4.18	267003	245839	297985	264439	0.0770726	0.399278	0.546705	5-(carboxyamino)imidazole ribonucleotide synthase
3.1.4.55	8299.6	7736.13	10667.2	8598.92	0.205843	0.40064	0.547246	phosphoribosyl 1,2-cyclic phosphate phosphodiesterase
2.7.8.8	348494	383106	409295	390796	0.0735872	0.400567	0.547246	CDP-diacylglycerol---serine O-phosphatidyltransferase
2.3.1.128	1.00715e+06	941927	1.04298e+06	916634	-0.0487068	0.400409	0.547246	ribosomal-protein-alanine N-acetyltransferase
2.5.1.9	529707	508322	536401	503173	-0.0527027	0.402208	0.548505	riboflavin synthase
1.6.1.1	290333	370293	385759	356481	0.110319	0.402166	0.548505	NAD(P)+ transhydrogenase (Si-specific)
2.7.4.25	720809	699474	773993	648388	-0.0560371	0.402591	0.548587	(d)CMP kinase
3.1.26.4	899646	876549	995765	907205	0.0436502	0.402978	0.548674	ribonuclease H
2.7.8.31	531472	563192	618916	564894	0.0564599	0.407485	0.551167	undecaprenyl-phosphate glucose phosphotransferase
6.3.2.4	776743	797513	859819	832075	0.0494229	0.407731	0.551167	D-alanine---D-alanine ligase
3.1.4.-	682765	712474	735760	665350	-0.0505622	0.407424	0.551167	Phosphoric diester hydrolases
3.5.1.11	237083	253565	287967	252364	0.0814276	0.405936	0.551167	penicillin amidase
1.8.1.4	1.34178e+06	1.27231e+06	1.34843e+06	1.28447e+06	-0.0439619	0.405523	0.551167	dihydrolipoyl dehydrogenase
1.13.11.57	227119	259609	233328	238605	-0.0984356	0.407056	0.551167	gallate dioxygenase
4.2.1.144	20913.8	22372	27867.5	23063.1	0.175263	0.406825	0.551167	3-amino-5-hydroxybenzoate synthase
6.2.1.26	437455	372993	428189	370840	-0.0765718	0.406782	0.551167	o-succinylbenzoate---CoA ligase
3.6.1.45	107886	116880	119910	134660	0.128864	0.405638	0.551167	UDP-sugar diphosphatase
3.2.1.52	565645	535133	594810	505509	-0.0581386	0.408494	0.55176	beta-N-acetylhexosaminidase
5.4.99.24	157462	152884	180376	163198	0.0907633	0.409665	0.552901	23S rRNA pseudouridine955/2504/2580 synthase
2.1.3.2	589175	580017	585477	582943	-0.0543224	0.410184	0.553162	aspartate carbamoyltransferase
4.2.1.59	932738	908823	962526	895342	-0.0425014	0.413012	0.553354	3-hydroxyacyl-[acyl-carrier-protein] dehydratase
2.1.1.45	277139	270631	281363	260597	-0.0707464	0.41229	0.553354	thymidylate synthase
2.1.1.246	27388.5	43778.6	41201.2	45363.6	0.227942	0.411375	0.553354	[methyl-Co(III) methanol-specific corrinoid protein]:coenzyme M methyltransferase
2.4.1.278	41417.7	34646	46083.9	42000.4	0.157182	0.41326	0.553354	3-alpha-mycarosylerythronolide B desosaminyl transferase
4.1.3.1	226908	216026	235324	199630	-0.0838719	0.413209	0.553354	isocitrate lyase
1.1.1.329	144278	154407	166889	165268	0.0989919	0.41246	0.553354	2-deoxy-scyllo-inosamine dehydrogenase
2.1.1.-	1.62446e+07	1.62436e+07	1.72281e+07	1.56403e+07	-0.0393543	0.412822	0.553354	Methyltransferases
2.3.3.-	409749	411998	429721	391193	-0.0575715	0.412084	0.553354	Acyl groups converted into alkyl groups on transfer
2.6.1.84	119132	113103	125240	97420.4	-0.120817	0.413208	0.553354	arginine---pyruvate transaminase
3.1.11.-	826953	778654	861589	865694	0.0526622	0.413586	0.553355	Exodeoxyribonucleases producing 5'-phosphomonoesters
1.13.11.46	4823.17	4798.74	4685.82	3942.67	-0.215378	0.415225	0.554896	4-hydroxymandelate synthase
1.2.1.16	194328	255060	256794	252303	0.12375	0.415392	0.554896	succinate-semialdehyde dehydrogenase [NAD(P)+]
2.4.-.-	6.49127e+06	6.87439e+06	7.68644e+06	6.71839e+06	0.0503024	0.416192	0.555323	Glycosyltransferases
1.8.98.1	132718	123122	127002	120346	-0.102966	0.416365	0.555323	CoB---CoM heterodisulfide reductase
4.1.1.73	248551	225115	244691	221153	-0.0794306	0.417036	0.555344	tartrate decarboxylase
1.1.1.93	248551	225115	244691	221153	-0.0794306	0.417036	0.555344	tartrate dehydrogenase
2.3.1.8	374676	331023	360241	337838	-0.0698019	0.417903	0.556063	phosphate acetyltransferase
3.2.1.23	297782	268548	360097	271731	0.0974028	0.418445	0.556349	beta-galactosidase
1.2.1.68	71826	73515.8	84582.2	79934.4	0.12358	0.418922	0.556413	coniferyl-aldehyde dehydrogenase
1.4.1.-	39063	30196.4	34293.3	29605.5	-0.171578	0.420945	0.558361	With NAD(+) or NADP(+) as acceptor
3.2.1.21	1.0953e+06	959737	1.11865e+06	1.09929e+06	0.0573203	0.422246	0.558963	beta-glucosidase
1.21.4.4	40154.2	72059.6	59767	79455.1	0.260872	0.422452	0.558963	betaine reductase
3.4.24.-	7.00789e+06	7.01e+06	7.68901e+06	7.27728e+06	0.0394952	0.422716	0.558963	Metalloendopeptidases
2.3.1.19	20702.3	16488.1	21070.7	11874.3	-0.24227	0.421977	0.558963	phosphate butyryltransferase
2.3.1.29	195913	183450	214061	202953	0.0821851	0.423606	0.559268	glycine C-acetyltransferase
1.3.1.56	12938.7	9619.2	11486.1	8769.49	-0.213847	0.423385	0.559268	cis-2,3-dihydrobiphenyl-2,3-diol dehydrogenase
6.4.1.7	5604.47	11839.6	9263.36	13537.1	0.337379	0.424527	0.56005	2-oxoglutarate carboxylase
1.1.1.103	545042	540290	574195	516340	-0.0494348	0.426021	0.561583	L-threonine 3-dehydrogenase
4.1.1.86	796749	738503	843721	802181	0.0462397	0.426844	0.562109	diaminobutyrate decarboxylase
6.3.5.3	1.10953e+06	1.08371e+06	1.13129e+06	1.08152e+06	-0.0416467	0.427082	0.562109	phosphoribosylformylglycinamidine synthase
1.1.1.122	84063.2	76453.3	90238.7	90694.1	0.120322	0.429595	0.56297	D-threo-aldose 1-dehydrogenase
2.7.7.24	687201	693849	759854	719941	0.0446274	0.428744	0.56297	glucose-1-phosphate thymidylyltransferase
3.5.1.5	838258	948431	917817	860887	-0.0627405	0.429213	0.56297	urease
3.6.3.-	1.75922e+07	1.74686e+07	1.88991e+07	1.85645e+07	0.0418013	0.429523	0.56297	Acting on acid anhydrides; catalyzing transmembrane movement of substances
2.5.1.46	69111.3	90985.3	93001.4	91725.3	0.150305	0.429725	0.56297	deoxyhypusine synthase
6.3.5.-	3.91603e+06	3.86157e+06	4.07963e+06	3.79145e+06	-0.0381153	0.429442	0.56297	Carbon--nitrogen ligases with glutamine as amido-N-donor
1.8.5.3	46577.5	66597.4	63146.1	70472.6	0.186259	0.431029	0.563276	dimethylsulfoxide reductase
5.99.1.2	905269	834003	958103	905815	0.0455837	0.430712	0.563276	DNA topoisomerase
1.2.1.80	6216.56	5893.04	8117.07	6390.68	0.200943	0.431448	0.563276	long-chain acyl-[acyl-carrier-protein] reductase
4.4.1.5	1.33938e+06	1.37213e+06	1.4018e+06	1.33229e+06	-0.0430771	0.431502	0.563276	lactoylglutathione lyase
4.2.1.132	73283.2	52254.8	63761.3	52474.6	-0.167087	0.431618	0.563276	2-hydroxyhexa-2,4-dienoate hydratase
3.5.1.81	1.06222e+06	1.19952e+06	1.20601e+06	1.26139e+06	0.0724055	0.432475	0.563962	N-acyl-D-amino-acid deacylase
1.14.13.20	27647.2	26296.4	35631.8	27359.2	0.163256	0.43456	0.564897	2,4-dichlorophenol 6-monooxygenase
6.3.2.33	86979.4	76576.5	92712.3	91550.4	0.119345	0.43502	0.564897	tetrahydrosarcinapterin synthase
5.4.2.2	768924	790224	834919	735227	-0.0471038	0.43498	0.564897	phosphoglucomutase (alpha-D-glucose-1,6-bisphosphate-dependent)
2.5.1.2	2030.18	2088.69	2965.25	2141.14	0.247078	0.435206	0.564897	thiamine pyridinylase
3.7.1.14	340121	324775	371011	349101	0.060375	0.434591	0.564897	2-hydroxy-6-oxonona-2,4-dienedioate hydrolase
6.3.5.4	1.85703e+06	2.0875e+06	2.23059e+06	2.04268e+06	0.0585781	0.435522	0.564897	asparagine synthase (glutamine-hydrolysing)
3.8.1.-	17636.5	31750.7	25916.4	35823.7	0.272866	0.437228	0.566677	In C-halide compounds
6.3.4.14	1.34113e+06	1.29884e+06	1.34108e+06	1.31764e+06	-0.0433985	0.437649	0.56679	biotin carboxylase
2.7.4.9	799906	817934	901331	831609	0.0432812	0.438004	0.566817	dTMP kinase
2.7.1.89	4688.8	3468.01	4934.64	4918	0.221616	0.439009	0.567254	thiamine kinase
1.8.1.14	79886.5	60488.1	78019.9	51386.8	-0.180139	0.438757	0.567254	CoA-disulfide reductase
2.3.1.179	1.61207e+06	1.59875e+06	1.65514e+06	1.5876e+06	-0.0402264	0.439623	0.567615	beta-ketoacyl-[acyl-carrier-protein] synthase II
2.7.1.95	68167.1	51475.2	62283.3	49240.5	-0.159026	0.440252	0.567996	kanamycin kinase
4.1.99.5	2737.78	2739.84	3016.61	1751.43	-0.268778	0.440914	0.568418	aldehyde oxygenase (deformylating)
5.3.3.4	74871	62892.2	81385.4	43106	-0.215668	0.441365	0.568567	muconolactone Delta-isomerase
2.4.1.109	60703.4	42273.1	56285.8	37470	-0.197089	0.442701	0.569856	dolichyl-phosphate-mannose---protein mannosyltransferase
6.1.1.13	264255	282178	307778	288669	0.0705701	0.443282	0.570171	D-alanine---poly(phosphoribitol) ligase
1.21.-.-	126893	135623	143680	109340	-0.114874	0.443961	0.570613	Catalyzing the reaction X-H + Y-H = 'X-Y'
1.6.1.2	1.17567e+06	1.11579e+06	1.19554e+06	1.11996e+06	-0.0397398	0.445015	0.571103	NAD(P)+ transhydrogenase (Re/Si-specific)
2.3.1.182	11312	9316.28	10253.8	14557.2	0.224514	0.44479	0.571103	(R)-citramalate synthase
1.2.1.85	90967	79346	89933.2	72799	-0.123905	0.447586	0.573334	2-hydroxymuconate-6-semialdehyde dehydrogenase
1.8.1.5	5244.83	3614.75	4829.44	2884.24	-0.26461	0.447369	0.573334	2-oxopropyl-CoM reductase (carboxylating)
3.5.1.101	55153.1	43184.9	49716.1	42328.3	-0.151278	0.447767	0.573334	L-proline amide hydrolase
3.4.11.23	13566.7	12903.4	16807.2	14192.9	0.170149	0.448731	0.574136	PepB aminopeptidase
1.1.1.50	54104.8	41934.3	53402.4	57151.7	0.15381	0.450901	0.574746	3alpha-hydroxysteroid 3-dehydrogenase (Si-specific)
2.4.2.46	2432.43	1334.94	2110.03	968.254	-0.360952	0.449986	0.574746	galactan 5-O-arabinofuranosyltransferase
6.2.1.1	1.19391e+06	1.14855e+06	1.20681e+06	1.15879e+06	-0.0400212	0.450611	0.574746	acetate---CoA ligase
2.5.1.48	480507	477391	513019	519809	0.0557059	0.450695	0.574746	cystathionine gamma-synthase
6.3.1.1	7123.94	4502.85	7239.53	1918.8	-0.427171	0.449842	0.574746	aspartate---ammonia ligase
2.1.1.86	6095.84	3445.52	5753.16	1911.09	-0.393585	0.451325	0.574855	tetrahydromethanopterin S-methyltransferase
1.11.1.6	72043.2	80495	89562.1	82709	0.118898	0.452713	0.576191	catalase
1.21.4.3	41168.1	72369.5	58582.1	80529.6	0.243915	0.453407	0.576641	sarcosine reductase
3.1.3.6	31390.9	37807.7	37587.9	42747.9	0.163963	0.455164	0.576718	3'-nucleotidase
3.5.3.6	197666	145700	177733	150617	-0.119983	0.454436	0.576718	arginine deiminase
1.20.1.1	7346.59	9146.16	8571.45	11252.5	0.217801	0.454898	0.576718	phosphonate dehydrogenase
5.4.99.2	1.14544e+06	1.13185e+06	1.16002e+06	1.1365e+06	-0.0417288	0.455817	0.576718	methylmalonyl-CoA mutase
3.4.21.102	1.0819e+06	1.10035e+06	1.1953e+06	1.00059e+06	-0.0496063	0.456524	0.576718	C-terminal processing peptidase
2.5.1.29	34443.4	28261.3	41743.3	31417.8	0.162777	0.454173	0.576718	geranylgeranyl diphosphate synthase
1.8.4.14	12125.9	15602.1	18056.1	14872.2	0.186896	0.455535	0.576718	L-methionine (R)-S-oxide reductase
5.4.4.2	86540	65703.5	77354.7	66300.4	-0.139177	0.456416	0.576718	isochorismate synthase
2.5.1.65	124509	85772.3	98019.1	98539.8	-0.147384	0.45623	0.576718	O-phosphoserine sulfhydrylase
3.1.3.25	825081	796785	852323	787564	-0.0393911	0.457004	0.576896	inositol-phosphate phosphatase
4.2.1.49	387950	356062	411687	391784	0.0568687	0.457723	0.576945	urocanate hydratase
3.1.11.1	4844.51	5835.72	7433.21	5459.34	0.207704	0.457678	0.576945	exodeoxyribonuclease I
1.1.1.6	27991.1	25782.3	31503	17040.9	-0.217345	0.458106	0.577	glycerol dehydrogenase
2.3.1.122	18725.5	18540.8	23894.9	19464	0.159301	0.459244	0.578004	trehalose O-mycolyltransferase
4.2.1.20	1.29935e+06	1.23313e+06	1.29924e+06	1.25698e+06	-0.0404113	0.459637	0.57807	tryptophan synthase
1.2.1.-	318819	303490	334241	341248	0.0659386	0.461372	0.578538	With NAD(+) or NADP(+) as acceptor
1.14.13.170	12152	10930.9	13210	13741.2	0.172158	0.461141	0.578538	pentalenolactone D synthase
3.2.1.178	1100.94	961.516	1529	1055.87	0.26279	0.461362	0.578538	beta-porphyranase
2.1.1.208	88421.5	68568	86364.9	60856.3	-0.153782	0.461144	0.578538	23S rRNA (uridine2479-2'-O)-methyltransferase
4.2.1.11	746945	718159	748310	728230	-0.0425992	0.461933	0.578813	phosphopyruvate hydratase
6.2.1.37	20498.1	20964.7	19822.9	18886.4	-0.154114	0.464007	0.580984	3-hydroxybenzoate---CoA ligase
1.5.1.28	99627	102817	116900	108476	0.0990225	0.464416	0.581067	opine dehydrogenase
1.1.1.136	441369	483516	499705	503576	0.0634279	0.465346	0.581218	UDP-N-acetylglucosamine 6-dehydrogenase
2.7.1.164	12690.5	16800.1	17745	7889.04	-0.280053	0.465563	0.581218	O-phosphoseryl-tRNASec kinase
1.16.-.-	230053	265801	295618	252118	0.0843955	0.465108	0.581218	Oxidizing metal ions
3.5.4.32	222754	174684	201343	184100	-0.0980466	0.466594	0.581838	8-oxoguanine deaminase
2.1.1.207	310789	323078	326452	304909	-0.0613805	0.466745	0.581838	tRNA (cytidine34-2'-O)-methyltransferase
2.7.1.170	229174	231402	250518	204129	-0.0779891	0.46809	0.582658	anhydro-N-acetylmuramic acid kinase
3.2.1.96	1348.07	1330.47	1945.65	1373.05	0.246506	0.467808	0.582658	mannosyl-glycoprotein endo-beta-N-acetylglucosaminidase
1.3.99.24	254.122	755.708	476.189	312.947	-0.429717	0.468558	0.582814	2-amino-4-deoxychorismate dehydrogenase
4.4.1.21	275.118	383.138	573.289	304.483	0.340954	0.469987	0.583736	S-ribosylhomocysteine lyase
3.1.11.6	888272	843537	919078	832910	-0.0390281	0.469856	0.583736	exodeoxyribonuclease VII
1.9.3.1	3.76168e+06	3.89929e+06	4.13848e+06	3.60349e+06	-0.0424676	0.470452	0.583887	cytochrome-c oxidase
4.2.1.109	97333.9	113450	114596	122225	0.11516	0.470871	0.583979	methylthioribulose 1-phosphate dehydratase
1.14.13.156	118366	93618.8	114537	87672.3	-0.127067	0.471905	0.584835	1,8-cineole 2-endo-monooxygenase
2.4.2.29	532110	538291	577979	570994	0.0483648	0.473889	0.585986	tRNA-guanosine34 transglycosylase
2.4.1.58	1472.78	1000.39	1326.15	788.384	-0.290791	0.473779	0.585986	lipopolysaccharide glucosyltransferase I
4.1.1.31	279943	266309	283002	260640	-0.0622061	0.474214	0.585986	phosphoenolpyruvate carboxylase
5.5.1.7	33313.3	32929.8	30563.6	31727.2	-0.140964	0.474194	0.585986	chloromuconate cycloisomerase
3.2.1.70	866.449	601.296	794.934	444.322	-0.309928	0.476954	0.588515	glucan 1,6-alpha-glucosidase
2.7.1.19	68937.7	53396.7	67277.9	47268.7	-0.15607	0.47694	0.588515	phosphoribulokinase
6.1.2.1	817.493	857.046	1084.76	978.107	0.244678	0.477538	0.588807	D-alanine---(R)-lactate ligase
1.1.1.163	214509	225237	252080	227999	0.0699328	0.47832	0.589343	cyclopentanol dehydrogenase
1.8.99.-	20399.6	27921.7	26060.5	30830.4	0.184211	0.479282	0.589404	With other acceptors
4.2.1.36	2150.3	2872.89	2955.87	3147.85	0.227107	0.478991	0.589404	homoaconitate hydratase
2.8.3.15	458378	567725	509296	498028	-0.0825161	0.479753	0.589404	succinyl-CoA:(R)-benzylsuccinate CoA-transferase
2.7.1.17	383636	323639	417836	354695	0.0707434	0.479757	0.589404	xylulokinase
2.3.1.101	144191	118937	148705	143256	0.0972309	0.48055	0.589951	formylmethanofuran---tetrahydromethanopterin N-formyltransferase
5.1.1.3	358605	331228	351925	336535	-0.0568428	0.482948	0.592466	glutamate racemase
2.3.1.60	62830.3	40336.5	58012.8	35613.1	-0.203291	0.484787	0.593618	gentamicin 3'-N-acetyltransferase
5.4.99.25	488673	469397	506268	458570	-0.045699	0.484415	0.593618	tRNA pseudouridine55 synthase
2.4.1.129	301183	282837	294151	286749	-0.0612915	0.485285	0.593618	peptidoglycan glycosyltransferase
2.7.7.63	32561.6	28138.4	39785.6	30297.9	0.147532	0.485245	0.593618	lipoate---protein ligase
1.4.3.3	133880	140254	142356	126225	-0.0867383	0.486554	0.594126	D-amino-acid oxidase
2.3.1.79	78161.1	65686.2	76822.8	60530.2	-0.125303	0.48675	0.594126	maltose O-acetyltransferase
1.21.4.2	134610	262751	205858	275923	0.227234	0.486127	0.594126	glycine reductase
5.4.2.7	135721	122150	136871	148801	0.097622	0.487159	0.594198	phosphopentomutase
4.2.1.28	32808.6	20465.4	28957.9	33916	0.194166	0.489526	0.596227	propanediol dehydratase
3.5.4.39	55537	37716	39829.3	45766.9	-0.169716	0.490169	0.596583	GTP cyclohydrolase IV
2.7.1.71	682537	647597	708080	637878	-0.0388417	0.491031	0.597204	shikimate kinase
3.2.1.-	1.40445e+06	1.3073e+06	1.49812e+06	1.23102e+06	-0.0491279	0.491831	0.597336	Glycosidases, ie enzymes hydrolyzing O- and S-glycosyl compounds
2.7.7.75	234109	207352	228476	208018	-0.0713292	0.492139	0.597336	molybdopterin adenylyltransferase
2.7.1.8	219422	198403	225288	187022	-0.0769806	0.492195	0.597336	glucosamine kinase
3.7.1.13	117981	133462	140010	138816	0.0944396	0.494089	0.599206	2-hydroxy-6-oxo-6-(2-aminophenyl)hexa-2,4-dienoate hydrolase
1.21.4.1	107850	143756	138830	145786	0.123388	0.496381	0.600564	D-proline reductase (dithiol)
3.6.1.7	390042	360740	427977	380941	0.0515751	0.496624	0.600564	acylphosphatase
2.3.1.47	658264	638697	719060	663616	0.0369194	0.496525	0.600564	8-amino-7-oxononanoate synthase
2.7.7.-	1.99234e+06	1.97321e+06	2.14055e+06	1.883e+06	-0.0360035	0.4976	0.601316	Nucleotidyltransferases
6.3.2.3	281490	277500	291230	266951	-0.0578301	0.498665	0.602176	glutathione synthase
1.7.1.6	77116.5	93516.2	91086.1	72478.9	-0.122576	0.499339	0.60256	azobenzene reductase
1.14.12.3	67718.1	74588.6	74317.5	62724.7	-0.113439	0.501514	0.604756	benzene 1,2-dioxygenase
5.4.99.9	90184.3	77438.6	91196.5	69921.4	-0.116723	0.502629	0.605335	UDP-galactopyranose mutase
2.3.1.16	995642	1.00241e+06	1.01496e+06	1.00263e+06	-0.0397467	0.502708	0.605335	acetyl-CoA C-acyltransferase
1.1.1.341	7945.07	8483.78	9512.53	9571.22	0.162335	0.503722	0.606126	CDP-abequose synthase
3.2.1.38	3242.81	2460.67	3028.13	3810.18	0.217042	0.504171	0.606237	beta-D-fucosidase
1.14.-.-	3.3405e+06	3.10619e+06	3.42687e+06	3.11202e+06	-0.0350136	0.50457	0.606288	Acting on paired donors, with incorporation or reduction of molecular oxygen The oxygen incorporated need not be derived from O(2)
3.6.1.23	382909	370083	376105	376816	-0.0531684	0.505073	0.606462	dUTP diphosphatase
2.7.1.66	43788.1	30916.3	43546.6	42305.1	0.149451	0.505715	0.606804	undecaprenol kinase
1.14.14.1	38556.7	29359.1	37112.8	26319.8	-0.159282	0.506536	0.60693	unspecific monooxygenase
1.6.2.4	38556.7	29359.1	37112.8	26319.8	-0.159282	0.506536	0.60693	NADPH---hemoprotein reductase
2.3.1.61	481493	438800	482557	442924	-0.0469108	0.510664	0.60759	dihydrolipoyllysine-residue succinyltransferase
2.4.2.7	575166	561612	582777	564337	-0.0410338	0.509792	0.60759	adenine phosphoribosyltransferase
2.7.8.35	54075.7	39834.2	48452	40070.9	-0.141383	0.509883	0.60759	UDP-N-acetylglucosamine---decaprenyl-phosphate N-acetylglucosaminephosphotransferase
2.4.2.53	1.6274e+06	1.7212e+06	1.86964e+06	1.70771e+06	0.0388856	0.510651	0.60759	undecaprenyl-phosphate 4-deoxy-4-formamido-L-arabinose transferase
3.1.3.15	526984	500540	547013	490056	-0.0427308	0.508435	0.60759	histidinol-phosphatase
3.2.-.-	846060	849784	963486	847521	0.037712	0.508698	0.60759	Glycosylases
1.1.1.28	41397.5	38818.6	41677.7	34929.9	-0.124267	0.509476	0.60759	D-lactate dehydrogenase
3.5.1.10	166807	153083	194688	157794	0.0813545	0.51006	0.60759	formyltetrahydrofolate deformylase
2.7.7.3	550887	548123	600266	573654	0.0404979	0.510079	0.60759	pantetheine-phosphate adenylyltransferase
4.2.1.24	571797	557861	584107	557145	-0.0397845	0.513112	0.609926	porphobilinogen synthase
1.2.1.81	51993.5	40884.6	40894.7	46261.2	-0.139551	0.513346	0.609926	sulfoacetaldehyde dehydrogenase (acylating)
4.6.1.12	510341	471679	505839	482538	-0.0447346	0.515035	0.611505	2-C-methyl-D-erythritol 2,4-cyclodiphosphate synthase
4.2.1.126	349221	329166	353046	327236	-0.0510097	0.515842	0.612035	N-acetylmuramic acid 6-phosphate etherase
5.1.1.11	101602	119034	129378	116099	0.0960788	0.517608	0.612845	phenylalanine racemase (ATP-hydrolysing)
3.6.3.39	28878.8	31716.3	37316.4	31712.2	0.129153	0.517604	0.612845	lipopolysaccharide-transporting ATPase
3.6.3.40	97652.8	96175.9	109685	77361.2	-0.114531	0.517278	0.612845	teichoic-acid-transporting ATPase
6.4.1.3	591586	575995	596368	582147	-0.040391	0.518249	0.613177	propionyl-CoA carboxylase
1.1.1.284	309752	307222	327137	339696	0.0598792	0.51871	0.613295	S-(hydroxymethyl)glutathione dehydrogenase
1.1.1.205	528750	523478	559983	566804	0.0458181	0.519988	0.613617	IMP dehydrogenase
1.16.1.9	15463.5	10122.9	15145.4	14806.2	0.176785	0.520067	0.613617	ferric-chelate reductase (NADPH)
2.6.1.17	2165.73	1781.52	2419.67	2285.83	0.20003	0.520005	0.613617	succinyldiaminopimelate transaminase
2.8.1.-	1.17811e+06	1.13841e+06	1.20873e+06	1.14276e+06	-0.0330665	0.520449	0.613642	Sulfurtransferases
2.7.7.2	764886	753969	823391	793346	0.0357836	0.521719	0.613861	FAD synthetase
3.1.1.76	2784.08	4591.9	4785.65	4170.43	0.218475	0.521472	0.613861	poly(3-hydroxyoctanoate) depolymerase
1.14.13.166	62108.1	60168.6	62643.5	55457.2	-0.106724	0.52135	0.613861	4-nitrocatechol 4-monooxygenase
6.4.1.2	1.00844e+06	994510	1.04607e+06	987389	-0.0330962	0.524856	0.617124	acetyl-CoA carboxylase
3.5.4.11	16767.7	13096.4	16062.5	11754.6	-0.162536	0.526438	0.6177	pterin deaminase
2.7.9.1	589329	559177	595218	565791	-0.0387517	0.526093	0.6177	pyruvate, phosphate dikinase
3.1.26.3	492209	468845	506940	463543	-0.0414269	0.525801	0.6177	ribonuclease III
4.2.99.20	42689.1	36453	48242.6	41244.2	0.120753	0.527391	0.618029	2-succinyl-6-hydroxy-2,4-cyclohexadiene-1-carboxylate synthase
1.13.11.-	440244	408631	459702	450064	0.0466037	0.527707	0.618029	With incorporation of two atoms of oxygen
4.4.1.25	111563	118171	125990	126949	0.0851603	0.530021	0.618603	L-cysteate sulfo-lyase
2.7.1.4	252808	230522	277397	246160	0.05935	0.531217	0.618603	fructokinase
1.12.2.1	61369.3	76869.4	80671.8	75139.2	0.11529	0.531579	0.618603	cytochrome-c3 hydrogenase
3.1.21.2	311745	296880	341697	313379	0.0506833	0.53157	0.618603	deoxyribonuclease IV
6.2.1.3	4.44617e+06	4.29061e+06	4.54844e+06	4.33127e+06	-0.0310576	0.530601	0.618603	long-chain-fatty-acid---CoA ligase
2.7.13.-	68688.5	65154.7	73861.2	75043.2	0.101369	0.530626	0.618603	Protein-histidine kinases
4.2.1.135	405.088	631.244	609.969	680.693	0.263372	0.530623	0.618603	UDP-N-acetylglucosamine 4,6-dehydratase (configuration-retaining)
6.2.1.30	880662	903603	915340	890146	-0.0373434	0.531059	0.618603	phenylacetate---CoA ligase
3.6.4.13	1.21466e+06	1.1402e+06	1.24606e+06	1.2666e+06	0.0412062	0.528953	0.618603	RNA helicase
2.4.2.10	602376	601232	654910	627495	0.0369013	0.532045	0.61872	orotate phosphoribosyltransferase
3.-.-.-	6.6196e+06	6.59681e+06	7.37071e+06	6.66424e+06	0.0304668	0.532932	0.619328	Hydrolases
1.17.99.1	63796.5	53349.7	65373.6	65763.4	0.11109	0.534085	0.620243	4-methylphenol dehydrogenase (hydroxylating)
2.7.7.38	405746	426591	457176	435942	0.0465101	0.534701	0.620535	3-deoxy-manno-octulosonate cytidylyltransferase
3.5.4.13	514919	523280	566776	541840	0.0398718	0.538607	0.620592	dCTP deaminase
2.6.1.100	88601.2	86610.3	90461.7	80711.1	-0.0900748	0.536265	0.620592	L-glutamine:2-deoxy-scyllo-inosose aminotransferase
1.3.99.33	11236.2	13766.8	13628.4	15249.2	0.155874	0.538863	0.620592	urocanate reductase
4.3.99.3	330720	382275	399608	374428	0.0620158	0.535481	0.620592	7-carboxy-7-deazaguanine synthase
6.3.4.19	381702	343674	385411	342498	-0.0508087	0.539137	0.620592	tRNAIle-lysidine synthase
1.3.98.1	84942.8	75157.3	93951.2	58477	-0.136503	0.538551	0.620592	dihydroorotate dehydrogenase (fumarate)
1.2.4.2	518921	505463	538989	497577	-0.0383787	0.539064	0.620592	oxoglutarate dehydrogenase (succinyl-transferring)
3.4.24.3	1048.24	1374.34	1346.38	1581.46	0.222022	0.538743	0.620592	microbial collagenase
1.1.2.8	539853	484732	534514	497709	-0.0437677	0.537991	0.620592	alcohol dehydrogenase (cytochrome c)
1.4.1.4	21821.8	18317	22769.3	22916.7	0.135061	0.535809	0.620592	glutamate dehydrogenase (NADP+)
1.3.99.4	220235	195369	222082	190228	-0.068236	0.536503	0.620592	3-oxosteroid 1-dehydrogenase
1.14.13.171	72175.1	67141.7	82314.4	72607.9	0.0968385	0.536646	0.620592	neopentalenolactone D synthase
2.1.1.254	49499.2	50488.5	57479.3	54305.9	0.105741	0.539863	0.62062	erythromycin 3''-O-methyltransferase
4.3.1.15	67154.2	50648.7	65084.3	46747.5	-0.135386	0.540258	0.62062	diaminopropionate ammonia-lyase
1.1.1.77	20483.8	15921.8	25275.4	17174.7	0.159462	0.54009	0.62062	lactaldehyde reductase
2.7.7.18	461080	455097	521930	458980	0.0415614	0.541432	0.620709	nicotinate-nucleotide adenylyltransferase
6.4.1.-	662460	648009	687054	643281	-0.0333619	0.541276	0.620709	Forming carbon-carbon bonds
2.3.1.1	620816	600002	630869	605422	-0.0360902	0.540973	0.620709	amino-acid N-acetyltransferase
1.1.1.127	677865	676602	745480	694958	0.033415	0.541905	0.620832	2-dehydro-3-deoxy-D-gluconate 5-dehydrogenase
1.2.1.39	20343.3	15898.2	17499.7	16580.9	-0.141448	0.542696	0.621319	phenylacetaldehyde dehydrogenase
5.3.3.3	56062	53995.8	60943.5	61711.8	0.103642	0.545343	0.621728	vinylacetyl-CoA Delta-isomerase
3.1.3.37	53713.7	66231.4	66797.2	68215	0.116122	0.544709	0.621728	sedoheptulose-bisphosphatase
4.2.1.120	56062	53995.8	60943.5	61711.8	0.103642	0.545343	0.621728	4-hydroxybutanoyl-CoA dehydratase
2.4.1.25	523316	532717	581868	483053	-0.0467471	0.543712	0.621728	4-alpha-glucanotransferase
2.1.3.9	49332.9	47326.6	53949.6	53988.3	0.106209	0.545982	0.621728	N-acetylornithine carbamoyltransferase
2.6.1.92	430.414	591.803	526.328	737.302	0.258632	0.545831	0.621728	UDP-4-amino-4,6-dideoxy-N-acetyl-beta-L-altrosamine transaminase
2.4.1.187	184025	175769	198918	157046	-0.0751478	0.543821	0.621728	N-acetylglucosaminyldiphosphoundecaprenol N-acetyl-beta-D-mannosaminyltransferase
4.3.3.-	185546	165243	204457	178058	0.0685944	0.545774	0.621728	Amine-lyases
1.13.12.-	252626	230783	247065	235090	-0.057762	0.546737	0.622087	With incorporation of one atom of oxygen (internal monooxygenases or internal mixed function oxidases)
1.2.-.-	1.20392e+06	1.21664e+06	1.27104e+06	1.18974e+06	-0.0315789	0.54703	0.622087	Acting on the aldehyde or oxo group of donors
4.1.2.50	650057	697370	719821	643221	-0.040577	0.548877	0.623769	6-carboxytetrahydropterin synthase
2.5.1.90	393213	402583	418672	384160	-0.0433403	0.550358	0.624198	all-trans-octaprenyl-diphosphate synthase
3.4.16.4	1.2234e+06	1.16135e+06	1.23717e+06	1.18453e+06	-0.0319824	0.550144	0.624198	serine-type D-Ala-D-Ala carboxypeptidase
3.2.2.-	1.17492e+06	1.09885e+06	1.212e+06	1.09899e+06	-0.0321704	0.550287	0.624198	Hydrolyzing N-glycosyl compounds
2.1.1.188	8247.25	5291.94	8446.86	7424.56	0.176087	0.551536	0.6247	23S rRNA (guanine748-N1)-methyltransferase
1.14.19.-	288664	267947	313860	285634	0.0516524	0.551171	0.6247	With oxidation of a pair of donors resulting in the reduction of molecular oxygen to two molecules of water
5.3.2.6	33943.3	24545.7	36201.1	16998.9	-0.208065	0.55585	0.626843	2-hydroxymuconate tautomerase
3.5.5.1	108591	108827	122984	115346	0.0772595	0.554442	0.626843	nitrilase
5.4.99.22	249078	243273	267381	263225	0.0543297	0.556012	0.626843	23S rRNA pseudouridine2605 synthase
2.1.1.174	10337.8	9467.18	12658.7	10101.7	0.141666	0.555903	0.626843	23S rRNA (guanine1835-N2)-methyltransferase
1.17.1.8	617112	581032	633987	581179	-0.0349876	0.555786	0.626843	4-hydroxy-tetrahydrodipicolinate reductase
1.8.2.4	499.419	392.641	636.235	459.366	0.2353	0.554476	0.626843	dimethyl sulfide:cytochrome c2 reductase
2.6.1.36	78539.6	71895.9	73138.8	73070.1	-0.0937604	0.55576	0.626843	L-lysine 6-transaminase
1.15.1.2	8039.82	14624.7	13826.5	13246.6	0.196806	0.556839	0.627108	superoxide reductase
1.3.99.1	2.12017e+06	2.22224e+06	2.24975e+06	2.15522e+06	-0.0343767	0.556987	0.627108	succinate dehydrogenase
5.99.1.3	2.02579e+06	2.03983e+06	2.18351e+06	2.13274e+06	0.032193	0.559563	0.629196	DNA topoisomerase (ATP-hydrolysing)
3.1.3.10	1268.98	1482.71	1499.52	989.205	-0.21125	0.56002	0.629196	glucose-1-phosphatase
2.4.1.284	55638.4	51491.9	65295.4	54374.2	0.101763	0.560734	0.629196	2-deoxystreptamine glucosyltransferase
1.5.1.11	1184.74	1383.22	1556.63	710.266	-0.255839	0.561435	0.629196	D-octopine dehydrogenase
1.5.1.16	1184.74	1383.22	1556.63	710.266	-0.255839	0.561435	0.629196	D-lysopine dehydrogenase
4.4.1.-	276.563	243.882	221.029	432.562	0.293452	0.561101	0.629196	Carbon-sulfur lyases
3.2.1.97	1468.08	1259.99	1828.65	1421.67	0.193847	0.560324	0.629196	endo-alpha-N-acetylgalactosaminidase
3.4.22.-	231303	229148	259847	236874	0.0534475	0.562095	0.62952	Cysteine endopeptidases
1.7.2.5	201293	184532	232860	188233	0.0675073	0.562744	0.629832	nitric oxide reductase (cytochrome c)
2.4.1.11	828520	784950	873102	766478	-0.0334672	0.56411	0.630115	glycogen(starch) synthase
1.1.1.327	189879	225064	197923	209524	-0.0795298	0.563385	0.630115	5-exo-hydroxycamphor dehydrogenase
2.1.1.239	5080.6	4218.62	5054.54	3585.54	-0.167498	0.563787	0.630115	L-olivosyl-oleandolide 3-O-methyltransferase
1.5.8.2	66677.2	56288.9	71826.7	45454.1	-0.133088	0.565751	0.631117	trimethylamine dehydrogenase
2.7.1.26	569676	536026	579870	540648	-0.0356481	0.565469	0.631117	riboflavin kinase
5.4.99.18	496556	474857	499673	482323	-0.0383699	0.566658	0.631713	5-(carboxyamino)imidazole ribonucleotide mutase
2.1.1.33	330219	318662	349974	303224	-0.0475936	0.568284	0.633017	tRNA (guanine46-N7)-methyltransferase
2.3.-.-	271504	255876	288862	278184	0.0506809	0.568573	0.633017	Acyltransferases
1.5.1.2	483270	450534	501564	442937	-0.0398851	0.569781	0.633946	pyrroline-5-carboxylate reductase
2.7.1.148	416478	385761	436375	372713	-0.0449471	0.570984	0.634869	4-(cytidine 5'-diphospho)-2-C-methyl-D-erythritol kinase
1.2.1.2	1.12296e+06	1.14459e+06	1.20962e+06	1.09897e+06	-0.0303991	0.572038	0.635463	formate dehydrogenase
4.3.1.12	337419	397801	370859	361604	-0.0609473	0.572267	0.635463	ornithine cyclodeaminase
1.2.1.79	968721	930989	1.01273e+06	921883	-0.0294526	0.573225	0.635633	succinate-semialdehyde dehydrogenase (NADP+)
5.4.2.8	485899	459546	472984	478998	-0.0425967	0.573543	0.635633	phosphomannomutase
2.1.1.35	1007.28	662.827	729.714	1317.63	0.260619	0.574462	0.635822	tRNA (uracil54-C5)-methyltransferase
1.13.11.66	19672.8	14937.8	19169.4	20177.6	0.135472	0.574117	0.635822	hydroquinone 1,2-dioxygenase
3.2.1.180	39564.2	40304	45865.3	43184.6	0.101738	0.575416	0.636057	unsaturated chondroitin disaccharide hydrolase
2.7.8.5	785841	777135	839562	751731	-0.0305325	0.577103	0.636057	CDP-diacylglycerol---glycerol-3-phosphate 3-phosphatidyltransferase
2.7.2.-	34162.9	24064.6	29810.7	36568.2	0.144437	0.576945	0.636057	Phosphotransferases with a carboxy group as acceptor
5.1.3.11	41599.1	41921.1	58442	37247.2	0.130094	0.575485	0.636057	cellobiose epimerase
2.5.1.30	125711	93819.1	108035	104799	-0.0964144	0.575865	0.636057	heptaprenyl diphosphate synthase
1.3.99.5	19528.6	14096.3	18662.7	12889.4	-0.152846	0.577297	0.636057	3-oxo-5alpha-steroid 4-dehydrogenase (acceptor)
3.4.11.5	703857	679192	732256	675097	-0.0302585	0.576269	0.636057	prolyl aminopeptidase
1.1.1.267	515808	483359	525428	486735	-0.0363561	0.577935	0.636072	1-deoxy-D-xylulose-5-phosphate reductoisomerase
4.2.1.75	339191	322641	374416	334863	0.0437566	0.57806	0.636072	uroporphyrinogen-III synthase
3.6.3.14	1.477e+06	1.52133e+06	1.64302e+06	1.53856e+06	0.030072	0.579668	0.636386	H+-transporting two-sector ATPase
2.4.2.18	529854	510167	529728	521964	-0.0373748	0.579533	0.636386	anthranilate phosphoribosyltransferase
1.3.1.31	5604.03	6440.61	7091.68	6725.81	0.142016	0.579682	0.636386	2-enoate reductase
3.4.19.-	38202.3	40495.6	42703.2	45129.1	0.106105	0.580129	0.636386	Omega peptidases
1.15.1.1	1.39815e+06	1.46935e+06	1.48605e+06	1.42515e+06	-0.0331846	0.58022	0.636386	superoxide dismutase
1.5.3.1	1.3991e+06	1.36135e+06	1.54396e+06	1.38327e+06	0.0283578	0.580828	0.636409	sarcosine oxidase
2.8.1.7	2.11421e+06	2.11119e+06	2.29357e+06	2.18198e+06	0.0281857	0.58099	0.636409	cysteine desulfurase
2.7.7.49	365120	447466	471208	328549	-0.0883137	0.583655	0.636748	RNA-directed DNA polymerase
1.5.8.1	12839.1	9694.15	12579.9	8571.96	-0.153037	0.584997	0.636748	dimethylamine dehydrogenase
2.3.1.30	453420	451017	491821	424295	-0.0390352	0.58764	0.636748	serine O-acetyltransferase
1.21.3.1	332054	303622	350702	287493	-0.0525597	0.58805	0.636748	isopenicillin-N synthase
2.7.8.12	1044.7	778.235	1086.23	1076.47	0.194858	0.587227	0.636748	CDP-glycerol glycerophosphotransferase
4.2.99.18	745964	785356	826131	803412	0.0350683	0.58795	0.636748	DNA-(apurinic or apyrimidinic site) lyase
6.4.1.8	97575.4	115354	115100	93765.1	-0.0884696	0.586531	0.636748	acetophenone carboxylase
3.4.21.96	247.012	261.708	341.564	277.025	0.222463	0.58696	0.636748	lactocepin
1.16.3.-	46437.3	29492.6	48393.5	20332.9	-0.21678	0.587103	0.636748	With oxygen as acceptor
2.6.1.1	1.60462e+06	1.62628e+06	1.73089e+06	1.69631e+06	0.0310178	0.584972	0.636748	aspartate transaminase
6.1.1.1	579215	570333	630490	590348	0.0316809	0.587444	0.636748	tyrosine---tRNA ligase
3.4.17.13	5075.47	4014	5542.72	4926.76	0.149346	0.582272	0.636748	muramoyltetrapeptide carboxypeptidase
2.4.1.227	495315	468797	526730	499563	0.035755	0.585737	0.636748	undecaprenyldiphospho-muramoylpentapeptide beta-N-acetylglucosaminyltransferase
3.2.1.54	15901.9	21112.5	25497.9	17475.7	0.148851	0.582578	0.636748	cyclomaltodextrinase
1.7.3.3	96448.1	87100	103985	97124.9	0.0773827	0.586905	0.636748	factor-independent urate hydroxylase
3.7.1.8	70209.8	68551.3	76757	76087.4	0.0860328	0.584658	0.636748	2,6-dioxo-6-phenylhexa-3-enoate hydrolase
1.4.99.-	33208.5	36055.3	38197.4	39200.4	0.106835	0.584655	0.636748	With other acceptors
1.4.99.5	261954	257548	283511	238169	-0.0521641	0.586795	0.636748	glycine dehydrogenase (cyanide-forming)
1.1.1.44	152890	147642	168717	156870	0.060369	0.589008	0.636864	phosphogluconate dehydrogenase (NADP+-dependent, decarboxylating)
3.6.1.17	62335.5	60640.7	68793	50849.6	-0.101372	0.589459	0.636864	bis(5'-nucleosyl)-tetraphosphatase (asymmetrical)
1.14.14.10	8765.77	7538.51	8752.56	6675.09	-0.139524	0.589067	0.636864	nitrilotriacetate monooxygenase
6.3.5.5	1.298e+06	1.29476e+06	1.34177e+06	1.29676e+06	-0.0290879	0.589657	0.636864	carbamoyl-phosphate synthase (glutamine-hydrolysing)
2.3.1.203	36949.2	43089.9	44664.2	44769.1	0.105458	0.591696	0.63866	UDP-N-acetylbacillosamine N-acetyltransferase
2.1.1.190	69289	70875	76187.1	78112.9	0.0857551	0.594332	0.639066	23S rRNA (uracil1939-C5)-methyltransferase
1.3.1.39	193135	204280	209678	220568	0.0620902	0.594024	0.639066	enoyl-[acyl-carrier-protein] reductase (NADPH, Re-specific)
4.2.1.100	34703.4	39161.8	46600.6	36497.7	0.108563	0.593478	0.639066	cyclohexa-1,5-dienecarbonyl-CoA hydratase
2.4.2.9	732536	719389	764350	778629	0.0350552	0.598523	0.639452	uracil phosphoribosyltransferase
1.4.1.13	1.01452e+06	978247	1.05576e+06	976150	-0.0272393	0.596462	0.639452	glutamate synthase (NADPH)
1.1.1.215	856.114	1169.18	1120.91	1282.62	0.195239	0.600055	0.639452	gluconate 2-dehydrogenase
1.2.1.19	241712	198577	239798	236905	0.0626139	0.601732	0.639452	aminobutyraldehyde dehydrogenase
1.13.12.4	168661	141852	163563	144460	-0.0670395	0.602482	0.639452	lactate 2-monooxygenase
5.3.2.8	42218.9	31061.4	39344.1	30900.2	-0.118652	0.602599	0.639452	4-oxalomesaconate tautomerase
2.7.2.3	644628	620524	659520	627333	-0.0299419	0.599645	0.639452	phosphoglycerate kinase
3.6.1.15	44707.5	48071.9	52762.9	37014.1	-0.111516	0.599106	0.639452	nucleoside-triphosphate phosphatase
1.1.1.268	82492.4	83991.5	91657.4	90653	0.0771575	0.602258	0.639452	2-(R)-hydroxypropyl-CoM dehydrogenase
6.6.1.1	157896	180218	193230	174728	0.0646335	0.602484	0.639452	magnesium chelatase
3.6.3.5	47436.6	33813.8	53207.1	39085	0.124597	0.600278	0.639452	Zn2+-exporting ATPase
1.13.11.27	249860	213048	254076	245353	0.0565568	0.599646	0.639452	4-hydroxyphenylpyruvate dioxygenase
1.13.11.20	151628	154985	173272	130570	-0.0747077	0.595729	0.639452	cysteine dioxygenase
1.14.11.28	1529.79	1354.56	1372.19	2035.42	0.19853	0.59522	0.639452	proline 3-hydroxylase
2.9.1.1	341364	322010	367075	341793	0.0407836	0.601533	0.639452	L-seryl-tRNASec selenium transferase
3.1.21.-	619754	622160	684590	633018	0.0297066	0.599478	0.639452	Endodeoxyribonucleases producing 5'-phosphomonoesters
1.3.-.-	803490	807220	862602	778838	-0.02907	0.596005	0.639452	Acting on the CH-CH group of donors
2.6.-.-	923663	865529	946171	876074	-0.0286046	0.600043	0.639452	Transferring nitrogenous groups
3.1.4.16	28302.6	35883.9	34142.1	38219.7	0.120731	0.598183	0.639452	2',3'-cyclic-nucleotide 2'-phosphodiesterase
1.5.99.11	972261	996366	989623	1.00411e+06	-0.0348967	0.601414	0.639452	5,10-methylenetetrahydromethanopterin reductase
2.5.1.61	538325	501490	543919	510567	-0.0343589	0.597802	0.639452	hydroxymethylbilane synthase
6.1.1.18	422755	430241	434135	427934	-0.0386801	0.603279	0.639773	glutamine---tRNA ligase
4.2.1.108	128708	122439	130138	119341	-0.0650325	0.603972	0.640108	ectoine synthase
1.13.11.15	37411.4	33992.6	37055.8	32269.3	-0.0991223	0.60463	0.640407	3,4-dihydroxyphenylacetate 2,3-dioxygenase
1.97.1.4	93165.2	71367.3	86752.1	95230	0.0970024	0.605853	0.64068	[formate-C-acetyltransferase]-activating enzyme
5.4.99.23	303358	289326	318517	315767	0.0446476	0.607526	0.64068	23S rRNA pseudouridine1911/1915/1917 synthase
5.3.1.24	493999	501225	530518	480358	-0.0338275	0.606548	0.64068	phosphoribosylanthranilate isomerase
1.1.1.48	7905.65	6273.76	7178.05	6250.38	-0.13394	0.606946	0.64068	D-galactose 1-dehydrogenase
6.3.5.1	607547	591497	629465	590801	-0.0296467	0.607376	0.64068	NAD+ synthase (glutamine-hydrolysing)
4.3.1.14	530.927	572.954	592.376	411.981	-0.201003	0.60753	0.64068	3-aminobutyryl-CoA ammonia-lyase
5.4.3.-	51263.7	53839.2	62015.6	54356.9	0.0893879	0.605991	0.64068	Transferring amino groups
1.6.99.5	9.52256e+06	9.59764e+06	1.04676e+07	9.74983e+06	0.0250245	0.608411	0.64071	NADH dehydrogenase (quinone)
2.3.1.74	83526	70290.4	85287.8	65026.6	-0.0928119	0.608876	0.64071	naringenin-chalcone synthase
2.3.1.-	1.25879e+07	1.21616e+07	1.35151e+07	1.17553e+07	-0.027015	0.608705	0.64071	Transferring groups other than amino-acyl groups
2.7.7.73	121804	132247	154849	123686	0.0722501	0.609068	0.64071	sulfur carrier protein ThiS adenylyltransferase
2.7.1.53	3260.5	2797.96	3851.18	3131.9	0.147073	0.611758	0.641958	L-xylulokinase
1.1.1.107	285109	283567	320753	288297	0.0425767	0.61368	0.641958	pyridoxal 4-dehydrogenase
5.3.3.1	381668	338727	435223	343188	0.0526368	0.613219	0.641958	steroid Delta-isomerase
2.1.1.79	330839	321773	352885	306750	-0.0416924	0.613583	0.641958	cyclopropane-fatty-acyl-phospholipid synthase
5.3.1.26	5577.46	4287.4	4893.34	6418.07	0.153998	0.613014	0.641958	galactose-6-phosphate isomerase
3.4.21.88	664766	662540	700588	652322	-0.0278239	0.612696	0.641958	repressor LexA
3.1.8.1	8129.01	6726.37	8274.73	8547.84	0.128653	0.61283	0.641958	aryldialkylphosphatase
3.2.1.135	77160.6	88133.9	106819	77533.2	0.0937965	0.612776	0.641958	neopullulanase
2.3.1.9	1.01047e+06	976277	1.01563e+06	1.00461e+06	-0.0292759	0.61594	0.641958	acetyl-CoA C-acetyltransferase
1.8.4.8	416478	378725	435598	411882	0.0377015	0.615861	0.641958	phosphoadenylyl-sulfate reductase (thioredoxin)
1.14.19.3	47003.1	59967.6	67640	52584.6	0.105874	0.615611	0.641958	acyl-CoA 6-desaturase
5.1.1.8	93405.6	90880.5	110029	91750	0.0725024	0.6163	0.641958	4-hydroxyproline epimerase
1.14.13.149	162234	158252	170241	175964	0.0591414	0.616304	0.641958	phenylacetyl-CoA 1,2-epoxidase
3.4.21.66	68134	85875.5	85053.7	85652.7	0.0933187	0.612385	0.641958	thermitase
2.5.1.96	800.584	581.234	948.823	696.262	0.191941	0.618789	0.643145	4,4'-diapophytoene synthase
2.7.1.20	107394	96640.7	106059	116666	0.0766936	0.618646	0.643145	adenosine kinase
1.1.1.264	21891.8	15047.6	23117.5	18850.6	0.128166	0.61906	0.643145	L-idonate 5-dehydrogenase
1.5.1.30	5596.62	4333.74	5675.8	3651.59	-0.153936	0.619338	0.643145	flavin reductase (NADPH)
5.3.1.28	508773	501927	600335	483573	0.0414654	0.618294	0.643145	D-sedoheptulose 7-phosphate isomerase
2.7.1.178	1908.68	3064.58	2162.78	2395.49	-0.180514	0.621685	0.645189	2-dehydro-3-deoxyglucono/galactono-kinase
2.7.8.6	35235.8	37651.5	41098.6	39636.6	0.0925403	0.623798	0.645629	undecaprenyl-phosphate galactose phosphotransferase
3.6.3.29	357737	314930	359552	318554	-0.0441109	0.622984	0.645629	molybdate-transporting ATPase
3.5.3.23	17060.8	26810	23263.3	18334	-0.140791	0.624391	0.645629	N-succinylarginine dihydrolase
2.3.1.197	164697	190254	199730	185405	0.0609906	0.624276	0.645629	dTDP-3-amino-3,6-dideoxy-alpha-D-galactopyranose 3-N-acetyltransferase
2.3.1.4	49625.8	44391.9	56554.3	47524.5	0.0892847	0.623257	0.645629	glucosamine-phosphate N-acetyltransferase
2.3.1.89	13546.2	14030.6	15106.3	15792.2	0.111621	0.623695	0.645629	tetrahydrodipicolinate N-acetyltransferase
4.2.1.7	63259.2	69622.1	85021.8	62856.3	0.0914856	0.625305	0.64618	altronate dehydratase
1.1.1.67	16756.3	19111.5	20492.3	13961.1	-0.123389	0.627873	0.648439	mannitol 2-dehydrogenase
2.4.1.-	3.87145e+06	3.80786e+06	4.18984e+06	3.65854e+06	-0.0256869	0.628505	0.648698	Hexosyltransferases
3.5.4.27	120694	101986	125345	116976	0.0680532	0.630319	0.649779	methenyltetrahydromethanopterin cyclohydrolase
2.7.13.3	2.18761e+07	2.23048e+07	2.39358e+07	2.1234e+07	-0.0250286	0.630052	0.649779	histidine kinase
5.4.99.1	342564	374714	376932	391947	0.0471787	0.63242	0.651529	methylaspartate mutase
2.8.3.8	318868	241784	311063	244711	-0.070427	0.632783	0.651529	acetate CoA-transferase
1.14.99.-	40352	47820.6	50292.6	47440.1	0.0919922	0.633882	0.651974	Miscellaneous
1.1.3.41	66829	59565.7	72851.6	50626.9	-0.0963596	0.634282	0.651974	alditol oxidase
4.1.2.40	96928.8	90866	107728	77399.6	-0.0828308	0.634368	0.651974	tagatose-bisphosphate aldolase
1.12.1.5	22236.9	10906.6	20542.4	9539.38	-0.208345	0.635227	0.652463	hydrogen dehydrogenase [NAD(P)+]
6.5.-.-	37684.2	17654.4	24111.8	26628.2	-0.169405	0.636587	0.653464	Forming phosphoric ester bonds
2.8.2.-	115640	97124.6	130069	103146	0.0739295	0.637427	0.653931	Sulfotransferases
3.4.17.19	274261	224831	264934	234527	-0.0540719	0.638376	0.654509	carboxypeptidase Taq
2.4.99.-	609351	607318	683174	606827	0.0277035	0.638857	0.654607	Transferring other glycosyl groups
1.14.15.12	234875	263167	269605	231069	-0.0511599	0.639881	0.655051	pimeloyl-[acyl-carrier protein] synthase
2.7.1.60	51838.4	42069.9	53763.7	37439.6	-0.10397	0.640063	0.655051	N-acylmannosamine kinase
4.2.1.45	99969.5	95809.3	112495	80902.6	-0.0800131	0.640642	0.65525	CDP-glucose 4,6-dehydratase
2.1.1.210	62455.4	60709.8	63129.5	58241.4	-0.0766035	0.64156	0.655518	demethylspheroidene O-methyltransferase
3.6.4.12	4.89952e+06	4.6625e+06	5.08863e+06	4.69168e+06	-0.0227038	0.641677	0.655518	DNA helicase
2.7.8.11	78635.7	79164.8	85264.6	86707.7	0.0711137	0.642526	0.655991	CDP-diacylglycerol---inositol 3-phosphatidyltransferase
2.7.1.36	282214	299618	346278	280615	0.0477287	0.643756	0.656063	mevalonate kinase
3.8.1.8	1143.08	984.774	965.18	1007.78	-0.160013	0.643734	0.656063	atrazine chlorohydrolase
1.5.99.8	500828	467705	493915	488053	-0.0332538	0.643209	0.656063	proline dehydrogenase
3.5.3.4	83018	78996.4	88301.7	87999.5	0.0688726	0.64565	0.657005	allantoicase
3.7.1.18	81053.7	94300.5	106358	86465.6	0.0764264	0.645841	0.657005	6-oxocamphor hydrolase
5.4.1.-	22714.1	18603.8	25144	14289.2	-0.134801	0.645599	0.657005	Transferring acyl groups
3.2.1.93	2086.55	1582.2	2047.83	2167.67	0.151057	0.646565	0.657348	alpha,alpha-phosphotrehalase
3.5.1.83	44884.5	45249.7	47459.3	51666	0.0861262	0.647357	0.657366	N-acyl-D-aspartate deacylase
5.5.1.1	181279	182164	191442	173967	-0.0483708	0.647224	0.657366	muconate cycloisomerase
2.6.99.2	357200	358712	381238	380897	0.0368203	0.648803	0.657704	pyridoxine 5'-phosphate synthase
2.6.1.62	286002	278460	297857	273306	-0.0385773	0.648903	0.657704	adenosylmethionine---8-amino-7-oxononanoate transaminase
3.1.27.6	6640.08	5507.41	10008.9	4430.74	0.175525	0.64924	0.657704	Enterobacter ribonuclease
5.3.2.3	35884.4	26838.8	37929.2	22043.5	-0.130768	0.649117	0.657704	TDP-4-oxo-6-deoxy-alpha-D-glucose-3,4-oxoisomerase (dTDP-3-dehydro-6-deoxy-alpha-D-galactopyranose-forming)
3.6.3.15	1561.57	1284.76	1579.68	1692.46	0.150913	0.650224	0.657916	Na+-transporting two-sector ATPase
1.12.98.4	146164	82224.2	140453	74604	-0.152859	0.650158	0.657916	sulfhydrogenase
3.1.11.3	44473.5	19392.2	28147.1	30385.2	-0.170166	0.651058	0.658294	exodeoxyribonuclease (lambda-induced)
1.7.1.13	412242	431884	433523	422349	-0.0345936	0.651761	0.658294	preQ1 synthase
2.7.1.15	300022	271176	341774	273241	0.0477555	0.651733	0.658294	ribokinase
1.4.3.16	400124	381250	424258	405358	0.0321679	0.653097	0.65886	L-aspartate oxidase
1.14.11.1	37893.7	31833.8	42075.5	25170	-0.118571	0.652726	0.65886	gamma-butyrobetaine dioxygenase
4.2.1.113	227248	212365	240765	202171	-0.0469077	0.654054	0.659433	o-succinylbenzoate synthase
2.7.7.66	6042.15	5786.02	7699.98	3364.2	-0.171826	0.657225	0.661703	malonate decarboxylase holo-[acyl-carrier protein] synthase
6.5.1.-	505259	574041	567361	586595	0.0429561	0.657346	0.661703	Forming phosphoric ester bonds
3.6.5.-	605890	607895	648189	636215	0.0276439	0.65794	0.66178	Acting on GTP; involved in cellular and subcellular movement
2.5.1.74	127084	108321	119819	114263	-0.0614832	0.660581	0.664042	1,4-dihydroxy-2-naphthoate polyprenyltransferase
3.5.1.91	489830	497273	514154	490662	-0.0291879	0.661717	0.66479	N-substituted formamide deformylase
3.5.4.3	283346	286890	300798	276846	-0.0372348	0.6634	0.665694	guanine deaminase
1.12.99.6	326875	302304	374957	253435	-0.0655856	0.663128	0.665694	hydrogenase (acceptor)
3.2.2.26	37517.8	29470.2	34581.8	39447	0.0966328	0.6649	0.666805	futalosine hydrolase
1.2.7.-	230532	176802	242878	199486	0.0623252	0.668503	0.666998	With an iron-sulfur protein as acceptor
1.3.1.98	534256	522664	569042	549149	0.0270939	0.66881	0.666998	UDP-N-acetylmuramate dehydrogenase
3.6.1.27	709449	668086	744416	663680	-0.0244776	0.671761	0.666998	undecaprenyl-diphosphate phosphatase
3.5.1.94	99901.9	89254.8	106987	80817.3	-0.0707302	0.669467	0.666998	gamma-glutamyl-gamma-aminobutyrate hydrolase
4.2.1.30	29644.8	22074.4	28080	29202.6	0.0976874	0.671734	0.666998	glycerol dehydratase
1.2.1.22	35888	28633	36767.1	34354.7	0.0871609	0.671665	0.666998	lactaldehyde dehydrogenase
3.2.1.26	16986.1	16238.3	24580.8	13481	0.126411	0.671028	0.666998	beta-fructofuranosidase
3.5.2.2	44649.2	43966.7	50403	46630	0.0754406	0.669752	0.666998	dihydropyrimidinase
3.5.5.8	92625.7	91905.7	108399	92044.7	0.0613539	0.668057	0.666998	thiocyanate hydrolase
2.3.1.94	22840.8	25378.4	30367.7	23376.1	0.0947732	0.665759	0.666998	6-deoxyerythronolide-B synthase
2.2.1.8	197.422	478.003	753.79	154.195	0.329256	0.667536	0.666998	fluorothreonine transaldolase
3.1.1.1	1.26314e+06	1.17901e+06	1.30956e+06	1.2677e+06	0.0239737	0.671771	0.666998	carboxylesterase
1.18.1.7	41788.1	39991.4	49590.6	40437	0.0798337	0.669466	0.666998	ferredoxin---NAD(P)+ reductase (naphthalene dioxygenase ferredoxin-specific)
3.2.1.136	49190.5	39596	60329.5	39257.5	0.10197	0.668546	0.666998	glucuronoarabinoxylan endo-1,4-beta-xylanase
1.12.99.-	32042.5	20667.5	34251.7	15066.5	-0.167957	0.666944	0.666998	With other acceptors
4.2.3.4	535902	509084	566254	539399	0.0270927	0.669078	0.666998	3-dehydroquinate synthase
4.3.1.9	10553.2	10915.6	7813.78	12313.4	-0.134122	0.670029	0.666998	glucosaminate ammonia-lyase
2.7.4.6	546342	552199	591812	570454	0.0268288	0.673166	0.667992	nucleoside-diphosphate kinase
1.14.13.29	187703	176238	197180	192420	0.0447569	0.67511	0.669158	4-nitrophenol 2-monooxygenase
4.3.2.2	632051	626437	649994	633868	-0.0252223	0.675129	0.669158	adenylosuccinate lyase
6.1.1.16	614239	607440	649569	599526	-0.0235539	0.678669	0.671441	cysteine---tRNA ligase
3.5.2.18	105205	119119	122990	100941	-0.0626141	0.679014	0.671441	enamidase
6.3.3.3	210261	202486	224374	192623	-0.0426244	0.679812	0.671689	dethiobiotin synthase
6.1.1.20	1.16491e+06	1.12048e+06	1.20743e+06	1.13214e+06	-0.0210814	0.680394	0.671689	phenylalanine---tRNA ligase
3.1.1.29	950639	861525	943115	904788	-0.0255356	0.680451	0.671689	aminoacyl-tRNA hydrolase
2.7.1.100	40564.2	41155.2	49341	40450.4	0.0767354	0.681514	0.672346	S-methyl-5-thioribose kinase
4.1.1.48	503977	491766	526605	489662	-0.0258095	0.683248	0.673274	indole-3-glycerol-phosphate synthase
2.4.1.21	491068	499711	565238	486905	0.02891	0.682968	0.673274	starch synthase (glycosyl-transferring)
4.1.1.20	622269	607902	649443	608310	-0.0230557	0.68399	0.673462	diaminopimelate decarboxylase
6.1.1.10	665837	657710	709250	687489	0.0234889	0.684232	0.673462	methionine---tRNA ligase
3.1.-.-	9.37264e+06	9.78478e+06	1.06324e+07	8.95372e+06	-0.0267217	0.685389	0.673815	Acting on ester bonds
2.7.7.56	548005	532068	553297	546783	-0.0269838	0.685252	0.673815	tRNA nucleotidyltransferase
3.1.1.85	1.12968e+06	1.04883e+06	1.19899e+06	1.09936e+06	0.0220533	0.685781	0.673815	pimelyl-[acyl-carrier protein] methyl ester esterase
1.1.1.4	127433	112862	130783	127940	0.0536455	0.686815	0.674441	(R,R)-butanediol dehydrogenase
1.2.1.3	1.43351e+06	1.32893e+06	1.56901e+06	1.35346e+06	0.0243138	0.689235	0.676169	aldehyde dehydrogenase (NAD+)
1.1.3.43	394748	428049	436351	400444	-0.0321957	0.689848	0.676169	paromamine 6'-oxidase
2.7.6.3	460372	440143	479997	438748	-0.0266405	0.690015	0.676169	2-amino-4-hydroxy-6-hydroxymethyldihydropteridine diphosphokinase
1.17.7.1	549942	525845	560512	537462	-0.0247395	0.695596	0.680366	(E)-4-hydroxy-3-methylbut-2-enyl-diphosphate synthase (ferredoxin)
5.4.2.10	768593	754254	835900	769720	0.0207885	0.695719	0.680366	phosphoglucosamine mutase
3.4.22.50	11678.9	11140.1	15210.2	10369.7	0.10099	0.695776	0.680366	V-cath endopeptidase
3.4.19.5	108149	102958	125333	103038	0.0548717	0.696054	0.680366	beta-aspartyl-peptidase
2.6.1.19	457637	441199	484396	433275	-0.0263257	0.697072	0.680968	4-aminobutyrate---2-oxoglutarate transaminase
2.3.1.82	277330	254108	296478	269303	0.0349771	0.697633	0.681124	aminoglycoside 6'-N-acetyltransferase
2.7.7.12	385120	410284	447031	398226	0.0304747	0.698815	0.681887	UDP-glucose---hexose-1-phosphate uridylyltransferase
4.1.1.64	107739	99039	120765	102546	0.0536598	0.700546	0.682298	2,2-dialkylglycine decarboxylase (pyruvate)
3.6.3.20	551310	531910	562677	543136	-0.0242981	0.701246	0.682298	glycerol-3-phosphate-transporting ATPase
1.2.4.4	788946	757617	784351	792383	-0.0248655	0.700705	0.682298	3-methyl-2-oxobutanoate dehydrogenase (2-methylpropanoyl-transferring)
4.2.1.3	638854	639775	682554	666219	0.0229646	0.701228	0.682298	aconitate hydratase
1.8.4.11	1.04959e+06	1.04835e+06	1.1427e+06	1.06746e+06	0.0198639	0.700881	0.682298	peptide-methionine (S)-S-oxide reductase
3.5.3.22	79551.3	75501.8	80479.7	74271.9	-0.0580216	0.702305	0.682937	proclavaminate amidinohydrolase
6.1.1.14	884383	880901	929940	878289	-0.0203004	0.704081	0.68349	glycine---tRNA ligase
1.11.1.21	351361	350369	369942	344765	-0.0289318	0.703289	0.68349	catalase-peroxidase
2.1.1.148	179191	151953	177335	155690	-0.0474933	0.703698	0.68349	thymidylate synthase (FAD)
2.4.2.47	34378.7	20261.6	29567.9	23119.9	-0.108396	0.708342	0.687211	arabinofuranan 3-O-arabinosyltransferase
1.4.4.2	851604	867571	935827	876385	0.0206205	0.708724	0.687211	glycine dehydrogenase (aminomethyl-transferring)
2.5.1.78	505294	493083	524208	495905	-0.0236805	0.710601	0.68791	6,7-dimethyl-8-ribityllumazine synthase
1.14.12.12	10463.8	10139.2	12340.5	10420.6	0.0857904	0.713728	0.68791	naphthalene 1,2-dioxygenase
2.5.1.99	143511	147804	165132	128263	-0.0505582	0.711833	0.68791	all-trans-phytoene synthase
4.1.1.65	602733	634944	657373	608365	-0.0236993	0.711886	0.68791	phosphatidylserine decarboxylase
4.1.3.-	534511	528896	569201	553106	0.0236651	0.712616	0.68791	Oxo-acid-lyases
6.1.1.6	605991	588371	633257	589610	-0.0211355	0.713129	0.68791	lysine---tRNA ligase
3.5.1.47	1102.56	823.085	1319.64	892.565	0.138552	0.713901	0.68791	N-acetyldiaminopimelate deacetylase
3.5.1.38	13109.8	13563.9	15441.5	13929.5	0.0823458	0.712715	0.68791	glutamin-(asparagin-)ase
2.7.7.72	551450	524303	579078	521535	-0.0229681	0.713717	0.68791	CCA tRNA nucleotidyltransferase
2.4.1.213	606.833	509.436	418.61	613.415	-0.154343	0.712883	0.68791	glucosylglycerol-phosphate synthase
1.11.1.19	3629.49	2191.57	2800.09	2711.9	-0.128716	0.711023	0.68791	dye decolorizing peroxidase
1.4.1.23	4742.63	3680.11	4614.17	4751.91	0.102721	0.715498	0.689057	valine dehydrogenase (NAD+)
2.7.7.13	695013	728448	777923	679531	-0.0235977	0.717067	0.689407	mannose-1-phosphate guanylyltransferase
2.1.1.220	97076.5	98769.8	96269.7	99554.2	-0.0527382	0.717883	0.689407	tRNA (adenine58-N1)-methyltransferase
2.1.2.2	523805	523894	566631	538925	0.0227345	0.718312	0.689407	phosphoribosylglycinamide formyltransferase
2.7.1.144	55982.5	38415.6	56570.2	35539.7	-0.0986289	0.71812	0.689407	tagatose-6-phosphate kinase
2.1.1.184	2172.72	2113.94	2161.18	1969.21	-0.109613	0.718704	0.689407	23S rRNA (adenine2085-N6)-dimethyltransferase
2.7.9.3	377747	368135	406383	382527	0.0260295	0.718622	0.689407	selenide, water dikinase
4.2.3.5	581987	563615	589030	580744	-0.0233836	0.717056	0.689407	chorismate synthase
4.1.1.68	16251.6	11531.7	15338.4	11719.1	-0.0963269	0.719381	0.689667	5-oxopent-3-ene-1,2,5-tricarboxylate decarboxylase
2.4.2.2	169064	172020	182967	180905	0.0394484	0.722418	0.691088	pyrimidine-nucleoside phosphorylase
1.13.11.16	233925	287749	261220	263284	-0.0471414	0.722166	0.691088	3-carboxyethylcatechol 2,3-dioxygenase
2.6.1.9	873276	884321	952416	850685	-0.0198364	0.722491	0.691088	histidinol-phosphate transaminase
4.1.2.17	247079	266122	280244	265913	0.0342689	0.722299	0.691088	L-fuculose-phosphate aldolase
1.1.1.3	578673	572803	598683	579003	-0.0217762	0.724357	0.692483	homoserine dehydrogenase
3.4.21.89	967459	973441	1.05443e+06	937525	-0.0193258	0.725221	0.692554	signal peptidase I
6.3.4.2	588606	585242	629202	607855	0.0213497	0.725247	0.692554	CTP synthase (glutamine hydrolysing)
3.5.1.18	1.73164e+06	1.66749e+06	1.79974e+06	1.68874e+06	-0.0174338	0.727095	0.693928	succinyl-diaminopimelate desuccinylase
4.2.3.130	1675.55	1783.44	2157.9	1153.37	-0.134289	0.727845	0.694254	tetraprenyl-beta-curcumene synthase
1.13.11.73	599.985	646.901	544.436	876.731	0.147466	0.729426	0.695371	methylphosphonate synthase
3.2.1.15	121728	102780	128798	96120.9	-0.057588	0.730301	0.695424	polygalacturonase
3.4.21.107	3.28632e+06	3.30993e+06	3.53349e+06	3.24198e+06	-0.017227	0.729903	0.695424	peptidase Do
2.3.1.118	63483.2	53408.5	69676.8	57271.6	0.0616164	0.734444	0.696634	N-hydroxyarylamine O-acetyltransferase
2.7.4.3	710096	649665	745123	647459	-0.0222065	0.733099	0.696634	adenylate kinase
2.7.2.7	1210.51	368.325	1020.36	396.843	-0.225424	0.733571	0.696634	butyrate kinase
4.1.1.47	31689.5	26850.2	36031.2	28102.6	0.0726792	0.732133	0.696634	tartronate-semialdehyde synthase
1.17.-.-	290438	315063	333256	309959	0.0310171	0.734373	0.696634	Acting on CH or CH(2) groups
3.1.4.4	478641	533521	548388	524344	0.0282481	0.734011	0.696634	phospholipase D
1.1.3.15	358300	365844	374972	363257	-0.0266762	0.734049	0.696634	(S)-2-hydroxy-acid oxidase
6.3.2.5	496813	471488	518889	502188	0.0227031	0.735491	0.697218	phosphopantothenate---cysteine ligase
3.2.2.21	691538	660639	733339	654246	-0.0189474	0.737762	0.697218	DNA-3-methyladenine glycosylase II
4.1.3.39	111725	118065	133152	113761	0.0453406	0.737481	0.697218	4-hydroxy-2-oxovalerate aldolase
3.1.1.15	111099	111411	118106	120128	0.0455867	0.736545	0.697218	L-arabinonolactonase
1.3.1.19	7421.24	4320.22	6150.99	5140.96	-0.110156	0.735993	0.697218	cis-1,2-dihydrobenzene-1,2-diol dehydrogenase
3.1.21.4	77291	87743.2	108992	72242.7	0.0690038	0.737485	0.697218	type II site-specific deoxyribonuclease
3.5.1.90	19241.1	21034.3	19567.8	20158.1	-0.0731109	0.737934	0.697218	adenosylcobinamide hydrolase
2.5.1.7	607123	592524	619029	608238	-0.020833	0.738845	0.697303	UDP-N-acetylglucosamine 1-carboxyvinyltransferase
3.6.1.-	1.7062e+06	1.58955e+06	1.80426e+06	1.66184e+06	0.0175948	0.738632	0.697303	In phosphorus-containing anhydrides
6.1.1.22	345267	380414	397602	372238	0.0291207	0.740964	0.698876	asparagine---tRNA ligase
2.7.1.5	181447	144171	181966	166773	0.045087	0.741335	0.698876	rhamnulokinase
5.1.3.23	32350.6	32780.8	34723	35898.9	0.0642019	0.741984	0.6991	UDP-2,3-diacetamido-2,3-dideoxyglucuronic acid 2-epimerase
3.2.2.20	570188	575539	600520	573063	-0.0201413	0.744187	0.700787	DNA-3-methyladenine glycosylase I
6.1.1.3	626063	630897	675131	647736	0.0190992	0.744938	0.701105	threonine---tRNA ligase
2.7.7.4	1.00542e+06	944564	1.06807e+06	982382	0.0172579	0.747118	0.701118	sulfate adenylyltransferase
3.1.26.12	188686	175399	193261	176196	-0.0342538	0.747795	0.701118	ribonuclease E
3.5.5.7	119649	99120.7	113182	106470	-0.0476915	0.746705	0.701118	aliphatic nitrilase
2.1.3.6	295.463	230.663	292.078	206.004	-0.139741	0.745909	0.701118	putrescine carbamoyltransferase
4.3.1.2	16248.8	15777.8	15815.2	15817.2	-0.0710306	0.746696	0.701118	methylaspartate ammonia-lyase
1.14.13.1	1570.13	2394.06	1729.53	2050.63	-0.120357	0.745628	0.701118	salicylate 1-monooxygenase
2.4.99.19	534.929	520.863	472.665	720.268	0.1343	0.749358	0.701764	undecaprenyl-diphosphooligosaccharide---protein glycotransferase
1.11.1.10	1.27284e+06	1.23929e+06	1.37955e+06	1.20208e+06	-0.0177046	0.749337	0.701764	chloride peroxidase
3.6.1.57	3396.11	3126.37	4390.25	2906.94	0.0977307	0.751488	0.702596	UDP-2,4-diacetamido-2,4,6-trideoxy-beta-L-altropyranose hydrolase
3.2.2.27	91899.1	81307.5	103206	83492.6	0.0498624	0.75145	0.702596	uracil-DNA glycosylase
4.99.1.3	150668	131947	173966	130529	0.0471889	0.751487	0.702596	sirohydrochlorin cobaltochelatase
2.4.1.1	976269	987059	1.09847e+06	916342	-0.0213017	0.752012	0.702699	glycogen phosphorylase
1.14.13.22	862.503	1304.98	1291.14	788.481	-0.131075	0.752587	0.702849	cyclohexanone monooxygenase
1.14.13.92	206880	202667	227056	207821	0.0308504	0.753248	0.703079	phenylacetone monooxygenase
5.4.2.6	110981	116432	134248	110004	0.0435861	0.755499	0.70441	beta-phosphoglucomutase
3.4.13.21	88892.2	99223.5	100953	100874	0.0471473	0.755503	0.70441	dipeptidase E
5.3.2.5	756.509	972.431	1004.4	939.972	0.111694	0.75755	0.705931	2,3-diketo-5-methylthiopentyl-1-phosphate enolase
3.5.4.26	509564	478757	519826	492160	-0.0202631	0.75872	0.706633	diaminohydroxyphosphoribosylaminopyrimidine deaminase
2.6.1.34	2780.43	4068.13	4072.63	3567.09	0.0974868	0.760172	0.707103	UDP-N-acetylbacillosamine transaminase
1.1.1.80	9289.39	8644.37	11213.3	8500.71	0.0759914	0.76075	0.707103	isopropanol dehydrogenase (NADP+)
2.6.1.82	103216	84313.3	105041	83371.2	-0.0514287	0.76089	0.707103	putrescine aminotransferase
2.7.1.2	864878	820721	994620	791949	0.024517	0.760578	0.707103	glucokinase
2.8.1.8	574524	585286	598367	589140	-0.0199384	0.762886	0.707409	lipoyl synthase
1.18.1.5	39390.5	40722.8	39704.5	40218.5	-0.0567491	0.762508	0.707409	putidaredoxin---NAD+ reductase
2.7.1.35	79763.1	78321.2	88592.5	70691.2	-0.0487455	0.762569	0.707409	pyridoxal kinase
1.14.19.7	2867.59	4678.53	4973.51	3540.1	0.106791	0.762774	0.707409	(S)-2-hydroxypropylphosphonic acid epoxidase
1.1.1.56	24781.9	20237.3	26291.9	22671.7	0.065336	0.763674	0.707753	ribitol 2-dehydrogenase
3.2.2.9	168003	170573	201816	160317	0.0369756	0.765731	0.709121	adenosylhomocysteine nucleosidase
1.1.1.58	25546.8	22810.8	29177.5	23363.1	0.0609664	0.773403	0.709431	tagaturonate reductase
1.2.7.3	195475	198295	210076	191114	-0.0292716	0.774608	0.709431	2-oxoglutarate synthase
1.4.3.21	139661	130648	151309	136407	0.034276	0.775597	0.709431	primary-amine oxidase
2.7.1.103	18274.3	16251.7	18589.2	15796.8	-0.0628621	0.775666	0.709431	viomycin kinase
5.3.3.14	7000.82	6779.38	7089.77	7921.14	0.0734759	0.773996	0.709431	trans-2-decenoyl-[acyl-carrier protein] isomerase
4.1.99.1	68123.9	53374.2	71876.2	59516.6	0.0563078	0.767495	0.709431	tryptophanase
2.1.1.74	286483	311148	309039	300171	-0.0272436	0.77406	0.709431	methylenetetrahydrofolate---tRNA-(uracil54-C5)-methyltransferase (FADH2-oxidizing)
2.7.2.2	135655	101376	125256	128771	0.0498266	0.77077	0.709431	carbamate kinase
2.3.1.54	106261	79546.5	95435.9	103998	0.05367	0.774349	0.709431	formate C-acetyltransferase
1.1.1.83	77340.7	77361.6	84389.8	71619.9	-0.0459218	0.767557	0.709431	D-malate dehydrogenase (decarboxylating)
6.3.2.1	480332	463117	500680	466968	-0.0185157	0.775823	0.709431	pantoate---beta-alanine ligase (AMP-forming)
5.1.3.7	19449.9	20468.6	26469.9	17473	0.0730155	0.769969	0.709431	UDP-N-acetylglucosamine 4-epimerase
2.6.1.50	7156.91	6458.44	7940.71	6926.68	0.0706303	0.775599	0.709431	glutamine---scyllo-inositol transaminase
2.3.1.184	19830.2	22918	25721.6	20861.1	0.063353	0.775694	0.709431	acyl-homoserine-lactone synthase
1.5.5.1	342094	322973	346976	332537	-0.0230938	0.773426	0.709431	electron-transferring-flavoprotein dehydrogenase
1.14.13.151	80521.9	74875.5	87297.8	69367.2	-0.0475684	0.771939	0.709431	linalool 8-monooxygenase
1.8.1.-	108835	98295.6	116124	93356.3	-0.0424412	0.77593	0.709431	With NAD(+) or NADP(+) as acceptor
4.1.2.38	9449.62	10059.7	8739.45	10409.1	-0.0759935	0.768531	0.709431	benzoin aldolase
2.4.99.17	685139	647563	703282	664936	-0.0165479	0.769713	0.709431	S-adenosylmethionine:tRNA ribosyltransferase-isomerase
1.5.1.-	179894	148205	180673	151291	-0.0398659	0.767807	0.709431	With NAD(+) or NADP(+) as acceptor
1.14.12.22	27813.4	40418.3	34720.3	32822.5	-0.0728074	0.768485	0.709431	carbazole 1,9a-dioxygenase
3.6.3.53	35602.6	32240.4	38379.4	29501.2	-0.05921	0.772832	0.709431	Ag+-exporting ATPase
2.1.1.113	347375	313759	362683	335551	0.0240509	0.773164	0.709431	site-specific DNA-methyltransferase (cytosine-N4-specific)
1.17.4.2	15315.8	10370	12837.3	15172.8	0.0796607	0.779459	0.709807	ribonucleoside-triphosphate reductase
2.7.1.56	75809.6	52216.9	69425.7	68724.1	0.0593181	0.781465	0.709807	1-phosphofructokinase
3.5.4.12	9809.44	7476.8	8593.9	8444.28	-0.0723986	0.780341	0.709807	dCMP deaminase
1.20.9.1	16214.2	15346.8	18025.9	16184.1	0.0602966	0.781253	0.709807	arsenate reductase (azurin)
2.8.1.6	330770	329215	345264	329816	-0.0220214	0.781777	0.709807	biotin synthase
2.7.4.8	494280	503710	530391	519629	0.0191891	0.781407	0.709807	guanylate kinase
1.1.1.340	217167	197043	217205	204441	-0.0285961	0.781312	0.709807	1-deoxy-11beta-hydroxypentalenate dehydrogenase
2.3.3.9	356330	355882	378237	372387	0.0219682	0.780477	0.709807	malate synthase
2.3.3.5	78370	72758.1	81503.3	80086.5	0.0433292	0.778707	0.709807	2-methylcitrate synthase
1.1.1.193	488864	459637	498110	474065	-0.0186916	0.781463	0.709807	5-amino-6-(5-phosphoribosylamino)uracil reductase
1.3.5.3	68503.6	43618.7	56369.9	54437.8	-0.0675387	0.779251	0.709807	protoporphyrinogen IX dehydrogenase (menaquinone)
5.3.1.4	87236.3	62903.5	84898.5	65298.1	-0.0574906	0.783002	0.71054	L-arabinose isomerase
2.5.1.81	52839.5	40236.4	47450.7	45440.3	-0.0551207	0.786012	0.710965	geranylfarnesyl diphosphate synthase
1.2.1.12	700326	703917	741774	732674	0.0166043	0.786821	0.710965	glyceraldehyde-3-phosphate dehydrogenase (phosphorylating)
2.5.1.97	51346.8	56933.1	63387.7	53344.8	0.0492548	0.784735	0.710965	pseudaminic acid synthase
2.4.2.52	7083.46	5998.44	7968.45	4970.78	-0.0809297	0.785805	0.710965	triphosphoribosyl-dephospho-CoA synthase
1.8.4.12	943095	908377	1.00316e+06	902390	-0.0145429	0.784122	0.710965	peptide-methionine (R)-S-oxide reductase
1.3.1.29	3616.96	5631.02	4560.16	4497.93	-0.087486	0.785467	0.710965	cis-1,2-dihydro-1,2-dihydroxynaphthalene dehydrogenase
1.17.1.5	443466	456693	451711	467320	-0.0227343	0.784548	0.710965	nicotinate dehydrogenase
2.5.1.72	455918	454646	473303	460157	-0.0183333	0.79155	0.711326	quinolinate synthase
2.4.2.1	554847	517165	557271	541786	-0.0176303	0.792189	0.711326	purine-nucleoside phosphorylase
5.3.1.15	14850.6	12107.2	15671.9	13584.5	0.0623283	0.791064	0.711326	D-lyxose ketol-isomerase
4.2.1.35	68379.6	66452.6	78262.1	66269.2	0.042332	0.792893	0.711326	(R)-2-methylmalate dehydratase
3.2.1.17	319247	309893	339180	323911	0.021388	0.790526	0.711326	lysozyme
1.1.1.39	1682.83	1638.97	1577.75	1668.08	-0.0849989	0.79109	0.711326	malate dehydrogenase (decarboxylating)
2.7.1.31	67888.5	52312.7	70140.3	59272.2	0.0505935	0.792655	0.711326	glycerate 3-kinase
1.1.1.34	69749.9	64734.8	69532.7	66049.6	-0.0424696	0.791684	0.711326	hydroxymethylglutaryl-CoA reductase (NADPH)
2.7.7.6	2.34893e+06	2.32005e+06	2.49362e+06	2.31505e+06	-0.0128625	0.793085	0.711326	DNA-directed RNA polymerase
3.4.25.2	375545	401866	417512	402241	0.0214797	0.790772	0.711326	HslU---HslV peptidase
2.4.1.8	2787.98	2015.69	3084.93	1602.7	-0.103924	0.792363	0.711326	maltose phosphorylase
3.1.1.75	7638.95	6389.51	8401.31	6902.17	0.0679741	0.790514	0.711326	poly(3-hydroxybutyrate) depolymerase
2.1.1.90	1445.46	593.521	1353.34	571.171	-0.153135	0.788327	0.711326	methanol---corrinoid protein Co-methyltransferase
3.1.1.87	183459	161243	194817	171315	0.0310858	0.788726	0.711326	fumonisin B1 esterase
2.3.2.6	354808	350796	367974	375193	0.0220986	0.793978	0.711509	leucyltransferase
2.3.1.20	378284	316619	384438	350066	0.0254466	0.794128	0.711509	diacylglycerol O-acyltransferase
2.7.4.1	682353	670974	725080	668051	-0.0137519	0.799506	0.713316	polyphosphate kinase
2.7.8.13	529985	532387	562586	553403	0.0171434	0.797558	0.713316	phospho-N-acetylmuramoyl-pentapeptide-transferase
6.4.1.6	23594.5	19673.9	22309.3	20914.8	-0.0551518	0.798407	0.713316	acetone carboxylase
2.6.1.76	38138.1	37540.5	43678.9	37693.6	0.0472127	0.799216	0.713316	diaminobutyrate---2-oxoglutarate transaminase
4.3.2.1	631340	608625	636052	635647	-0.016624	0.797296	0.713316	argininosuccinate lyase
1.20.4.1	62134.5	65174.6	76805.3	60173.2	0.0448616	0.799026	0.713316	arsenate reductase (glutaredoxin)
4.1.2.27	38355.9	28974.5	36032.7	31285.8	-0.0552461	0.79873	0.713316	sphinganine-1-phosphate aldolase
2.5.1.15	580483	535932	592126	554421	-0.0161438	0.800689	0.713996	dihydropteroate synthase
6.5.1.2	608788	590639	624232	607676	-0.0153368	0.801728	0.714548	DNA ligase (NAD+)
1.8.98.-	71268	66313.1	77261.9	61928.3	-0.0422781	0.802679	0.71502	With other, known, acceptors
1.13.11.47	3864.34	3997.36	4547.49	4015.58	0.066196	0.805681	0.715274	3-hydroxy-4-oxoquinoline 2,4-dioxygenase
2.1.1.101	118384	124060	127284	119320	-0.0310863	0.810315	0.715274	macrocin O-methyltransferase
1.14.13.106	255890	250627	286844	231742	-0.0253018	0.807013	0.715274	epi-isozizaene 5-monooxygenase
1.6.5.2	353829	351844	383626	358858	0.0181234	0.80899	0.715274	NAD(P)H dehydrogenase (quinone)
4.1.3.36	312949	297343	303505	318882	-0.0232168	0.810787	0.715274	1,4-dihydroxy-2-naphthoyl-CoA synthase
2.7.1.85	1885.9	1676.8	1740.15	2153.77	0.0817626	0.807048	0.715274	beta-glucoside kinase
6.3.2.17	496620	473499	528146	469378	-0.0161421	0.808056	0.715274	tetrahydrofolate synthase
2.4.1.56	7525.83	7565.12	9072.61	7319.21	0.0597741	0.80943	0.715274	lipopolysaccharide N-acetylglucosaminyltransferase
4.2.3.47	255890	250627	286844	231742	-0.0253018	0.807013	0.715274	beta-farnesene synthase
2.7.1.29	16402.7	12264.8	18598.3	9817.83	-0.0813349	0.806017	0.715274	glycerone kinase
2.1.3.1	236843	209164	239401	231444	0.0249173	0.810154	0.715274	methylmalonyl-CoA carboxytransferase
2.1.3.3	579339	539893	582736	565900	-0.0161936	0.804935	0.715274	ornithine carbamoyltransferase
3.1.1.41	69756.1	67801.4	69886.8	76840.2	0.042669	0.803432	0.715274	cephalosporin-C deacetylase
6.3.5.2	685589	680523	726562	705596	0.0139623	0.809839	0.715274	GMP synthase (glutamine-hydrolysing)
2.7.3.9	520009	506720	562860	515297	0.0148366	0.81075	0.715274	phosphoenolpyruvate---protein phosphotransferase
3.2.1.98	9777.69	9506.45	10177.7	9094.31	-0.0572429	0.807717	0.715274	glucan 1,4-alpha-maltohexaosidase
4.1.1.1	9022.6	5524.13	9835.46	4397.93	-0.10262	0.805827	0.715274	pyruvate decarboxylase
2.4.1.250	1.94065e+06	1.86634e+06	2.07532e+06	1.8497e+06	-0.0122754	0.811455	0.715332	D-inositol-3-phosphate glycosyltransferase
2.7.1.16	122088	101429	129613	96997.6	-0.0401761	0.811921	0.715371	ribulokinase
6.1.1.11	590991	583187	631357	600006	0.0138857	0.813453	0.716349	serine---tRNA ligase
6.1.1.21	568309	553619	606877	569917	0.0139348	0.814597	0.716985	histidine---tRNA ligase
2.1.1.182	540883	512496	563226	520182	-0.0146297	0.81509	0.717047	16S rRNA (adenine1518-N6/adenine1519-N6)-dimethyltransferase
5.4.2.1	1.27667e+06	1.26579e+06	1.38057e+06	1.28287e+06	0.0116658	0.817547	0.718464	phosphoglycerate mutase
4.1.3.27	1.08277e+06	1.0741e+06	1.14634e+06	1.11257e+06	0.0125229	0.818943	0.718575	anthranilate synthase
2.2.1.10	22275.8	21653.8	26040.8	21273.5	0.0482014	0.818766	0.718575	2-amino-3,7-dideoxy-D-threo-hept-6-ulosonate synthase
2.3.1.39	642036	608600	661488	625417	-0.0132737	0.818251	0.718575	[acyl-carrier-protein] S-malonyltransferase
5.1.3.9	6616.91	6005.33	9579.73	4488.57	0.0832765	0.819796	0.718951	N-acylglucosamine-6-phosphate 2-epimerase
2.5.1.77	833076	864528	897964	881952	0.0140931	0.823076	0.719322	7,8-didemethyl-8-hydroxy-5-deazariboflavin synthase
1.2.1.28	57066.6	28332.4	43560.4	40514.3	-0.0721553	0.822853	0.719322	benzaldehyde dehydrogenase (NAD+)
5.4.99.5	591056	579834	637355	590292	0.0128868	0.823183	0.719322	chorismate mutase
1.3.1.33	30665.4	31414.9	33502.1	29173.5	-0.0437484	0.822471	0.719322	protochlorophyllide reductase
1.14.13.154	32473.9	40252.4	37129.9	36058	-0.0469359	0.823137	0.719322	erythromycin 12-hydroxylase
3.5.2.7	717584	724389	770459	740697	0.0130211	0.82099	0.719322	imidazolonepropionase
4.1.2.19	5003.71	2978.97	4401.85	3468.17	-0.0763206	0.822553	0.719322	rhamnulose-1-phosphate aldolase
3.2.1.122	2859.15	1529.98	2585.08	2244.26	0.085658	0.823743	0.719418	maltose-6'-phosphate glucosidase
1.8.1.15	14146.5	13614.5	17391.1	10466.1	-0.062355	0.824142	0.719418	mycothione reductase
6.3.2.13	488713	467140	507455	494804	0.0146845	0.829285	0.720227	UDP-N-acetylmuramoyl-L-alanyl-D-glutamate---2,6-diaminopimelate ligase
1.2.7.7	98874.1	76300.1	99171.5	78223.9	-0.0397174	0.828897	0.720227	3-methyl-2-oxobutanoate dehydrogenase (ferredoxin)
2.1.1.64	1.53425e+06	1.52903e+06	1.69147e+06	1.51839e+06	0.0110038	0.830888	0.720227	3-demethylubiquinol 3-O-methyltransferase
5.3.3.10	37506.8	30961.1	38670.7	30404	-0.0458278	0.827425	0.720227	5-carboxymethyl-2-hydroxymuconate Delta-isomerase
2.1.1.258	70610.4	51396.6	69029.7	61502.5	0.0435003	0.82892	0.720227	5-methyltetrahydrofolate:corrinoid/iron-sulfur protein Co-methyltransferase
6.1.1.15	660307	645887	704688	663519	0.01201	0.826501	0.720227	proline---tRNA ligase
1.14.14.-	588958	621682	627750	643027	0.0167763	0.827283	0.720227	With reduced flavin or flavoprotein as one donor, and incorporation of one atom of oxygen
2.3.3.13	630571	628737	670771	648568	0.0128674	0.826901	0.720227	2-isopropylmalate synthase
2.7.1.33	583609	570395	617439	591598	0.0128075	0.83098	0.720227	pantothenate kinase
1.20.4.3	3259.84	2581.23	3517.63	2289.79	-0.071596	0.828572	0.720227	mycoredoxin
4.2.3.124	4431.47	2546.96	4904.66	1924.1	-0.104902	0.827883	0.720227	2-deoxy-scyllo-inosose synthase
2.7.1.72	50830.7	41627.3	51274	47448.7	0.0407228	0.82956	0.720227	streptomycin 6-kinase
6.3.2.32	402.761	706.041	548.489	533.787	-0.0943286	0.829945	0.720227	coenzyme gamma-F420-2:alpha-L-glutamate ligase
4.1.1.36	613399	575146	634182	589589	-0.0127658	0.831007	0.720227	phosphopantothenoylcysteine decarboxylase
2.7.1.55	691.983	492.636	1208.07	200.481	0.157019	0.832095	0.720435	allose kinase
3.4.11.1	706744	701406	740115	710186	-0.0119421	0.83202	0.720435	leucyl aminopeptidase
2.3.1.59	1362.29	717.425	1005.6	1274.34	0.0917057	0.833379	0.720541	gentamicin 2'-N-acetyltransferase
4.5.1.-	20294.7	20168.5	19259.1	21311.3	-0.0466776	0.832755	0.720541	Carbon-halide lyases
1.1.1.130	7696.37	11698.5	12270.5	8948.13	0.0637666	0.835255	0.721348	3-dehydro-L-gulonate 2-dehydrogenase
4.1.99.2	10782.6	10798.1	10793.9	12334.5	0.0502645	0.837823	0.721348	tyrosine phenol-lyase
3.1.3.26	16347.8	22522.7	23049.7	16084	-0.0565888	0.83714	0.721348	4-phytase
2.7.6.5	533473	542237	569181	558300	0.0137403	0.837692	0.721348	GTP diphosphokinase
1.5.1.38	57901.9	46927.4	59121.5	52675.8	0.037988	0.838673	0.721348	FMN reductase (NADPH)
6.1.1.7	622160	606119	644540	620270	-0.0119677	0.838544	0.721348	alanine---tRNA ligase
2.4.99.13	340599	346539	371044	335603	-0.016005	0.838223	0.721348	(Kdo)-lipid IVA 3-deoxy-D-manno-octulosonic acid transferase
6.3.4.5	605014	596644	624805	611597	-0.0127488	0.836799	0.721348	argininosuccinate synthase
4.1.99.12	647325	655098	677045	663399	-0.0125532	0.837491	0.721348	3,4-dihydroxy-2-butanone-4-phosphate synthase
1.14.13.163	21669.7	24378.3	28018.7	18492.9	-0.0516589	0.837102	0.721348	6-hydroxy-3-succinoylpyridine 3-monooxygenase
1.7.2.3	3440.57	4527.51	4064.76	4555.84	0.0609403	0.840114	0.721744	trimethylamine-N-oxide reductase (cytochrome c)
3.5.1.16	417785	431451	472888	419595	0.0145886	0.841259	0.721744	acetylornithine deacetylase
2.4.1.245	186717	181436	196260	180844	-0.0208091	0.841223	0.721744	alpha,alpha-trehalose synthase
1.1.1.276	30976.9	29085.4	35075.7	29211.3	0.040029	0.839592	0.721744	serine 3-dehydrogenase (NADP+)
3.2.1.170	40036.8	35518.6	41105.9	35414.1	-0.0383008	0.840863	0.721744	mannosylglycerate hydrolase
2.5.1.55	426495	445073	462945	433889	-0.0143728	0.842374	0.722336	3-deoxy-8-phosphooctulonate synthase
2.6.1.77	2691.91	2892.15	2658.97	3367.04	0.0625324	0.842999	0.722507	taurine---pyruvate aminotransferase
3.2.2.23	735823	721438	775679	749084	0.0111201	0.84369	0.722734	DNA-formamidopyrimidine glycosylase
3.11.1.3	30739.5	42573.7	38461.3	35522.2	-0.0453419	0.845403	0.723836	phosphonopyruvate hydrolase
1.1.1.86	577670	583085	621379	594125	0.011749	0.847638	0.725019	ketol-acid reductoisomerase (NADP+)
2.8.3.9	7755.5	4607.69	6375.79	5904.33	-0.0609947	0.847584	0.725019	butyrate---acetoacetate CoA-transferase
3.3.1.1	684577	662793	704518	683579	-0.0109995	0.848944	0.72577	adenosylhomocysteinase
1.8.99.3	7723.23	3501.35	8257.1	2774.53	-0.100342	0.855438	0.728777	hydrogensulfite reductase
2.7.6.1	725163	715843	763106	743680	0.0103932	0.857669	0.728777	ribose-phosphate diphosphokinase
2.3.1.129	472656	511899	532326	501034	0.0139978	0.853851	0.728777	acyl-[acyl-carrier-protein]---UDP-N-acetylglucosamine O-acyltransferase
1.1.1.85	827457	827177	878250	852156	0.0103594	0.855624	0.728777	3-isopropylmalate dehydrogenase
2.7.1.165	182666	192912	212331	184004	0.0196708	0.858143	0.728777	glycerate 2-kinase
2.1.1.192	565706	550611	594327	573845	0.0113584	0.854439	0.728777	23S rRNA (adenine2503-C2)-methyltransferase
2.1.3.-	292844	281198	335170	255191	-0.0203372	0.8589	0.728777	Carboxy- and carbamoyltransferases
2.3.3.1	1.30281e+06	1.27309e+06	1.33538e+06	1.31916e+06	-0.0101514	0.858386	0.728777	citrate (Si)-synthase
1.1.2.7	23617.4	21871.1	24593.8	23865.8	0.0377334	0.854272	0.728777	methanol dehydrogenase (cytochrome c)
4.2.1.90	452683	466980	493746	470092	0.0126335	0.856454	0.728777	L-rhamnonate dehydratase
4.2.1.112	107911	111845	121056	111187	0.0236147	0.858825	0.728777	acetylene hydratase
3.4.23.52	521.977	362.971	587.265	288.384	-0.0859567	0.85757	0.728777	preflagellin peptidase
2.7.1.23	575793	552149	613609	550131	-0.0110562	0.855816	0.728777	NAD+ kinase
3.1.1.83	157934	153944	166785	152790	-0.0204866	0.853938	0.728777	monoterpene epsilon-lactone hydrolase
1.10.3.4	311.487	288.258	332.266	320.814	0.0707521	0.859412	0.728847	o-aminophenol oxidase
1.13.11.56	12166.7	17251	16399.7	15225.7	0.0459186	0.862575	0.731165	1,2-dihydroxynaphthalene dioxygenase
1.1.1.218	2944.02	2031.48	3189.63	2214.54	0.0591046	0.863929	0.731717	morphine 6-dehydrogenase
1.8.5.2	5090.26	3562.46	4052.81	4572.19	-0.0514303	0.866675	0.731717	thiosulfate dehydrogenase (quinone)
2.1.2.1	620551	608803	652172	633121	0.0101352	0.864972	0.731717	glycine hydroxymethyltransferase
2.1.1.13	665040	646977	692155	661430	-0.00943905	0.866114	0.731717	methionine synthase
1.1.1.251	3574.49	2953.77	3457.69	3540.53	0.0494213	0.864261	0.731717	galactitol-1-phosphate 5-dehydrogenase
2.7.7.53	306809	301310	326752	299347	-0.0136862	0.866483	0.731717	ATP adenylyltransferase
1.13.11.50	13230.8	14733	14887.4	13441.5	-0.0385128	0.86615	0.731717	acetylacetone-cleaving enzyme
4.1.1.74	148170	122698	162513	114644	-0.0285214	0.870257	0.733283	indolepyruvate decarboxylase
1.5.1.12	602149	568130	617864	605430	0.0104616	0.870129	0.733283	1-pyrroline-5-carboxylate dehydrogenase
1.1.1.298	9083.47	10396.4	10895.3	9935.58	0.0396377	0.869956	0.733283	3-hydroxypropionate dehydrogenase (NADP+)
1.14.13.9	82756.1	77350.8	92372.2	71428.7	-0.0271979	0.870149	0.733283	kynurenine 3-monooxygenase
2.8.1.12	441267	433040	461760	439447	-0.0109128	0.872285	0.7339	molybdopterin synthase
2.4.2.17	497244	480946	512689	495388	-0.0106527	0.872158	0.7339	ATP phosphoribosyltransferase
2.6.1.52	371537	353863	382504	364403	-0.01219	0.871519	0.7339	phosphoserine transaminase
2.7.7.60	502080	473608	526165	480485	-0.0103952	0.873534	0.734587	2-C-methyl-D-erythritol 4-phosphate cytidylyltransferase
2.1.1.217	1162.86	1505.42	1031.44	1599.97	-0.0635706	0.874837	0.734954	tRNA (adenine22-N1)-methyltransferase
4.1.2.25	257051	232927	261949	241768	-0.0149174	0.874812	0.734954	dihydroneopterin aldolase
2.7.7.8	598351	586434	616180	605239	-0.00978532	0.876016	0.735581	polyribonucleotide nucleotidyltransferase
3.6.3.38	774.795	615.878	792.54	599.356	-0.0582392	0.877079	0.736109	capsular-polysaccharide-transporting ATPase
3.1.3.2	50170	53506.2	64107.7	41896.1	-0.0339038	0.879224	0.736983	acid phosphatase
1.14.15.11	2659.62	2406.74	2684.02	2733.18	0.0443334	0.881124	0.736983	pentalenic acid synthase
3.2.2.4	83309.3	63533.2	88965.9	67191.3	0.0297146	0.881471	0.736983	AMP nucleosidase
2.4.1.57	1.26181e+06	1.25138e+06	1.37918e+06	1.22028e+06	-0.00810721	0.879413	0.736983	phosphatidylinositol alpha-mannosyltransferase
2.7.1.24	502123	480796	532600	482254	-0.00970944	0.880191	0.736983	dephospho-CoA kinase
2.5.1.10	505089	493522	537083	494017	-0.00937518	0.881644	0.736983	(2E,6E)-farnesyl diphosphate synthase
2.3.1.181	855832	825910	924572	814515	-0.00831309	0.882027	0.736983	lipoyl(octanoyl) transferase
4.2.1.130	311397	372494	362876	356274	0.0170713	0.881053	0.736983	D-lactate dehydratase
2.7.1.6	317210	289348	343268	293773	0.0137182	0.880152	0.736983	galactokinase
1.14.13.165	10417.7	9242.54	10389	9544.88	-0.034868	0.883102	0.737518	nitric-oxide synthase [NAD(P)H]
2.5.1.75	519992	479793	547862	497984	0.0095743	0.886425	0.738168	tRNA dimethylallyltransferase
3.11.1.1	120043	105819	137290	94454.2	-0.0257806	0.886488	0.738168	phosphonoacetaldehyde hydrolase
3.1.3.-	3.28616e+06	3.21532e+06	3.61322e+06	3.18416e+06	0.00741158	0.886199	0.738168	Phosphoric monoester hydrolases
3.7.1.-	137782	117118	139334	122015	-0.0197123	0.885436	0.738168	In ketonic substances
3.6.3.31	1.05494e+06	1.10568e+06	1.16109e+06	1.0974e+06	0.00851385	0.885171	0.738168	polyamine-transporting ATPase
2.5.1.6	656268	645876	681053	662935	-0.00838116	0.885993	0.738168	methionine adenosyltransferase
3.4.13.9	261436	275277	287706	274955	0.0129928	0.88791	0.738989	Xaa-Pro dipeptidase
2.7.1.161	8848.88	14936.4	12547.9	11518.7	-0.0432476	0.890526	0.740441	CTP-dependent riboflavin kinase
1.1.1.342	468.26	586.006	752.382	309.363	-0.0694095	0.890262	0.740441	CDP-paratose synthase
4.2.1.68	96203.1	90490.5	93573.4	102585	0.0211075	0.892137	0.741054	L-fuconate dehydratase
1.8.2.3	287496	255453	281970	276181	-0.01311	0.892137	0.741054	sulfide-cytochrome-c reductase (flavocytochrome c)
5.4.99.12	586254	571214	611117	597297	0.00833376	0.893847	0.742112	tRNA pseudouridine38-40 synthase
1.3.1.14	503341	424427	492860	477364	0.0117385	0.896023	0.742466	dihydroorotate dehydrogenase (NAD+)
2.2.1.7	608288	566655	621927	591112	-0.00818114	0.894929	0.742466	1-deoxy-D-xylulose-5-phosphate synthase
3.4.17.11	318870	331461	343153	337358	0.0112408	0.895952	0.742466	glutamate carboxypeptidase
3.5.1.106	147188	140780	152213	143731	-0.0152155	0.895947	0.742466	N-formylmaleamate deformylase
2.3.1.202	1441.29	1840.98	2202.18	1127.52	-0.0529308	0.896977	0.742893	UDP-4-amino-4,6-dideoxy-N-acetyl-beta-L-altrosamine N-acetyltransferase
3.3.2.1	23061.2	30958.8	29472.2	25659.7	-0.0304669	0.897535	0.742994	isochorismatase
2.5.1.86	2094.05	1757.51	2289.52	1830.94	0.0391757	0.902222	0.74651	trans,polycis-decaprenyl diphosphate synthase
3.4.11.2	317165	297784	319461	323156	0.0109856	0.902711	0.74655	membrane alanyl aminopeptidase
1.1.1.53	495985	452606	511294	468497	-0.00839339	0.904557	0.747349	3alpha(or 20beta)-hydroxysteroid dehydrogenase
3.5.2.12	263724	270372	287807	271266	0.0106514	0.904492	0.747349	6-aminohexanoate-cyclic-dimer hydrolase
1.2.7.1	238980	231281	270267	215892	-0.0115244	0.915632	0.749098	pyruvate synthase
5.1.-.-	665232	661459	721929	651728	-0.00606044	0.913017	0.749098	Racemases and epimerases
2.4.99.12	369229	377680	406946	373797	0.0079137	0.915391	0.749098	lipid IVA 3-deoxy-D-manno-octulosonic acid transferase
3.5.1.103	252350	199869	248493	216592	-0.0148107	0.90817	0.749098	N-acetyl-1-D-myo-inositol-2-amino-2-deoxy-alpha-D-glucopyranoside deacetylase
1.1.1.269	123870	121906	128901	123949	-0.0134229	0.915289	0.749098	2-(S)-hydroxypropyl-CoM dehydrogenase
1.2.1.46	27376.5	25083.3	31486.3	22341.4	-0.0252006	0.911418	0.749098	formaldehyde dehydrogenase
4.1.3.4	429243	386915	431332	420409	0.00835337	0.915388	0.749098	hydroxymethylglutaryl-CoA lyase
3.6.3.17	1.33826e+06	1.13999e+06	1.31786e+06	1.24008e+06	-0.00807093	0.914086	0.749098	monosaccharide-transporting ATPase
5.3.99.-	320633	301459	334012	308324	-0.00892922	0.913009	0.749098	Other intramolecular oxidoreductases
3.1.21.1	3418.79	5906.11	5272.25	4227.44	-0.0375931	0.914302	0.749098	deoxyribonuclease I
4.2.3.118	1886.79	3135.78	2868.92	2229.82	-0.0431396	0.907189	0.749098	2-methylisoborneol synthase
4.99.1.1	500877	484471	533521	485595	-0.00716424	0.910479	0.749098	ferrochelatase
1.1.1.18	1.2257e+06	1.1745e+06	1.29827e+06	1.18683e+06	-0.00541794	0.915468	0.749098	inositol 2-dehydrogenase
3.1.26.5	284570	273358	306199	270054	-0.00999115	0.908632	0.749098	ribonuclease P
2.7.7.41	318171	307880	349043	306342	0.00924548	0.910798	0.749098	phosphatidate cytidylyltransferase
1.14.13.141	161307	137421	159494	147630	-0.0142095	0.910319	0.749098	cholest-4-en-3-one 26-monooxygenase
3.2.1.85	2755.04	2057.72	3011	1891.47	-0.0374682	0.915288	0.749098	6-phospho-beta-galactosidase
4.3.1.3	465446	437833	490573	443173	-0.00789066	0.907786	0.749098	histidine ammonia-lyase
4.1.1.23	536023	509324	570226	521240	0.00678489	0.913555	0.749098	orotidine-5'-phosphate decarboxylase
1.12.1.2	156961	124033	170095	118917	-0.0208937	0.90919	0.749098	hydrogen dehydrogenase
1.14.13.160	58340.1	63365.5	68546.1	59746	0.0180161	0.91594	0.749098	(2,2,3-trimethyl-5-oxocyclopent-3-enyl)acetyl-CoA 1,5-monooxygenase
6.1.1.9	619807	611702	653623	620208	-0.00601778	0.916444	0.74915	valine---tRNA ligase
3.4.11.4	140857	118321	135915	135468	0.0144213	0.917377	0.749552	tripeptide aminopeptidase
4.2.1.10	508978	524408	547856	530545	0.00695783	0.918662	0.749973	3-dehydroquinate dehydratase
[truncated: 139 more rows]
