# Supplementary material for: Metagenomics-informed soil biogeochemical models projected less carbon loss in tropical soils in response to climate warming
Source: Research Square preprint supplement (doi:10.21203/rs.3.rs-918612/v2), 2021-10-08
Supplement: Supplementary file 9 [file a87bc07e9cf8c7824570cd54.xlsx]

## Sheet: Sheet1
Supplementary Data S7. Initial soil physical and chemical properties
Variable	Description	Value	Unit	Source
fsand	Sand fraction	25	%	This study
fclay	Clay fraction	36	%	This study
fsilt	Silt fraction	39	%	This study
PH	Soil PH value	5.1	Unitless	17
TOC	Total organic C	40.99	mg C/cm3	17
TON	Total organic N	4.12	mg N/cm3	17
TOP	Total organic P	0.11	mg P/cm3	17
DOC	Dissolved organic carbon	0.197	mg C/cm3	17
MBC	Microbial biomass carbon	0.599	mg C/cm3	17
ENZ	Soil enzyme pool carbon	0.02	mg C/cm3	This study
NH4-	Ammonium N pool	0.005	mg N/cm3	17
NO3-	Nitrate N pool	0.004	mg N/cm3	17
TASOC	Total microbial-activated soil organic carbon	7.47	mg C/cm3	17,19
TMSOC	Total mineral-protected soil organic carbon	33.52	mg C/cm3	17,19
CNASOM	C/N ratio of total particulate organic matter	9.6	Unitless	17,19
CNMSOM	C/N ratio of total mineral organic matter	9.1	Unitless	17,19
CNDOM	C/N ratio of dissolved organic matter pool	5.5	Unitless	17
CNMB	C/N ratio of microbial biomass	12.5	Unitless	17
CNENZ	C/N ratio of soil enzyme pool	3.5	Unitless	This study
CPASOM	C/P ratio of TASOC	302.9	Unitless	17
CPMSOM	C/P ratio of TMSOM	402.5	Unitless	17
CPDOM	C/P ratio of dissolved organic matter pool	206.1	Unitless	17
CPMB	C/P ratio of microbial biomass	17.7	Unitless	17
CPENZ	C/P ratio of soil enzyme pool	48	Unitless	17
PIP	Primary mineral P pool	0.06	mg P/cm3	7,17
SIP	Secondary mineral P	0.01	mg P/cm3	7,17
OIP	Occluded inorganic P	0.031	mg P/cm3	7,17
DIP	Dissolved inorganic P	0.0003	mg P/cm3	7,17
QIP	Labile inorganic P	0.0002	mg P/cm3	7,17
	Fraction of AROMi to total ASOM, i=1,2,3,4,5,6,7 in CoMENDHD and CoMENDH	[0.0814,0.0325,0.0066,0.0255,0.0021, 1.21e-4,3.75e-4]*	Unitless	This study
	Fraction of AROMi to total ASOM, i=1,2,3,4,5,6,7 in CoMENDM	[0.1088, 0.0325, 0.0307, 0.0509, 0.0021, 0.0047, 3.751e-4]*	Unitless	This study
	Fraction of AROMi to total ASOM, i=1,2,3 in CoMENDL	[0.1413, 0.0816, 0.0072]*	Unitless	This study
	Fraction of ALOMi to total ASOM, i=1,3 in CoMENDHD and CoMENDH	[0.0181,0.0170]*	Unitless	This study
	Fraction of AOOMi to total ASOM, i=1,3,4,5,6 in CoMENDHD and CoMENDH	[0.0094,0.0071,0.0255, 2.134e-5,0.0046]*	Unitless	This study
	Fraction of MROMi to MSOM, i=1,2,3,4,5,6,7 in CoMENDHD and CoMENDH	[0.3436,0.1372,0.0192, 0.0903,9.32e-4,5.475e-5,1.698e-4]*	Unitless	This study
	Fraction of MROMi to MSOM, i=1,2,3,4,5,6,7 in CoMENDM	[0.4595, 0.1372, 0.0899, 0.1805, 9.416e-4, 0.0021, 1.698e-4]*	Unitless	This study
	Fraction of MROMi to MSOM, i=1,2,3 in CoMENDL	[0.5967, 0.2704, 0.0032]*	Unitless	This study
	Fraction of MLOMi to total MSOM, i=1,3 in CoMENDHD and CoMENDH	[0.0763,0.0498]*	Unitless	This study
	Fraction of MOOMi to total MSOM, i=1,3,4,5,6 in CoMENDHD and CoMENDH	[0.0395,0.0209,0.0903, 9.658e-6,0.0021]*	Unitless	This study
	Fraction of QROMi to total ASOM, i=1,2,3,4,5,6,7 in CoMENDHD and CoMENDH	[0.2706, 0.1081, 0.0134, 0.0653,0.0006,3.534e-5, 0.0001]*	Unitless	This study
	Fraction of QROMi to total ASOM, i=1,2,3,4,5,6,7 in CoMENDM	[0.3619, 0.1081, 0.0653,0.1305,0.0007, 0.0014,0.0001]*	Unitless	This study
	Fraction of QROMi to total ASOM, i=1,2,3 in CoMENDL	[0.4700, 0.1958, 0.0021]*	Unitless	This study
	Fraction of QLOMi to total ASOM, i=1,3 in CoMENDHD and CoMENDH	[0.0601, 0.0362]*	Unitless	This study
	Fraction of QOOMi to total ASOM, i=1,3,4,5,6 in CoMENDHD and CoMENDH	[0.0311, 0.0152, 0.0653, 0.0006,6.234e-6, 0.0013]*	Unitless	This study
	Fraction of QMOM to total ASOM	0.102	Unitless	This study
*The data in the bracket represent the data for the ith SOM pool described in the description column.
