# Supplementary material for: Metagenomics-informed soil biogeochemical models projected less carbon loss in tropical soils in response to climate warming
Source: Research Square preprint supplement (doi:10.21203/rs.3.rs-918612/v2), 2021-10-08
Supplement: Supplementary file 10 [file aad8f82f2d88d685aa5eedfc.xlsx]

## Sheet: Sheet1
Supplementary Data S4. Kinetic parameters in the CoMEND model
Parameter symbol	Description	Value	Unit	Source	Eq. ID
	Maximum specific decomposition rate for AROMi at 20 °C and optimum pH, where EAROMi,= Cendo1, Cendo2, Pexo1, Pexo2, and Pmono1 in CoMENDHD and CoMENDH;	[610.9, 7.3, 22.2, 100.5, 109.2]*,†,‡, a	mg C mg-1 C h-1	This study	Eq. S1
	EAROMi,= Ccarbohydrates, Clignin, Pnucleicacids, Pphospholipids, Pmono1, in CoMENDM.	[264.8, 7.3, 20.4, 99.8, 109.2] *,†,‡, b
	EAROMi,= CLignocellulose, PdiesterP in CoMENDL.	[155.13, 87.0] *,†,‡, c
	Half-saturation constant for AROMi decomposition at 20 °C and optimum pH, where EAROMi,= Cendo1, Cendo2, Pexo1, Pexo2 and Pmono1 in CoMENDHD and CoMENDH	[0.515, 0.044, 0.449,5.7e-4, 0.031] *,†,‡, a	mg C cm-3 soil	This study	Eq. S1
	EAROMi,= Ccarbohydrates, Clignin, Pnucleicacids, Pphospholipids, Pmono1, in CoMENDM.	[0.177, 0.044, 0.394, 0.021, 0.031] *,†,‡, b
	EAROMi,= CLignocellulose, PdiesterP in CoMENDL.	[0.120, 0.0814] *,†,‡, c
	The activation energy of Cendo1, Cendo2, Pexo1, Pexo2, and Pmono1 in CoMENDHD and CoMENDH	[38.5,52.5, 18.0,71.6,42.3]*,†,‡, a	kJ mol-1	This study	Eq. S96
	The activation energy of Ccarbohydrates, Clignin, Pnucleicacids, Pphospholipids, Pmono1, in CoMENDM.	[42.6, 52.5, 19.7,67.6, 42.3] *,†,‡, b
	EAROMi,= CLignocellulose, PdiesterP in CoMENDL.	[47.2, 59.9] *,†,‡, c
	The optimum pH of Cendo1, Cendo2, Pexo1, Pexo2, and Pmono1 in CoMENDHD and CoMENDH	[6.4,4.3,7.7,8.1, 5.1]*,†,‡, a	Unitless	This study	Eq. S97
	The activation energy of Ccarbohydrates, Clignin, Pnucleicacids, Pphospholipids, Pmono1, in CoMENDM.	[6.1, 4.3, 7.7, 7.8, 5.1] *,†,‡, b
	EAROMi,= CLignocellulose, PdiesterP in CoMENDL.	[5.3, 7.8] *,†,‡, c
	The pH sensitivity of Cendo1, Cendo2, Pexo1, Pexo2, and Pmono1 in CoMENDHD and CoMENDH	[1.9, 1.5, 1.3,4.3,2.1]*,†,‡, a	Unitless	This study	Eq. S97
	The activation energy of Ccarbohydrates, Clignin, Pnucleicacids, Pphospholipids, Pmono1, in CoMENDM.	[1.9, 1.5, 1.3, 2.8, 2.1] *,†,‡, b
	EAROMi,= CLignocellulose, PdiesterP in CoMENDL.	[1.7, 2.6] *,†,‡, c
	Maximum specific decomposition rate for ALOMi at 20 °C and optimum pH , where EALOMi,= Cexo	213.7‡a	mg C mg-1 C h-1	This study	Eq. S2
	Half-saturation constant for ALOMi decomposition at 20 °C and optimum pH, where EALOMi,= Cexo	0.054‡a	mg C cm-3 soil	This study	Eq. S2
	The activation energy of Cexo	43.4‡a	kJ mol-1	This study	Eq. S96
	The optimum pH of Cexo	6.3‡a	Unitless	This study	Eq. S97
	The pH sensitivity of Cexo	1.6‡a	Unitless	This study	Eq. S97
	Maximum specific decomposition rate for AOOMi at 20 °C and optimum pH, where EAOOMi,= Coligo, Poligo1, Poligo2	[96.9, 7.3,99.8]*,†,‡a	mg C mg-1 C h-1	This study	Eq. S3
	Half-saturation constant for AOOMi decomposition at 20 °C and optimum pH, where EAOOMi,= Coligo, Poligo1, Poligo2	[0.0392, 4.65e-3, 0.0215]*,†,‡a	mg C cm-3 soil	This study	Eq. S3
	The activation energy of Coligo, Poligo1, Poligo2	[44.8, 31.8, 67.6]*,†,‡a	kJ mol-1	This study	Eq. S96
	The optimum pH of Coligo, Poligo1, Poligo2	[5.8,7.6, 7.9]*,†,‡a	Unitless	This study	Eq. S97
	The pH sensitivity of Coligo, Poligo1, Poligo2	[2.0, 1.7, 2.8]*,†,‡a	Unitless	This study	Eq. S97
	Maximum specific immobilization rate at 20 °C and optimum pH for inorganic P	0.028‡	mg P mg-1 C h-1	This study	Eq. S24
	Half-saturation constant for dissolved inorganic P immobilization at 20 °C and optimum pH	4.0e-7‡	mg P cm-3 soil	This study	Eq. S24
	The activation energy of PinP	148.0‡	kJ mol-1	This study	Eq. S96
	The optimum pH of PinP	7.1‡	Unitless	This study	Eq. S97
	The pH sensitivity of PinP	1.5‡	Unitless	This study	Eq. S97
	Maximum specific rate for extracellular general monomer P mineralization at 20 °C and optimum pH in CoMENDHD, CoMENDH, and CoMENDM	204.4‡a, b	mg P mg-1 C h-1	This study	Eq. S25
	Maximum specific rate for extracellular monomer P (general monomer P and Inositol P) mineralization at 20 °C and optimum pH in CoMENDL	169.6‡c	mg P mg-1 C h-1	This study	Eq. S25
	Half-saturation constant for extracellular general monomer P mineralization at 20 °C and optimum pH in CoMENDHD, CoMENDH, and CoMENDM	0.0665‡a, b	mg P cm-3 soil	This study	Eq. S25
	Half-saturation constant for extracellular monomer P (general monomer P and Inositol P) mineralization at 20 °C and optimum pH in CoMENDL	0.0536‡c	mg P cm-3 soil	This study	Eq. S25
	The activation energy of Pmono2 in CoMENDHD, CoMENDH, and CoMENDM	36.3‡a, b	kJ mol-1	This study	Eq. S96
	The activation energy of PmonomerP in CoMENDL	38.5‡c	kJ mol-1	This study	Eq. S96
	The optimum pH of Pmono2	5.2‡a, b, c	Unitless	This study	Eq. S97
	The pH sensitivity of Pmono2 in CoMENDHD, CoMENDH, and CoMENDM	1.7‡a, b	Unitless	This study	Eq. S97
	The optimum pH of PmonomerP in CoMENDL	1.9‡c	Unitless	This study	Eq. S97
	Maximum specific rate for microbial P mineralization at 20 °C and optimum pH	55.7‡	mg P mg-1 C h-1	This study	Eq. S26
	Half-saturation constant for microbial P mineralization at 20 °C and optimum pH	0.0012‡	mg P cm-3 soil	This study	Eq. S26
	The activation energy of Pmono3	57.6‡	kJ mol-1	This study	Eq. S96
	The optimum pH of Pmono3	9.37‡	Unitless	This study	Eq. S97
	The pH sensitivity of Pmono3	1.84‡	Unitless	This study	Eq. S97
	The activation energy for SOM adsorption	5	kJ mol-1	28	Eq. S98
	The activation energy for SOM desorption	20	kJ mol-1	28	Eq. S99
	The activation energy for inorganic P adsorption	5	kJ mol-1	28	Eq. S100
	The activation energy for inorganic P desorption	20	kJ mol-1	28	Eq. S101
	The activation energy for Vg	47	kJ mol-1	28	Eq. S102
	The activation energy for Vm	20	kJ mol-1	28	Eq. S103
	The activation energy for KsDOC	30	kJ mol-1	28	Eq. S104
*The data in the parentheses represent the values for the corresponding enzyme function class (EFCi) listed in the description column.
†Since N is not the limiting element in the Panama site, the model test in the Panama site here only focuses on the decomposition of lignocellulose-containing SOM and P-containing SOM in this study. Therefore, the values listed here are only kinetic parameters related to decomposing of lignocellulose-containing SOM and P-containing SOM.
‡The value is the weighted mean of the corresponding kinetic parameters of all EC numbers in each EFC. The weighted factor was the relative gene abundance of each EC number within the EFC.
aThe values is only for the CoMENDH and CoMENDHD.
bThe values is only for the CoMENDM.
cThe values is only for the CoMENDL.
